# Supplementary material for: Factors associated with elevated blood pressure or hypertension in Afro-Caribbean youth: a cross-sectional study
Source: PeerJ journal article supplement (doi:10.7717/peerj.4385), 2018-02-13
Supplement: CRRisk_Questionnaire3_TSF_revision2.pdf [file CRRisk_Questionnaire3_TSF_revision2.pdf]

Confidential

Interviewer's ID #

## Impact of Early Life Experiences on Cardio-Respiratory Risk and Bone Mineral Density in Jamaican Adolescents

*Good morning. Thank you for participating in the study. I will be asking you some questions. Please take your time to answer each question as accurately as possible*

### SECTION 1: DEMOGRAPHY/EDUCATION/RELIGION

1.1 ID NUMBER:  (use same ID number as in previous study)

1.1a NEW ID #:

1.2 Date of Interview // (year/month/day)

1.3 SURNAME:

1.4 FIRST NAME:

1.5 MIDDLE NAME:

1.6 MARITAL STATUS: 1  SINGLE      2  MARRIED      3  DIVORCED

1.7 MOTHER'S NAME: \_\_\_\_\_

1.8 FATHER'S NAME: \_\_\_\_\_

1.9 AGE OF PARENTS: a.  MOTHER b.  FATHER c.  N/R  
d.  DK

1.10 GENDER: 0  Male      1  Female

1.11 Date of Birth // (YEAR/MONTH/DAY)

1.12 Age at last birth day  years

1.13 HOME ADDRESS: \_\_\_\_\_

\_\_\_\_\_  
\_\_\_\_\_

Case ID#

Interviewer's ID #

Impact of Early Life Experiences on Cardio- Respiratory Risk and Bone mineral Density in Jamaican Adolescents

**SECTION 1 cont'd: DEMOGRAPHY/EDUCATION/RELIGION**

*(D/K = I don't know, N/A = Not applicable, N/R = No Response)*

1.14 Are you currently: 1  In School 2  In College/University  
3  Working 4  At Home/ Unemployed 99  N/R

1.15 Name of School or College or Workplace: \_\_\_\_\_  
8  N/A 99  N/R

1.16 What is your highest level of education completed?  
0  None 1  All Age/ Primary 2  Secondary/Technical/High School  
3  College / University 9  D/K 99  N/R

1.17 Are you currently employed? 0  No 1  Yes 99  N/R

If yes, give type of employment: *(If no, go to question 1.18)*

1  Full time ( $\geq 30$  hours /week) 2  Part time ( $\leq 29$  hour/ week)  
3  Self employed

1.18 What is your religious affiliation?  
0  None 1  Christian 2  Rastafarian 3  Muslim 4  Jewish  
5  other, specify \_\_\_\_\_ 8  D/K 9  N/R

1.19 If Christian, What denomination?  
1  Roman Catholic 2  United/Baptist/Anglican/ Methodist  
3  Church of God/ Pentecostal 4  Seventh Day Adventist  
5  Other \_\_\_\_\_ 8  N/A 99  N/R

1.20 Are you actively practicing your religion?  
0  No 1  yes 8  N/A 9  D/ K 99  No Response

**SECTION 2: FAMILY MEDICAL HISTORY***Have any of the following members of your family ever had the illnesses listed below?**(Please place a (✓) tick in the appropriate box to indicate your response)***(D/K = I don't know, N/A = Not applicable, N/R = No Response)****2.1 High blood pressure**

- |    |             |                               |                                |                                |                                |                                 |
|----|-------------|-------------------------------|--------------------------------|--------------------------------|--------------------------------|---------------------------------|
| a. | Mother      | 0 <input type="checkbox"/> No | 1 <input type="checkbox"/> Yes | 8 <input type="checkbox"/> N/A | 9 <input type="checkbox"/> D/K | 99 <input type="checkbox"/> N/R |
| b. | Father      | 0 <input type="checkbox"/> No | 1 <input type="checkbox"/> Yes | 8 <input type="checkbox"/> N/A | 9 <input type="checkbox"/> D/K | 99 <input type="checkbox"/> N/R |
| c. | Sister      | 0 <input type="checkbox"/> No | 1 <input type="checkbox"/> Yes | 8 <input type="checkbox"/> N/A | 9 <input type="checkbox"/> D/K | 99 <input type="checkbox"/> N/R |
| d. | Brother     | 0 <input type="checkbox"/> No | 1 <input type="checkbox"/> Yes | 8 <input type="checkbox"/> N/A | 9 <input type="checkbox"/> D/K | 99 <input type="checkbox"/> N/R |
| e. | Grandparent | 0 <input type="checkbox"/> No | 1 <input type="checkbox"/> Yes | 8 <input type="checkbox"/> N/A | 9 <input type="checkbox"/> D/K | 99 <input type="checkbox"/> N/R |
| f. | Other       | 0 <input type="checkbox"/> No | 1 <input type="checkbox"/> Yes | 8 <input type="checkbox"/> N/A | 9 <input type="checkbox"/> D/K | 99 <input type="checkbox"/> N/R |

If other, specify \_\_\_\_\_

**2.2 Diabetes mellitus (sugar)**

- |    |             |                               |                                |                                |                                |                                 |
|----|-------------|-------------------------------|--------------------------------|--------------------------------|--------------------------------|---------------------------------|
| a. | Mother      | 0 <input type="checkbox"/> No | 1 <input type="checkbox"/> Yes | 8 <input type="checkbox"/> N/A | 9 <input type="checkbox"/> D/K | 99 <input type="checkbox"/> N/R |
| b. | Father      | 0 <input type="checkbox"/> No | 1 <input type="checkbox"/> Yes | 8 <input type="checkbox"/> N/A | 9 <input type="checkbox"/> D/K | 99 <input type="checkbox"/> N/R |
| c. | Sister      | 0 <input type="checkbox"/> No | 1 <input type="checkbox"/> Yes | 8 <input type="checkbox"/> N/A | 9 <input type="checkbox"/> D/K | 99 <input type="checkbox"/> N/R |
| d. | Brother     | 0 <input type="checkbox"/> No | 1 <input type="checkbox"/> Yes | 8 <input type="checkbox"/> N/A | 9 <input type="checkbox"/> D/K | 99 <input type="checkbox"/> N/R |
| e. | Grandparent | 0 <input type="checkbox"/> No | 1 <input type="checkbox"/> Yes | 8 <input type="checkbox"/> N/A | 9 <input type="checkbox"/> D/K | 99 <input type="checkbox"/> N/R |
| f. | Other       | 0 <input type="checkbox"/> No | 1 <input type="checkbox"/> Yes | 8 <input type="checkbox"/> N/A | 9 <input type="checkbox"/> D/K | 99 <input type="checkbox"/> N/R |

If other, specify \_\_\_\_\_

**2.3 Heart attack**

- |    |             |                               |                                |                                |                                |                                 |
|----|-------------|-------------------------------|--------------------------------|--------------------------------|--------------------------------|---------------------------------|
| a. | Mother      | 0 <input type="checkbox"/> No | 1 <input type="checkbox"/> Yes | 8 <input type="checkbox"/> N/A | 9 <input type="checkbox"/> D/K | 99 <input type="checkbox"/> N/R |
| b. | Father      | 0 <input type="checkbox"/> No | 1 <input type="checkbox"/> Yes | 8 <input type="checkbox"/> N/A | 9 <input type="checkbox"/> D/K | 99 <input type="checkbox"/> N/R |
| c. | Sister      | 0 <input type="checkbox"/> No | 1 <input type="checkbox"/> Yes | 8 <input type="checkbox"/> N/A | 9 <input type="checkbox"/> D/K | 99 <input type="checkbox"/> N/R |
| d. | Brother     | 0 <input type="checkbox"/> No | 1 <input type="checkbox"/> Yes | 8 <input type="checkbox"/> N/A | 9 <input type="checkbox"/> D/K | 99 <input type="checkbox"/> N/R |
| e. | Grandparent | 0 <input type="checkbox"/> No | 1 <input type="checkbox"/> Yes | 8 <input type="checkbox"/> N/A | 9 <input type="checkbox"/> D/K | 99 <input type="checkbox"/> N/R |
| f. | Other       | 0 <input type="checkbox"/> No | 1 <input type="checkbox"/> Yes | 8 <input type="checkbox"/> N/A | 9 <input type="checkbox"/> D/K | 99 <input type="checkbox"/> N/R |

If other, specify \_\_\_\_\_

**2.4 Stroke**

- |    |             |                               |                                |                                |                                |                                 |
|----|-------------|-------------------------------|--------------------------------|--------------------------------|--------------------------------|---------------------------------|
| a. | Mother      | 0 <input type="checkbox"/> No | 1 <input type="checkbox"/> Yes | 8 <input type="checkbox"/> N/A | 9 <input type="checkbox"/> D/K | 99 <input type="checkbox"/> N/R |
| b. | Father      | 0 <input type="checkbox"/> No | 1 <input type="checkbox"/> Yes | 8 <input type="checkbox"/> N/A | 9 <input type="checkbox"/> D/K | 99 <input type="checkbox"/> N/R |
| c. | Sister      | 0 <input type="checkbox"/> No | 1 <input type="checkbox"/> Yes | 8 <input type="checkbox"/> N/A | 9 <input type="checkbox"/> D/K | 99 <input type="checkbox"/> N/R |
| d. | Brother     | 0 <input type="checkbox"/> No | 1 <input type="checkbox"/> Yes | 8 <input type="checkbox"/> N/A | 9 <input type="checkbox"/> D/K | 99 <input type="checkbox"/> N/R |
| e. | Grandparent | 0 <input type="checkbox"/> No | 1 <input type="checkbox"/> Yes | 8 <input type="checkbox"/> N/A | 9 <input type="checkbox"/> D/K | 99 <input type="checkbox"/> N/R |
| f. | Other       | 0 <input type="checkbox"/> No | 1 <input type="checkbox"/> Yes | 8 <input type="checkbox"/> N/A | 9 <input type="checkbox"/> D/K | 99 <input type="checkbox"/> N/R |

If other, specify \_\_\_\_\_

Case ID#

Interviewer's ID #

Impact of Early Life Experiences on Cardio-Respiratory Risk and Bone mineral Density in Jamaican Adolescents

**2.5 Obesity (very fat)**

- |    |             |                               |                                |                                |                                |                                 |
|----|-------------|-------------------------------|--------------------------------|--------------------------------|--------------------------------|---------------------------------|
| a. | Mother      | 0 <input type="checkbox"/> No | 1 <input type="checkbox"/> Yes | 8 <input type="checkbox"/> N/A | 9 <input type="checkbox"/> D/K | 99 <input type="checkbox"/> N/R |
| b. | Father      | 0 <input type="checkbox"/> No | 1 <input type="checkbox"/> Yes | 8 <input type="checkbox"/> N/A | 9 <input type="checkbox"/> D/K | 99 <input type="checkbox"/> N/R |
| c. | Sister      | 0 <input type="checkbox"/> No | 1 <input type="checkbox"/> Yes | 8 <input type="checkbox"/> N/A | 9 <input type="checkbox"/> D/K | 99 <input type="checkbox"/> N/R |
| d. | Brother     | 0 <input type="checkbox"/> No | 1 <input type="checkbox"/> Yes | 8 <input type="checkbox"/> N/A | 9 <input type="checkbox"/> D/K | 99 <input type="checkbox"/> N/R |
| e. | Grandparent | 0 <input type="checkbox"/> No | 1 <input type="checkbox"/> Yes | 8 <input type="checkbox"/> N/A | 9 <input type="checkbox"/> D/K | 99 <input type="checkbox"/> N/R |
| f. | Other       | 0 <input type="checkbox"/> No | 1 <input type="checkbox"/> Yes | 8 <input type="checkbox"/> N/A | 9 <input type="checkbox"/> D/K | 99 <input type="checkbox"/> N/R |

If other, specify \_\_\_\_\_

**2.6 High cholesterol**

- |    |             |                               |                                |                                |                                |                                 |
|----|-------------|-------------------------------|--------------------------------|--------------------------------|--------------------------------|---------------------------------|
| a. | Mother      | 0 <input type="checkbox"/> No | 1 <input type="checkbox"/> Yes | 8 <input type="checkbox"/> N/A | 9 <input type="checkbox"/> D/K | 99 <input type="checkbox"/> N/R |
| b. | Father      | 0 <input type="checkbox"/> No | 1 <input type="checkbox"/> Yes | 8 <input type="checkbox"/> N/A | 9 <input type="checkbox"/> D/K | 99 <input type="checkbox"/> N/R |
| c. | Sister      | 0 <input type="checkbox"/> No | 1 <input type="checkbox"/> Yes | 8 <input type="checkbox"/> N/A | 9 <input type="checkbox"/> D/K | 99 <input type="checkbox"/> N/R |
| d. | Brother     | 0 <input type="checkbox"/> No | 1 <input type="checkbox"/> Yes | 8 <input type="checkbox"/> N/A | 9 <input type="checkbox"/> D/K | 99 <input type="checkbox"/> N/R |
| e. | Grandparent | 0 <input type="checkbox"/> No | 1 <input type="checkbox"/> Yes | 8 <input type="checkbox"/> N/A | 9 <input type="checkbox"/> D/K | 99 <input type="checkbox"/> N/R |
| f. | Other       | 0 <input type="checkbox"/> No | 1 <input type="checkbox"/> Yes | 8 <input type="checkbox"/> N/A | 9 <input type="checkbox"/> D/K | 99 <input type="checkbox"/> N/R |

If other, specify \_\_\_\_\_

**2.7 Heart failure**

- |    |             |                               |                                |                                |                                |                                 |
|----|-------------|-------------------------------|--------------------------------|--------------------------------|--------------------------------|---------------------------------|
| a. | Mother      | 0 <input type="checkbox"/> No | 1 <input type="checkbox"/> Yes | 8 <input type="checkbox"/> N/A | 9 <input type="checkbox"/> D/K | 99 <input type="checkbox"/> N/R |
| b. | Father      | 0 <input type="checkbox"/> No | 1 <input type="checkbox"/> Yes | 8 <input type="checkbox"/> N/A | 9 <input type="checkbox"/> D/K | 99 <input type="checkbox"/> N/R |
| c. | Sister      | 0 <input type="checkbox"/> No | 1 <input type="checkbox"/> Yes | 8 <input type="checkbox"/> N/A | 9 <input type="checkbox"/> D/K | 99 <input type="checkbox"/> N/R |
| d. | Brother     | 0 <input type="checkbox"/> No | 1 <input type="checkbox"/> Yes | 8 <input type="checkbox"/> N/A | 9 <input type="checkbox"/> D/K | 99 <input type="checkbox"/> N/R |
| e. | Grandparent | 0 <input type="checkbox"/> No | 1 <input type="checkbox"/> Yes | 8 <input type="checkbox"/> N/A | 9 <input type="checkbox"/> D/K | 99 <input type="checkbox"/> N/R |
| f. | Other       | 0 <input type="checkbox"/> No | 1 <input type="checkbox"/> Yes | 8 <input type="checkbox"/> N/A | 9 <input type="checkbox"/> D/K | 99 <input type="checkbox"/> N/R |

If other, specify \_\_\_\_\_

**2.8 Kidney failure**

- |    |             |                               |                                |                                |                                |                                 |
|----|-------------|-------------------------------|--------------------------------|--------------------------------|--------------------------------|---------------------------------|
| a. | Mother      | 0 <input type="checkbox"/> No | 1 <input type="checkbox"/> Yes | 8 <input type="checkbox"/> N/A | 9 <input type="checkbox"/> D/K | 99 <input type="checkbox"/> N/R |
| b. | Father      | 0 <input type="checkbox"/> No | 1 <input type="checkbox"/> Yes | 8 <input type="checkbox"/> N/A | 9 <input type="checkbox"/> D/K | 99 <input type="checkbox"/> N/R |
| c. | Sister      | 0 <input type="checkbox"/> No | 1 <input type="checkbox"/> Yes | 8 <input type="checkbox"/> N/A | 9 <input type="checkbox"/> D/K | 99 <input type="checkbox"/> N/R |
| d. | Brother     | 0 <input type="checkbox"/> No | 1 <input type="checkbox"/> Yes | 8 <input type="checkbox"/> N/A | 9 <input type="checkbox"/> D/K | 99 <input type="checkbox"/> N/R |
| e. | Grandparent | 0 <input type="checkbox"/> No | 1 <input type="checkbox"/> Yes | 8 <input type="checkbox"/> N/A | 9 <input type="checkbox"/> D/K | 99 <input type="checkbox"/> N/R |
| f. | Other       | 0 <input type="checkbox"/> No | 1 <input type="checkbox"/> Yes | 8 <input type="checkbox"/> N/A | 9 <input type="checkbox"/> D/K | 99 <input type="checkbox"/> N/R |

If other, specify \_\_\_\_\_

Case ID#

Interviewer's ID #

Impact of Early Life Experiences on Cardio- Respiratory Risk and Bone mineral Density in Jamaican Adolescents

**2.9 Asthma**

- |    |             |                               |                                |                                |                                |                                 |
|----|-------------|-------------------------------|--------------------------------|--------------------------------|--------------------------------|---------------------------------|
| a. | Mother      | 0 <input type="checkbox"/> No | 1 <input type="checkbox"/> Yes | 8 <input type="checkbox"/> N/A | 9 <input type="checkbox"/> D/K | 99 <input type="checkbox"/> N/R |
| b. | Father      | 0 <input type="checkbox"/> No | 1 <input type="checkbox"/> Yes | 8 <input type="checkbox"/> N/A | 9 <input type="checkbox"/> D/K | 99 <input type="checkbox"/> N/R |
| c. | Sister      | 0 <input type="checkbox"/> No | 1 <input type="checkbox"/> Yes | 8 <input type="checkbox"/> N/A | 9 <input type="checkbox"/> D/K | 99 <input type="checkbox"/> N/R |
| d. | Brother     | 0 <input type="checkbox"/> No | 1 <input type="checkbox"/> Yes | 8 <input type="checkbox"/> N/A | 9 <input type="checkbox"/> D/K | 99 <input type="checkbox"/> N/R |
| e. | Grandparent | 0 <input type="checkbox"/> No | 1 <input type="checkbox"/> Yes | 8 <input type="checkbox"/> N/A | 9 <input type="checkbox"/> D/K | 99 <input type="checkbox"/> N/R |
| f. | Other       | 0 <input type="checkbox"/> No | 1 <input type="checkbox"/> Yes | 8 <input type="checkbox"/> N/A | 9 <input type="checkbox"/> D/K | 99 <input type="checkbox"/> N/R |

If other, specify \_\_\_\_\_

**2.10 Chronic Obstructive Airways Disease (COPD - bronchitis/emphysema)**

- |    |             |                               |                                |                                |                                |                                 |
|----|-------------|-------------------------------|--------------------------------|--------------------------------|--------------------------------|---------------------------------|
| a. | Mother      | 0 <input type="checkbox"/> No | 1 <input type="checkbox"/> Yes | 8 <input type="checkbox"/> N/A | 9 <input type="checkbox"/> D/K | 99 <input type="checkbox"/> N/R |
| b. | Father      | 0 <input type="checkbox"/> No | 1 <input type="checkbox"/> Yes | 8 <input type="checkbox"/> N/A | 9 <input type="checkbox"/> D/K | 99 <input type="checkbox"/> N/R |
| c. | Sister      | 0 <input type="checkbox"/> No | 1 <input type="checkbox"/> Yes | 8 <input type="checkbox"/> N/A | 9 <input type="checkbox"/> D/K | 99 <input type="checkbox"/> N/R |
| d. | Brother     | 0 <input type="checkbox"/> No | 1 <input type="checkbox"/> Yes | 8 <input type="checkbox"/> N/A | 9 <input type="checkbox"/> D/K | 99 <input type="checkbox"/> N/R |
| e. | Grandparent | 0 <input type="checkbox"/> No | 1 <input type="checkbox"/> Yes | 8 <input type="checkbox"/> N/A | 9 <input type="checkbox"/> D/K | 99 <input type="checkbox"/> N/R |
| f. | Other       | 0 <input type="checkbox"/> No | 1 <input type="checkbox"/> Yes | 8 <input type="checkbox"/> N/A | 9 <input type="checkbox"/> D/K | 99 <input type="checkbox"/> N/R |

If other, specify \_\_\_\_\_

**2.11 Cancer**

- |    |             |                               |                                |                                |                                |                                 |
|----|-------------|-------------------------------|--------------------------------|--------------------------------|--------------------------------|---------------------------------|
| a. | Mother      | 0 <input type="checkbox"/> No | 1 <input type="checkbox"/> Yes | 8 <input type="checkbox"/> N/A | 9 <input type="checkbox"/> D/K | 99 <input type="checkbox"/> N/R |
| b. | Father      | 0 <input type="checkbox"/> No | 1 <input type="checkbox"/> Yes | 8 <input type="checkbox"/> N/A | 9 <input type="checkbox"/> D/K | 99 <input type="checkbox"/> N/R |
| c. | Sister      | 0 <input type="checkbox"/> No | 1 <input type="checkbox"/> Yes | 8 <input type="checkbox"/> N/A | 9 <input type="checkbox"/> D/K | 99 <input type="checkbox"/> N/R |
| d. | Brother     | 0 <input type="checkbox"/> No | 1 <input type="checkbox"/> Yes | 8 <input type="checkbox"/> N/A | 9 <input type="checkbox"/> D/K | 99 <input type="checkbox"/> N/R |
| e. | Grandparent | 0 <input type="checkbox"/> No | 1 <input type="checkbox"/> Yes | 8 <input type="checkbox"/> N/A | 9 <input type="checkbox"/> D/K | 99 <input type="checkbox"/> N/R |
| f. | Other       | 0 <input type="checkbox"/> No | 1 <input type="checkbox"/> Yes | 8 <input type="checkbox"/> N/A | 9 <input type="checkbox"/> D/K | 99 <input type="checkbox"/> N/R |

If other, specify \_\_\_\_\_

If yes to any category above, state type of cancer and relative affected: \_\_\_\_\_

**2.12 Fractures (broken bones)**

- |    |             |                               |                                |                                |                                |                                 |
|----|-------------|-------------------------------|--------------------------------|--------------------------------|--------------------------------|---------------------------------|
| a. | Mother      | 0 <input type="checkbox"/> No | 1 <input type="checkbox"/> Yes | 8 <input type="checkbox"/> N/A | 9 <input type="checkbox"/> D/K | 99 <input type="checkbox"/> N/R |
| b. | Father      | 0 <input type="checkbox"/> No | 1 <input type="checkbox"/> Yes | 8 <input type="checkbox"/> N/A | 9 <input type="checkbox"/> D/K | 99 <input type="checkbox"/> N/R |
| c. | Sister      | 0 <input type="checkbox"/> No | 1 <input type="checkbox"/> Yes | 8 <input type="checkbox"/> N/A | 9 <input type="checkbox"/> D/K | 99 <input type="checkbox"/> N/R |
| d. | Brother     | 0 <input type="checkbox"/> No | 1 <input type="checkbox"/> Yes | 8 <input type="checkbox"/> N/A | 9 <input type="checkbox"/> D/K | 99 <input type="checkbox"/> N/R |
| e. | Grandparent | 0 <input type="checkbox"/> No | 1 <input type="checkbox"/> Yes | 8 <input type="checkbox"/> N/A | 9 <input type="checkbox"/> D/K | 99 <input type="checkbox"/> N/R |
| f. | Other       | 0 <input type="checkbox"/> No | 1 <input type="checkbox"/> Yes | 8 <input type="checkbox"/> N/A | 9 <input type="checkbox"/> D/K | 99 <input type="checkbox"/> N/R |

If other, specify \_\_\_\_\_

Case ID#

Interviewer's ID #

Impact of Early Life Experiences on Cardio- Respiratory Risk and Bone mineral Density in Jamaican Adolescents

2.13 **Mental Health Disorders** (e.g. anxiety, depression, schizophrenia)

- |    |             |                               |                                |                                |                                |                                 |
|----|-------------|-------------------------------|--------------------------------|--------------------------------|--------------------------------|---------------------------------|
| a. | Mother      | 0 <input type="checkbox"/> No | 1 <input type="checkbox"/> Yes | 8 <input type="checkbox"/> N/A | 9 <input type="checkbox"/> D/K | 99 <input type="checkbox"/> N/R |
| b. | Father      | 0 <input type="checkbox"/> No | 1 <input type="checkbox"/> Yes | 8 <input type="checkbox"/> N/A | 9 <input type="checkbox"/> D/K | 99 <input type="checkbox"/> N/R |
| c. | Sister      | 0 <input type="checkbox"/> No | 1 <input type="checkbox"/> Yes | 8 <input type="checkbox"/> N/A | 9 <input type="checkbox"/> D/K | 99 <input type="checkbox"/> N/R |
| d. | Brother     | 0 <input type="checkbox"/> No | 1 <input type="checkbox"/> Yes | 8 <input type="checkbox"/> N/A | 9 <input type="checkbox"/> D/K | 99 <input type="checkbox"/> N/R |
| e. | Grandparent | 0 <input type="checkbox"/> No | 1 <input type="checkbox"/> Yes | 8 <input type="checkbox"/> N/A | 9 <input type="checkbox"/> D/K | 99 <input type="checkbox"/> N/R |
| f. | Other       | 0 <input type="checkbox"/> No | 1 <input type="checkbox"/> Yes | 8 <input type="checkbox"/> N/A | 9 <input type="checkbox"/> D/K | 99 <input type="checkbox"/> N/R |

If other, specify \_\_\_\_\_

2.14 Has anyone in your family died suddenly (*unexpected death except motor vehicle accident or other accidental or violent death*)

0  No      1  Yes      9  D/K      99  N/R

**If yes, give relationship, age, and cause of death if known? *If NO go to section 3***

a. **Father**      0  No      1  Yes      9  D/K      99  N/R  
Cause of death (if known) \_\_\_\_\_ Age

ICD Cod: .

b. **Mother**      0  No      1  Yes      9  D/K      99  N/R  
Cause of death (if known) \_\_\_\_\_ Age

ICD Code: .

c. **Brother/Sister**      0  No      1  Yes      9  D/K      99  N/R  
Cause of death (if known) \_\_\_\_\_ Age

ICD Code: .

d. **Grandparent**      0  No      1  Yes      9  D/K      99  N/R  
Cause of death (if known) \_\_\_\_\_ Age

ICD Code: .

e. **Other**, specify \_\_\_\_\_  
Cause of death (if known) \_\_\_\_\_ Age

Case ID#

Interviewer's ID #

Impact of Early Life Experiences on Cardio- Respiratory Risk and Bone mineral Density in Jamaican Adolescents

**SECTION 3: MEDICAL HISTORY**

*I am going to ask you some questions about your health and any sicknesses you might have had in the past.*

*Think carefully before you answer because it is important that we get very accurate information.*

**(DK= Don't Know. NR= No Response)**

3.1 Have you ever been diagnosed or treated for any of the following medical conditions?

- |                                                                 |                               |                                |                                |                                 |
|-----------------------------------------------------------------|-------------------------------|--------------------------------|--------------------------------|---------------------------------|
| a. Heart disease                                                | 0 <input type="checkbox"/> NO | 1 <input type="checkbox"/> YES | 9 <input type="checkbox"/> D/K | 99 <input type="checkbox"/> N/R |
| b. Rheumatic fever                                              | 0 <input type="checkbox"/> NO | 1 <input type="checkbox"/> YES | 9 <input type="checkbox"/> D/K | 99 <input type="checkbox"/> N/R |
| c. Diabetes mellitus (sugar)                                    | 0 <input type="checkbox"/> NO | 1 <input type="checkbox"/> YES | 9 <input type="checkbox"/> D/K | 99 <input type="checkbox"/> N/R |
| d. Sickle cell disease                                          | 0 <input type="checkbox"/> NO | 1 <input type="checkbox"/> YES | 9 <input type="checkbox"/> D/K | 99 <input type="checkbox"/> N/R |
| e. Sickle cell trait                                            | 0 <input type="checkbox"/> NO | 1 <input type="checkbox"/> YES | 9 <input type="checkbox"/> D/K | 99 <input type="checkbox"/> N/R |
| f. Stroke                                                       | 0 <input type="checkbox"/> NO | 1 <input type="checkbox"/> YES | 9 <input type="checkbox"/> D/K | 99 <input type="checkbox"/> N/R |
| g. High blood pressure                                          | 0 <input type="checkbox"/> NO | 1 <input type="checkbox"/> YES | 9 <input type="checkbox"/> D/K | 99 <input type="checkbox"/> N/R |
| h. High cholesterol                                             | 0 <input type="checkbox"/> NO | 1 <input type="checkbox"/> YES | 9 <input type="checkbox"/> D/K | 99 <input type="checkbox"/> N/R |
| i. Obesity / Overweight                                         | 0 <input type="checkbox"/> NO | 1 <input type="checkbox"/> YES | 9 <input type="checkbox"/> D/K | 99 <input type="checkbox"/> N/R |
| j. Asthma / Wheezing                                            | 0 <input type="checkbox"/> NO | 1 <input type="checkbox"/> YES | 9 <input type="checkbox"/> D/K | 99 <input type="checkbox"/> N/R |
| k. Bronchitis                                                   | 0 <input type="checkbox"/> NO | 1 <input type="checkbox"/> YES | 9 <input type="checkbox"/> D/K | 99 <input type="checkbox"/> N/R |
| l. Kidney disease                                               | 0 <input type="checkbox"/> NO | 1 <input type="checkbox"/> YES | 9 <input type="checkbox"/> D/K | 99 <input type="checkbox"/> N/R |
| m. Sexually trans. disease                                      | 0 <input type="checkbox"/> NO | 1 <input type="checkbox"/> YES | 9 <input type="checkbox"/> D/K | 99 <input type="checkbox"/> N/R |
| n. Pneumonia / Bronchitis                                       | 0 <input type="checkbox"/> NO | 1 <input type="checkbox"/> YES | 9 <input type="checkbox"/> D/K | 99 <input type="checkbox"/> N/R |
| o. Cerebral palsy                                               | 0 <input type="checkbox"/> NO | 1 <input type="checkbox"/> YES | 9 <input type="checkbox"/> D/K | 99 <input type="checkbox"/> N/R |
| p. Eczema                                                       | 0 <input type="checkbox"/> NO | 1 <input type="checkbox"/> YES | 9 <input type="checkbox"/> D/K | 99 <input type="checkbox"/> N/R |
| q. Muscle dystrophy                                             | 0 <input type="checkbox"/> NO | 1 <input type="checkbox"/> YES | 9 <input type="checkbox"/> D/K | 99 <input type="checkbox"/> N/R |
| r. Paralysis /Weak legs                                         | 0 <input type="checkbox"/> NO | 1 <input type="checkbox"/> YES | 9 <input type="checkbox"/> D/K | 99 <input type="checkbox"/> N/R |
| s. Abnormalities of the spine<br>(e.g. spina bifida, scoliosis) | 0 <input type="checkbox"/> NO | 1 <input type="checkbox"/> YES | 9 <input type="checkbox"/> D/K | 99 <input type="checkbox"/> N/R |
| t. Arthritis                                                    | 0 <input type="checkbox"/> NO | 1 <input type="checkbox"/> YES | 9 <input type="checkbox"/> D/K | 99 <input type="checkbox"/> N/R |
| u. Thyroid problems                                             | 0 <input type="checkbox"/> NO | 1 <input type="checkbox"/> YES | 9 <input type="checkbox"/> D/K | 99 <input type="checkbox"/> N/R |
| v. Epilepsy/seizures                                            | 0 <input type="checkbox"/> NO | 1 <input type="checkbox"/> YES | 9 <input type="checkbox"/> D/K | 99 <input type="checkbox"/> N/R |
| w. Broken bones/fracture                                        | 0 <input type="checkbox"/> NO | 1 <input type="checkbox"/> YES | 9 <input type="checkbox"/> D/K | 99 <input type="checkbox"/> N/R |

If yes, specify bone and where treated: \_\_\_\_\_

Case ID#

Interviewer's ID #

Impact of Early Life Experiences on Cardio- Respiratory Risk and Bone mineral Density in Jamaican Adolescents

3.2a Are you taking any medication / medicines / tablets on a regular basis?

0  NO      1  YES      *(If no, go to question 3.3)*

3.2b. If yes please give names and the condition for which the medication is being taken:

---

---

---

3.3a Have you been prescribed any other medication that you should take regularly, but are not taking?      0  NO      1  YES      *(If no, go to question 3.4)*

3.3b. If yes, please give names of medications and the condition for which the medication was prescribed: \_\_\_\_\_

---

---

3.4a. Do you currently take multivitamin supplements?      0  NO      1  YES      9  D/K  
99  N/R      *(If no, go to question 3.4d)*

3.4b. How many tablets do you take per week?       Tablets

3.4c. For how long have you been taking these tablets?       Months

3.4d Do you currently take Iron (tablets / liquid)?      0  No      1  yes      9  D/K      99  N/R

3.5 Do you take herbal supplements?

0  No      1  yes      9  D/K      99  N/R

If yes, specify \_\_\_\_\_

3.6 Have you had or been treated for any infections or inflammatory condition (e.g. flu-like illness pneumonia, arthritis etc) in the last six months?

0  NO      1  YES      9  D/K      99  N/R      *(If no, go to question 3.7)*

3.6b. If yes, give details: Name of condition \_\_\_\_\_

Approximate date \_\_\_\_\_ Treatment received \_\_\_\_\_

Approximate date of recovery \_\_\_\_\_



Case ID#

Interviewer's ID #

Impact of Early Life Experiences on Cardio- Respiratory Risk and Bone mineral Density in Jamaican Adolescents

3.7 Have you ever had any surgery / operations done at any time in the past?

0  NO      1  YES      9  D/K      99  N/R      **(If no, go to question 3.8)**

a. If yes, specify the type of operation and when it was done. \_\_\_\_\_  
\_\_\_\_\_

3.8. Approximately how often do you usually see a doctor?

0  < once per year      1  1-2 times/year      2  3-4 times/year  
4  >four times/year      9  D/K      99  N/R

3.9. Where do you usually go to see the doctor? (select only one response)

1  hospital casualty / emergency room      2  hospital clinic      3  health centre  
4  private doctor – general practitioner      5  private doctor – specialist  
6  other, specify \_\_\_\_\_

3.10a Were you interviewed in the last follow up? 0  No    1  Yes    9  D/K    99  N/R

3.10b If yes, have you been admitted in hospital (stayed overnight or longer), since the last time you were interviewed or in the last 4 years?

0  NO      1  YES      9  D/K      99  N/R      **(If no, go to question 3.11)**

3.10c If no, have you been admitted in hospital (stayed overnight or longer), in the last 4 years?

0  NO      1  YES      9  D/K      99  N/R      **(If no, go to question 3.11)**

3.10d If yes to 3.10b or c, list all the admissions and the reason you were admitted in the box below.

**(If more than 5 hospitalizations fill out a separate form)**

| Admission # | Age at admission | No. of nights | Reason for admission | Hospital name |
|-------------|------------------|---------------|----------------------|---------------|
| 1           |                  |               |                      |               |
| 2           |                  |               |                      |               |
| 3           |                  |               |                      |               |
| 4           |                  |               |                      |               |
| 5           |                  |               |                      |               |

3.10e If there are more than 5 admissions give approximate total

Case ID#

Interviewer's ID #

Impact of Early Life Experiences on Cardio- Respiratory Risk and Bone mineral Density in Jamaican Adolescents

3.11 (*For females only*)

a. When was your last menstrual period?

1  <1 Month ago 2  1-2 Month ago 3  >2Month ago 9  D/K 99  N/R

b. Have you ever been pregnant? 0  NO 1  YES 9  D/K 99  N/R

*(If no, go to section 3.12)*

c. How many times have you been pregnant?

d. Have you had any miscarriages? 0  NO 1  YES 9  D/K 99  N/R

If yes how many? \_\_\_\_\_

e. How many children do you have?  9  D/K 99  N/R

f. How old are the children? \_\_\_\_\_

g. Did you breastfeed the child/children? 0  NO 1  YES 9  D/K 99  N/R

h. Did you take calcium supplements during the pregnancy?

0  NO 1  YES 9  D/K 99  N/R

**(Males and females)**

3.12 When was the last time you were seen by a dentist?

0  NEVER 1  <1 Year ago 2  1-2Years ago 3  > 2Years ago

9  D/K 99  N/R

**SECTION4: PHYSICAL ACTIVITY, SOCIAL HABITS, AND EXPOSURE TO INJURY/VIOLENCE**

*For questions 4.1-4.5, give your answer using the stated options.*

**ACTIVITY**

4.1. How do you rate your level of physical activity?

- 1  very active                      2  moderately active  
 3  occasionally active              4  inactive                      9  I don't know

4.2. Over **the last seven days**, how many days did you play an active sport?

(e.g. football, cricket, netball, swimming)

- 0  Never    1  1-2 times    2  3-4 times    3  5-6 times    4  everyday    9  D/K  
 99  N/R

4.3. On average, how many hours do you spend playing a sport each week?

- 1  None    2  less than 1hr    3  1-2hrs    4  3-4hrs    5  5-10hrs    6  11-20hrs  
 7  >20hrs

4.4. Over **the last seven days**, on how many days did you do other exercise (e.g. brisk walking, jogging, lifting weights, dance classes, or workout at a gym)?

- 1  Never    2  1-2 times    3  3-4 times    4  5-6 times    5  everyday  
 9  DK    99  NR

4.5. On average, how many hours do you spend each week doing the exercise stated in 4.4?

- 1  None    2  less than 1hr    3  1-2hrs    4  3-4hrs    5  5-10hrs    6  11-20hrs  
 7  >20hrs    9  DK    99  NR

4.6 At what grade did you stop having physical education (PE) / games classes at school?

4.6a How old were you when you stopped doing physical Exercise at school?

- Yrs    9  DK    99  NR

4.6b Did you represent your school in any sport?

- 0  NO    1  YES    9  DK    99  NR

4.6c. Do you watch television?    0  NO    1  YES    **(If no, skip to question 4.7)**

4.6d. How many hours of television do you watch per day during the week (Monday-Friday)

4.6e. How may hours of television do you watch in total on Saturday & Sunday (weekends)

Case ID#

Interviewer's ID #

Impact of Early Life Experiences on Cardio- Respiratory Risk and Bone mineral Density in Jamaican Adolescents

**Tobacco, alcohol and other drugs**

4.7. Have you ever smoked a cigarette or other form of tobacco (cigar or pipe)?

0  NO      1  YES      9  D/K      99  N/R

**(If you have never smoked tobacco go to question 4.8)**

4.7a. How old were you when you smoked a cigarette or cigar for the first time?

yrs      9  D/K      99  N/R

4.7b. Do you currently smoke?      0  NO      1  YES

4.7c. In the past month, on how many days did you smoke cigarettes?

days      9  D/K      99  N/R

4.7d. On average, how many cigarettes do you smoke (or used to smoke) per week?       cigarettes

8  N/A, specify \_\_\_\_\_      9  D/K      99  N/R

4.7e. Have you smoked more than 100 cigarettes in your lifetime?

0  NO      1  YES      9  D/K      99  N/R

4.8. Have you ever smoked a ganja / marijuana / weed?

0  NO      1  YES      9  D/K      99  N/R **(If you have never smoked ganja go to question 4.9)**

4.8a How old were you when you smoked ganja for the first time?  yrs      9  D/K      99  N/R

4.8b. In the past month, on how many days did you smoke ganja?

0  None      1  Less than once/week      3  1-2days /week      4  3-4days/week

5  5 or more days/week      9  DK      99  NR

4.8c. On average, how many spliffs do you smoke (or used to smoke) per week?

spliffs      9  D/K      99  N/R

4.9. Do you use ganja in any form apart from smoking? **(If no, go to question 4.10)**

0  NO      1  YES      9  DK      99  NR

4.9a. What are the other forms? **PROMPT**      **MULITPLE RESPONSES ALLOWED**

1  Tea      2  Used in cooking      3  Other, specify \_\_\_\_\_      9  D/K      99  N/R

4.10. Have you ever had alcohol to drink?      1  YES      0  NO      9  D/K      99  N/R

(Includes beer, wine, rum, brandy etc, but no alcohol in cakes or drinks such as sorrel)

**(If you have never had alcohol, go to question 4.11)**

4.10a. How old were you when you drank alcohol for the first time?  yrs      9  D/K      99  N/R

4.10b. In the past month, on how many days did you drink alcohol?

0  None      1  < once/wk      2  1-2days /wk      3  3-4days/wk  
 4  ≥5days/wk      9  D/K      99  N/R

4.10c. On average how many drinks do you have per week?

8  N/A, specify \_\_\_\_\_ 9  D/K      99  N/R

**(One drink of alcohol is any of: 1 bottle (12 oz) beer/stout; 1 glass (4 oz) wine; 1 drink (1 oz) spirit)**

4.10d. (**Males only**) Have you ever had more than 5 drinks at one session?

0  NO      1  YES      9  D/K      99  N/R

4.10e. (**Females**) Have you ever had more than 4 drinks at one session?

0  NO      1  YES      9  D/K      99  N/R

4.10f. How often do you have a drinking binge?

**(i.e. more than 5 drinks/session for males or 4 drinks/session for females)**

1  <once/mth    2  1-2 times/mth    3  3-4 times/mth    4  ≥5 times/mth    9  D/K    99  N/R

4.10g. What is the maximum number of drinks you have had in one day?  9  D/K    99  N/R

4.10f. What type of alcoholic drink do you have most of the time? (select only one)

1  beer      2  stout      3  wine      4  rum      5  brandy  
 6  vodka      7  other, specify \_\_\_\_\_      9  DK      99  NR

4.11 Have you ever used any of the following drugs?

a. Cocaine      0  NO      1  YES      9  DK      99  NR  
 b. Crack       NO      1  YES      9  DK      99  NR  
 c. heroin, morphine       NO      1  YES      9  DK      99  NR

4.11a. Have you used any of the following drugs in the past month?

a. Cocaine      0  NO      1  YES      9  DK      99  NR  
 b. Crack      0  NO      1  YES      9  DK      99  NR  
 c. heroin, morphine      0  NO      1  YES      9  DK      99  NR

4.11b Have you ever injected drugs\* into any part of your body with a needle? (\* other than drugs prescribed by a doctor to treat a medical condition)

0  NO      1  YES      9  DK      99  NR      **( If no, go to question 4.12)**

If yes, give the name of the drug(s): \_\_\_\_\_

4.11c If yes to 4.11b, have you ever shared needles used to inject drugs with another person?

0  NO      1  YES      9  DK      99  NR

Case ID#

Interviewer's ID #

Impact of Early Life Experiences on Cardio- Respiratory Risk and Bone mineral Density in Jamaican Adolescents

**INJURY & VIOLENCE**

4.12. When traveling in a motor vehicle, do you use the seat belt?

0  never    1  infrequently(rarely)    2  frequently(most times)    3  always    99  NR

4.12a. When riding a motorcycle or pedal cycle, do you use a protective helmet?

0  never    1  infrequently(rarely)    2  frequently(most times)    3  always    99  NR

4.12b. In the past three years, have you been involved in any motor vehicle accident?

0  NO    1  YES    9  DK    99  NR

4.12c. In the past three years, have you been injured in a motor vehicle accident?

0  NO    1  YES    9  DK    99  NR

4.12d. In the past three years, have you been involved in any fights or been attacked by anyone?

0  NO    1  YES    9  DK    99  NR

4.12e. In the past three years, have you been injured in a fight or in an attack by anyone?

0  NO    1  YES    9  DK    99  NR

4.12f Do you carry any object or weapon to protect yourself from being attacked by other persons?

0  NO    1  YES    9  DK    99  NR

**Section 5: Socioeconomic Status**

5.1. Who do you live with? (Choose only one) 1  MOTHER 2  FATHER  
 3  BOTH PARENTS 4  SELF 5  SPOUSE  
 7  OTHER, specify \_\_\_\_\_ 9  DK 99  NR

5.2. Who is mainly responsible to provide for you financially?  
 1  father 2  mother 3  both father & mother 4  guardian 5  self  
 6  spouse 7  other, specify \_\_\_\_\_ 9  DK 99  NR

5.3. What is the occupation of your father? \_\_\_\_\_ 9  DK 99  NR

5.4. What is the occupation of your mother? \_\_\_\_\_ 9  DK 99  NR

5.5. If your primary financial support is not your mother or father, what is the occupation of this person?  
 \_\_\_\_\_ 9  DK 99  NR

5.6. What is the highest education level of your mother, father or guardian/financial provider?

**a. Mother:** 0  never attended school 1  basic school only 2  primary/all-age  
 3  secondary/high/technical 4  Tertiary- College/University 9  DK 99  NR

**b. Father:** 0  never attended school 1  basic school only 2  primary/all-age  
 3  secondary/high/technical 4  Tertiary- College/University 9  DK 99  NR

**c. guardian:** 0  never attended school 1  basic school only 2  primary/all-age  
 3  secondary/high/technical 4  Tertiary- College/University 8  N/A 9  DK 99  NR

5.7. Who is considered the head of your household (major wage earner)?

1  father 2  mother 3  guardian 4  self 5  spouse  
 7  other, specify \_\_\_\_\_ 9  DK 99  NR

5.8. What is the occupation of your household head (major wage earner)?

\_\_\_\_\_ 9  Don't Know

5.9. Are you currently working for pay? 0  NO 1  YES 9  DK 99  NR

If yes, what type of work do you do? \_\_\_\_\_

5.10. Have you worked for pay in the past? 0  NO 1  YES 9  DK 99  NR

If yes, what type of work did you do? \_\_\_\_\_

Case ID#

Interviewer's ID #

Impact of Early Life Experiences on Cardio-Respiratory Risk and Bone mineral Density in Jamaican Adolescents

5.11. Are you now attending school, college or university?

0  NO      1  YES      9  DK      99  NR

If yes,

a. State institution \_\_\_\_\_

b. Who is paying for your studies? 1  father      2  mother      3  both mother & father  
4  guardian      5  other, specify \_\_\_\_\_

5.12. Do you have additional sources of income?

0  NO      1  YES      9  DK      99  NR

a. If yes, state source \_\_\_\_\_

5.13. What is the average combined monthly income of your household (mother, father, guardian, self, etc)?

|                            |                     |                             |            |
|----------------------------|---------------------|-----------------------------|------------|
| 1 <input type="checkbox"/> | Less than J\$ 4,000 | 9 <input type="checkbox"/>  | DK         |
| 2 <input type="checkbox"/> | J\$ 4,001 – 10,000  | 99 <input type="checkbox"/> | NR/Refused |
| 3 <input type="checkbox"/> | J\$ 10,001 – 20,000 |                             |            |
| 4 <input type="checkbox"/> | J\$ 20,001 – 40,000 |                             |            |
| 5 <input type="checkbox"/> | J\$ 40,001 – 80,000 |                             |            |
| 6 <input type="checkbox"/> | >J\$ 80,000         |                             |            |

5.14. What is your current monthly income?

|                            |                     |                             |             |
|----------------------------|---------------------|-----------------------------|-------------|
| 1 <input type="checkbox"/> | Less than J\$ 4,000 | 6 <input type="checkbox"/>  | >J\$ 80,000 |
| 2 <input type="checkbox"/> | J\$ 4,001 – 10,000  | 7 <input type="checkbox"/>  | not working |
| 3 <input type="checkbox"/> | J\$ 10,001 – 20,000 | 9 <input type="checkbox"/>  | DK          |
| 4 <input type="checkbox"/> | J\$ 20,001 – 40,000 | 99 <input type="checkbox"/> | NR/Refused  |
| 5 <input type="checkbox"/> | J\$ 40,001 – 80,000 |                             |             |

5.15. What type of house do you live in?

1  concrete      2  board/wood      3  other, specify \_\_\_\_\_  
9  DK      99  NR

5.16. How many bedrooms (used for sleeping) are in your house?  9  DK      99  NR

5.17. How many other rooms (living room or other habitable room) are in your house?

     9  DK      99  NR

5.18. Is the house that you live in rented or owned by the family

1  owned by parent(s)/guardian      2  rented      3  family home (owned by other family)  
4  other, specify \_\_\_\_\_      9  DK      99  NR

5.19. How many adults (≥18yrs) including yourself, live in the same house with you?



Case ID#

Interviewer's ID #

Impact of Early Life Experiences on Cardio- Respiratory Risk and Bone mineral Density in Jamaican Adolescents

5.20. How many children (under 18 yrs old) live in the same house with you? \_\_\_\_\_

5.21. Which of the following do you have working in your home?

- |                               |                               |                                |                                |                                 |
|-------------------------------|-------------------------------|--------------------------------|--------------------------------|---------------------------------|
| 1. Television set             | 0 <input type="checkbox"/> NO | 1 <input type="checkbox"/> YES | 9 <input type="checkbox"/> D/K | 99 <input type="checkbox"/> N/R |
| 2. Cable/Satellite connection | 0 <input type="checkbox"/> NO | 1 <input type="checkbox"/> YES | 9 <input type="checkbox"/> D/K | 99 <input type="checkbox"/> N/R |
| 3. Gas / electric stove       | 0 <input type="checkbox"/> NO | 1 <input type="checkbox"/> YES | 9 <input type="checkbox"/> D/K | 99 <input type="checkbox"/> N/R |
| 4. Refrigerator               | 0 <input type="checkbox"/> NO | 1 <input type="checkbox"/> YES | 9 <input type="checkbox"/> D/K | 99 <input type="checkbox"/> N/R |
| 5. Freezer                    | 0 <input type="checkbox"/> NO | 1 <input type="checkbox"/> YES | 9 <input type="checkbox"/> D/K | 99 <input type="checkbox"/> N/R |
| 6. Living room set            | 0 <input type="checkbox"/> NO | 1 <input type="checkbox"/> YES | 9 <input type="checkbox"/> D/K | 99 <input type="checkbox"/> N/R |
| 7. Stereo equipment           | 0 <input type="checkbox"/> NO | 1 <input type="checkbox"/> YES | 9 <input type="checkbox"/> D/K | 99 <input type="checkbox"/> N/R |
| 8. Washing machine            | 0 <input type="checkbox"/> NO | 1 <input type="checkbox"/> YES | 9 <input type="checkbox"/> D/K | 99 <input type="checkbox"/> N/R |
| 9. Cars or other vehicles     | 0 <input type="checkbox"/> NO | 1 <input type="checkbox"/> YES | 9 <input type="checkbox"/> D/K | 99 <input type="checkbox"/> N/R |
| 10. Telephone                 | 0 <input type="checkbox"/> NO | 1 <input type="checkbox"/> YES | 9 <input type="checkbox"/> D/K | 99 <input type="checkbox"/> N/R |
| 11. VCR (video player)        | 0 <input type="checkbox"/> NO | 1 <input type="checkbox"/> YES | 9 <input type="checkbox"/> D/K | 99 <input type="checkbox"/> N/R |
| 12. DVD/CD                    | 0 <input type="checkbox"/> NO | 1 <input type="checkbox"/> YES | 9 <input type="checkbox"/> D/K | 99 <input type="checkbox"/> N/R |
| 13. Computer                  | 0 <input type="checkbox"/> NO | 1 <input type="checkbox"/> YES | 9 <input type="checkbox"/> D/K | 99 <input type="checkbox"/> N/R |
| 14. Internet connection       | 0 <input type="checkbox"/> NO | 1 <input type="checkbox"/> YES | 9 <input type="checkbox"/> D/K | 99 <input type="checkbox"/> N/R |
| 15. Radio/cassette player     | 0 <input type="checkbox"/> NO | 1 <input type="checkbox"/> YES | 9 <input type="checkbox"/> D/K | 99 <input type="checkbox"/> N/R |
| 16. Microwave oven            | 0 <input type="checkbox"/> NO | 1 <input type="checkbox"/> YES | 9 <input type="checkbox"/> D/K | 99 <input type="checkbox"/> N/R |
| 17. Air-conditioning          | 0 <input type="checkbox"/> NO | 1 <input type="checkbox"/> YES | 9 <input type="checkbox"/> D/K | 99 <input type="checkbox"/> N/R |

5.22. What type of toilet facilities do you use at home?

- |                                                              |                                                                |
|--------------------------------------------------------------|----------------------------------------------------------------|
| 1 <input type="checkbox"/> none                              | 2 <input type="checkbox"/> hole in the ground                  |
| 3 <input type="checkbox"/> pit latrine, shared               | 4 <input type="checkbox"/> pit latrine, unshared               |
| 5 <input type="checkbox"/> water closet (flush type), shared | 6 <input type="checkbox"/> water closet (flush type), unshared |
| 7 <input type="checkbox"/> other, specify _____              | 9 <input type="checkbox"/> DK                                  |
| 99 <input type="checkbox"/> NR                               |                                                                |

5.22. What is your source of water?

- |                                           |                                                  |                                                 |
|-------------------------------------------|--------------------------------------------------|-------------------------------------------------|
| 1 <input type="checkbox"/> stream/river   | 2 <input type="checkbox"/> catchment (drum etc.) | 3 <input type="checkbox"/> standpipe            |
| 4 <input type="checkbox"/> piped, in yard | 5 <input type="checkbox"/> piped, in house       | 6 <input type="checkbox"/> other, specify _____ |
| 9 <input type="checkbox"/> DK             | 99 <input type="checkbox"/> NR                   |                                                 |

Case ID#

Interviewer's ID #

Impact of Early Life Experiences on Cardio- Respiratory Risk and Bone mineral Density in Jamaican Adolescents

5.23. What is the usual source of light in your home?

- 1  electricity      2  kerosene lamp      3  candle      4  other, specify \_\_\_\_\_  
9  DK      99  NR

5.24. What type of cooking facilities do you have at home?

- 1  wood      2  coal stove      3  kerosene stove      4  gas stove / electric stove  
5  other, specify \_\_\_\_\_      9  DK      99  NR

5.25. How many **miles walking distance** are the following from your house?

- |                          |                               |                                |                                |                                 |                                |                                      |
|--------------------------|-------------------------------|--------------------------------|--------------------------------|---------------------------------|--------------------------------|--------------------------------------|
| a. Public Transportation | 1 <input type="checkbox"/> <1 | 2 <input type="checkbox"/> 1-2 | 3 <input type="checkbox"/> 3-4 | 4 <input type="checkbox"/> 5-10 | 5 <input type="checkbox"/> >10 | 9 <input type="checkbox"/> Not Known |
| b. Bank                  | 1 <input type="checkbox"/> <1 | 2 <input type="checkbox"/> 1-2 | 3 <input type="checkbox"/> 3-4 | 4 <input type="checkbox"/> 5-10 | 5 <input type="checkbox"/> >10 | 9 <input type="checkbox"/> Not Known |
| c. Market/Supermarket    | 1 <input type="checkbox"/> <1 | 2 <input type="checkbox"/> 1-2 | 3 <input type="checkbox"/> 3-4 | 4 <input type="checkbox"/> 5-10 | 5 <input type="checkbox"/> >10 | 9 <input type="checkbox"/> Not Known |
| d. Primary school        | 1 <input type="checkbox"/> <1 | 2 <input type="checkbox"/> 1-2 | 3 <input type="checkbox"/> 3-4 | 4 <input type="checkbox"/> 5-10 | 5 <input type="checkbox"/> >10 | 9 <input type="checkbox"/> Not Known |
| e. Post Office           | 1 <input type="checkbox"/> <1 | 2 <input type="checkbox"/> 1-2 | 3 <input type="checkbox"/> 3-4 | 4 <input type="checkbox"/> 5-10 | 5 <input type="checkbox"/> >10 | 9 <input type="checkbox"/> Not Known |
| f. Health Centre/Doctor  | 1 <input type="checkbox"/> <1 | 2 <input type="checkbox"/> 1-2 | 3 <input type="checkbox"/> 3-4 | 4 <input type="checkbox"/> 5-10 | 5 <input type="checkbox"/> >10 | 9 <input type="checkbox"/> Not Known |
| g. Police Station        | 1 <input type="checkbox"/> <1 | 2 <input type="checkbox"/> 1-2 | 3 <input type="checkbox"/> 3-4 | 4 <input type="checkbox"/> 5-10 | 5 <input type="checkbox"/> >10 | 9 <input type="checkbox"/> Not Known |

**Attitudes towards Fatness**

*The table below contains statements about fatness. Kindly state if you agree or disagree with each of the statement below.*

|                                                                                 | <b>Strongly disagree<br/>1</b> | <b>Disagree<br/>2</b> | <b>Agree<br/>3</b> | <b>Strongly agree<br/>4</b> |
|---------------------------------------------------------------------------------|--------------------------------|-----------------------|--------------------|-----------------------------|
| Men love fat women.                                                             |                                |                       |                    |                             |
| Most fat individuals have little ambition                                       |                                |                       |                    |                             |
| I would prefer a normal weight person rather than a fat person to be my friend. |                                |                       |                    |                             |
| Slim people are healthier than fat persons                                      |                                |                       |                    |                             |
| Fat people are lazy.                                                            |                                |                       |                    |                             |
| Fat individuals exercise less than normal weight persons.                       |                                |                       |                    |                             |
| Slim people are more popular than fat people.                                   |                                |                       |                    |                             |
| Fatness in older persons is more acceptable than in younger persons.            |                                |                       |                    |                             |
| Most fat adolescents play fewer active games than normal weight adolescents.    |                                |                       |                    |                             |
| Fat persons are greedy.                                                         |                                |                       |                    |                             |
| Fat persons eat a lot of fatty foods.                                           |                                |                       |                    |                             |
| Less emphasis should be placed on fatness as a health problem.                  |                                |                       |                    |                             |

2. How satisfied are you with your weight?
  1.  Satisfied
  2.  Not satisfied
  
3. In relation to your height, do you think you are ....
 

|                                                 |                                                       |
|-------------------------------------------------|-------------------------------------------------------|
| 1. <input type="checkbox"/> underweight         | 2. <input type="checkbox"/> right weight              |
| 3. <input type="checkbox"/> a little overweight | 4. <input type="checkbox"/> very overweight or obese. |
  
4. At present, are you doing anything to change your weight?
  1.  I am trying to gain weight
  2.  I am trying to lose weight
  3.  I am not doing anything about my weight.

**SECTION 6: DIETARY HABITS & BODY IMAGE/ PERCEPTION**

6.1 Are you on a special diet whether for religious or medical or other reasons?

0  NO      1  YES      9  DK      99  NR6.1a If yes: (**multiple responses allowed**)Vegetarian      0  NO      1  YES      99  NRWeight loss      0  NO      1  YES      99  NRWeight gain      0  NO      1  YES      99  NRDiabetic      0  NO      1  YES      99  NRLow salt      0  NO      1  YES      99  NRLow fat      0  NO      1  YES      99  NRLow cholesterol      0  NO      1  YES      99  NROther      0  NO      1  YES      99  NR6.1b. Which is the most important source of information on nutrition to you? (**Select one only**)Radio      1 T.V.      2 Brochures/Pamphlets      3 Doctor/Nurse      4 Dietitian/Nutritionist      5 Health related organization      6 Friend/relative      7 Don't Know      9 No Response      99 

6.2 How many times per week do you eat at a fast food outlet?

0  Never      1  1-2 times/week      2  3-4 times/week      3  5-6 times/week      4  everyday9  DK      99  NR*I am now going to show you some drawings of different body types.***In Women**6.3a. Which images do you think correspond to a normal body size and shape?  - 6.3b Which body image do you think people find most attractive? 6.3c. Which body image do you think is most healthy? 6.3d Which of these images do you think corresponds most to your current body size and shape? 6.3e Which of these images is closest to the size and shape you would most like to be? **In Men**6.3f Which of these images do you think correspond to a normal body size and shape?  - 6.3g. Which body image do you think people find most attractive? 6.3h. Which body image do you think is most healthy? 6.3i Which of these images do you think corresponds most to your current body size and shape? 6.3j Which of these images is closest to the size and shape you would most like to be? **Duration of Interviews**       hrs  min

Case ID# Interviewer's ID # Impact of Early Life Experiences on Cardio- Respiratory Risk and Bone mineral Density in Jamaican Adolescents**SECTION 7: BODY MEASUREMENTS****NAME OF PARTICIPANT:** \_\_\_\_\_

Now I am going to measure your height, weight, and waist and hip measurements. I will explain each one as we do it.

|                                                                                                                                |                                                                                                                                                                                                                                                                                                                                                                                                                                                                                                                                 |
|--------------------------------------------------------------------------------------------------------------------------------|---------------------------------------------------------------------------------------------------------------------------------------------------------------------------------------------------------------------------------------------------------------------------------------------------------------------------------------------------------------------------------------------------------------------------------------------------------------------------------------------------------------------------------|
| 6.1 WEIGHT<br>RECORD SCALE IDENTIFICATION NUMBER                                                                               | <input type="text"/> <input type="text"/> <input type="text"/> <input type="text"/> . <input type="text"/> <input type="text"/> Kg<br><input type="text"/> <input type="text"/>                                                                                                                                                                                                                                                                                                                                                 |
| 6.2 HEIGHT                                                                                                                     | <input type="text"/> <input type="text"/> <input type="text"/> <input type="text"/> . <input type="text"/> <input type="text"/> cm                                                                                                                                                                                                                                                                                                                                                                                              |
| 6.3 WAIST CIRCUMFERENCE<br>(Mid-point between lowest rib and iliac crest)<br><br>Over what clothing was the measurement taken? | 1. <input type="text"/> <input type="text"/> <input type="text"/> <input type="text"/> . <input type="text"/> <input type="text"/> cm<br>2. <input type="text"/> <input type="text"/> <input type="text"/> <input type="text"/> . <input type="text"/> <input type="text"/> cm<br>3. <input type="text"/> <input type="text"/> <input type="text"/> <input type="text"/> . <input type="text"/> <input type="text"/> cm<br><br>0 [ ] No clothing: skin<br>1 [ ] Shirt or dress<br>2 [ ] Trousers only<br>3 [ ] Shirt & trousers |
| 6.4 BUTTOCKS (HIP) CIRCUMFERENCE<br>(At the level of greater trochanter)<br><br>Over what clothing was the measurement taken?  | 1. <input type="text"/> <input type="text"/> <input type="text"/> <input type="text"/> . <input type="text"/> <input type="text"/> cm<br>2. <input type="text"/> <input type="text"/> <input type="text"/> <input type="text"/> . <input type="text"/> <input type="text"/> cm<br>3. <input type="text"/> <input type="text"/> <input type="text"/> <input type="text"/> . <input type="text"/> <input type="text"/> cm<br><br>0 [ ] No clothing: skin<br>1 [ ] Shirt or dress<br>2 [ ] Trousers only<br>3 [ ] Shirt & trousers |
| Thickness of upper body covering:                                                                                              | 0 [ ] None                      1 [ ] Thin<br>2 [ ] Thick                                                                                                                                                                                                                                                                                                                                                                                                                                                                       |
| Thickness of lower body covering:                                                                                              | 0 [ ] None                      1 [ ] Thin<br>2 [ ] Thick                                                                                                                                                                                                                                                                                                                                                                                                                                                                       |

**6.5 Skin-fold thickness**a. Triceps mm  
c. Subscapular mmb. Biceps mm  
d. suprailiac mm



Case ID#

Interviewer's ID #

Impact of Early Life Experiences on Cardio- Respiratory Risk and Bone mineral Density in Jamaican Adolescents

**SECTION 9: PULSE AND BLOOD PRESSURE MEASUREMENT**

NAME OF PARTICIPANT: \_\_\_\_\_

Now I will explain the procedure for measuring your pulse and blood pressure. It is important that you remain relaxed and seated for the measurement which will take about 15 minutes. Please do not cross your feet or legs during the measurements. I will wrap the blood pressure cuff around your arm, take your pulse and then inflate the cuff. You will feel a sensation of pressure on your arm when the cuff is inflated. I will be inflating the cuff a maximum of 5 times. While I am measuring your blood pressure, it is best if we do not talk. If you have any questions, I will be happy to answer them for you before or after the measurement is taken. I will tell you the results of the measurements afterward.

**Record Baumanometer Identification #**

|                                                                                                                    |                                                                                                                      |
|--------------------------------------------------------------------------------------------------------------------|----------------------------------------------------------------------------------------------------------------------|
| 1. Have you had any food, alcohol, coffee or cigarettes within the last 30 minutes?                                | Food: 0 [ ] N 1 [ ] Y<br>Alcohol: 0 [ ] N 1 [ ] Y<br>Coffee: 0 [ ] N 1 [ ] Y<br>Cigarettes: 0 [ ] N 1 [ ] Y          |
| 2. Arm circumference:<br>(Mid-point between inferior border of the olecranon & the lateral projection of acromion) | _ _ _ _  .  _ _ _                                                                                                    |
| 3. Cuff size selected:                                                                                             | 0 [ ] Small adult 9 (17 – 25 cm)<br>1 [ ] Adult (25 – 35 cm)<br>2 [ ] Large (31 – 40 cm)<br>3 [ ] Thigh (38 – 50 cm) |
| 4. Arm selected:<br>(Preferably right arm)                                                                         | 0 [ ] Right<br>1 [ ] Left _____<br>Reason                                                                            |
| 5. Pulse rate for 30 seconds:                                                                                      | _ _ _ _                                                                                                              |
| 6. Pulse regular?                                                                                                  | 1 [ ] Yes<br>1 [ ] No                                                                                                |
| 7. Pulse Obliteration Pressure (POP):                                                                              | _ _ _ _                                                                                                              |
| 8. Maximum inflation level: POP + 30 mmHg=                                                                         | _ _ _ _                                                                                                              |
| 9. First blood pressure measurement:<br>0 [ ] BP refused – Reason : _____<br>1 [ ] BP not done – Reason: _____     | _ _ _ _  /  _ _ _ _ <br>SBP DBP                                                                                      |
| 10. Pulse rate for 30 seconds:                                                                                     | _ _ _ _                                                                                                              |
| 11. Second blood pressure measurement:                                                                             | _ _ _ _  /  _ _ _ _ <br>SBP DBP                                                                                      |
| 12. Pulse rate for 30 seconds:                                                                                     | _ _ _ _                                                                                                              |
| 13. Third blood pressure measurement:                                                                              | _ _ _ _  /  _ _ _ _ <br>SBP DBP                                                                                      |

Case ID#

Interviewer's ID #

Impact of Early Life Experiences on Cardio- Respiratory Risk and Bone mineral Density in Jamaican Adolescents

### SECTION 10: URINE COLLECTION DATA

*NAME OF PARTICIPANT:* \_\_\_\_\_

- 9.1 Time of bladder first emptying / starting time of timed collection :  AM
- 9.2 Time of second micturition / end of timed collection :  AM/PM  
(circle the correct option)
- 9.3 Time of final collection if different from 2<sup>nd</sup> :  AM/PM
- 9.4 Volume of urine passed ml
- 9.5 Volume of urine collected for processing ml



Case ID#

Interviewer's ID #

Impact of Early Life Experiences on Cardio- Respiratory Risk and Bone mineral Density in Jamaican Adolescents

**SECTION 11: LABORATORY RESULTS**

*NAME OF PARTICIPANT:* \_\_\_\_\_

10.1. Fasting blood glucose . mmol/L

10.2. Glycosylated haemoglobin . %

10.3. Total cholesterol . mmol/L

10.4. LDL cholesterol . mmol/L

10.5. HDL cholesterol . mmol/L

10.6. Triglycerides . mmol/L

10.7. Fasting insulin .

10.8. Haemoglobin . x 10<sup>9</sup>/L

10.9. Packed cell volume . %

10.10. White cell count . x 10<sup>9</sup>/L

10.11. Platelet count . x 10<sup>9</sup>/L

10.12. Sodium . mmol/L

10.13. Potassium . mmol/L

10.14. Chloride . mmol/L

10.15. Bicarbonate . mmol/L

10.16. Urea . mmol/L

10.17. Creatinine . mmol/L

10.18. high sensitivity C-reactive protein .

Case ID#

Interviewer's ID #

Impact of Early Life Experiences on Cardio- Respiratory Risk and Bone mineral Density in Jamaican Adolescents

**SECTION 11Cont: LABORATORY RESULTS**

*NAME OF PARTICIPANT:* \_\_\_\_\_

10.19. Serum Ferritin .

10.20. Apolipoprotein B-100 .

10.21 Interleukin 6

10.22 Soluble intercellular adhesion molecule .

(type 1)

10.22 Homocysteine .

10.23 Microalbuminuria

10.24 Urinary sodium

Case ID#

Interviewer's ID #

Impact of Early Life Experiences on Cardio- Respiratory Risk and Bone mineral Density in Jamaican Adolescents

**SECTION 12: BONE MINERAL DENSITY DATA**

11.1. NAME: \_\_\_\_\_

11.2 Sex:  Male  Female

**11.3. Bone Mineral Density result**

**(1) T-score**

**a. Right Heel** .

**b. Left Heel** .

**(2) Stiffness Index**

**a. Right Heel** \_\_\_\_\_

**b. Left Heel** \_\_\_\_\_
