# Supplementary material for: Factors associated with elevated blood pressure or hypertension in Afro-Caribbean youth: a cross-sectional study
Source: PeerJ. 2018 Feb 13;6:e4385. doi: 10.7717/peerj.4385 (PMC5815333; doi:10.7717/peerj.4385)
Supplement: Supplemental Information 3 [file peerj-06-4385-s003.xlsx]

## Sheet: Sheet1
num	q112age	q71wgt	q72hgt	q1117cre	waist_idf	lowhdl	bmi	bmicat4	mn23sbp2	mn23dbp2	waistcirc2	hipcirc	whr	inc_ldl	fastglu	fast_ins	fast_chol	fast_hdl	fast_ldl	fast_trig	htn	smoke_current	high_chol	glucat_quin5	chol_hdl_ratio	phys_act_level2	sex	alcoholcat	trigcat_quin5	highbp_120_80	famhx_htn	whtr	wbc_count	albumin_urine	micro_alb	gfr_lyon	log_gfr_lyon	ckd	ganja_current	binge	hscrp_mn2	highest_ed_new	occ_cat1a_new	possession_cat	waist_glucose	waist_trig	waist_glucose_trig	log_insulin	log_insulin_quin5
1	19	81.7	180.1	57.6	No	No	25.1881	25-29.99 kg/m.sq	101	72	79.9	109.3	0.731016	No	4.4	6.8	5.1	1.36	3.41431	0.71	No	No	No	No	3.75	Moderate PAL	female	Rarely Drinks Alcohol	No	No	Yes	0.443642	7.2	3.2	No	103.182	4.6365	No	No	No	2.8	Secondary	Skilled	10-14	No	No	No	1.91692	No
2	18	54.8	172.5	48	No	Yes	18.4163	<18.5 kg/m.sq.	104	59	66	84.9	0.777385	No	4.3	7.9	4.5	1.18	3.07229	0.54	No	No	No	No	3.81356	Moderate PAL	female	Rarely Drinks Alcohol	No	No	No	0.382609	6	5.4	No	118.594	4.7757	No	No	No	0.3	Tertiary	Highly Skilled	15-17	No	No	No	2.06686	No
3	19	57.7	166	38.8	No	Yes	20.9392	18.5-24.99 kg/m.sq	109	73	69.6	93.2333	0.746514	No	4.3	8.6	4.6	1.15	3.20688	0.53	No	No	No	No	4	Low PAL	female	Rarely Drinks Alcohol	No	No	No	0.419277	7.1	1.6	No	141.186	4.95008	No	No	No	0.9	Tertiary	Skilled	10-14	No	No	No	2.15176	No
4	19	63.3	152.9		No		27.0763	25-29.99 kg/m.sq	98	60	78.4	97.4	0.804928								No	No				Moderate PAL	female			No	Yes	0.512753							No					0-9	No	No	No		No
5	18	56.3	164.9	68.6	No	Yes	20.7046	18.5-24.99 kg/m.sq	94	57	67.8	89	0.761798	No	4.3	4.9	5.3	1.01	3.97807	0.68	No	No	Yes	No	5.24753	Moderate PAL	female	Rarely Drinks Alcohol	No	No	Yes	0.411158	7.3	2.7	No	79.3251	4.37355	No	No	No	4.4	Secondary	Semi/Unskilled	10-14	No	No	No	1.58924	No
6	20	69.3	157.6	57.6	Yes	Yes	27.9011	25-29.99 kg/m.sq	119	61	80.5333	110.533	0.728589	No	4.2	8	2.4	1.16	1.10697	0.29	No	No	No	No	2.06897	Low PAL	female	Drinks Alcohol 3 or more times/week	No	No		0.510998	7.5	2.5	No	90.2917	4.50305	No	No	Yes	5.5	Secondary	Semi/Unskilled	0-9	No	No	No	2.07944	No
7	20	102.3	164.9	51.4	Yes	Yes	37.6213	>=30 kg/m.sq	130	79	116.133	124.433	0.933298	No	4.6	14.8	5.5	1.23	3.89385	0.82	No	No	Yes	No	4.47154	Moderate PAL	female	Rarely Drinks Alcohol	Yes	Yes		0.704265	7.6	2.5	No	105.87	4.66221	No	No	No		Secondary	Semi/Unskilled	10-14	No	Yes	No	2.69463	Yes
8	19	54	156.7	35.6	No	No	21.9915	18.5-24.99 kg/m.sq	102	56	69.6333	91.5	0.76102	Yes	4		6.5	1.62	4.64147	0.52	No	No	Yes	No	4.01235	Low PAL	female	Rarely Drinks Alcohol	No	No		0.444374	7.6	45.4	Yes	145.256	4.9785	Yes	No		1.45	Secondary	Semi/Unskilled	0-9	No	No	No		No
9	18	70.4	157.7	24.5	Yes	Yes	28.308	25-29.99 kg/m.sq	114	76	93	97.3	0.955807	No	4.6	8.3	4.6	1.13	3.04798	0.92	No	No	No	No	4.0708	High PAL	female	Drinks Alcohol 1-2 times/week	Yes	No	Yes	0.589727	5.2	1.5	No	212.412	5.35853	No	No	No	4		Skilled	10-14	No	Yes	No	2.11626	No
10	19	97.6	163.5	73.1	Yes	Yes	36.5102	>=30 kg/m.sq	101	60	92.3	118.967	0.775848	No	5.2		4.1	1.15	2.78486	0.36	No	No	No	Yes	3.56522	High PAL	female	Rarely Drinks Alcohol	No	No	Yes	0.564526	7	24	No	73.8099	4.30149	No	No	No	4.25	Tertiary		10-14	Yes	No	No		No
11	18	61	165		No		22.4059	18.5-24.99 kg/m.sq	113	72	72.7333	95.8333	0.758956								No	No				Moderate PAL	female	Drinks Alcohol 1-2 times/week		No	Yes	0.440808							No	No		Secondary	Highly Skilled	15-17	No	No	No		No
12	19	50.3	147.9	91.8	No	No	22.9949	18.5-24.99 kg/m.sq	118	60	63.2667	92.3333	0.685199	No	4.3	5.9	3.9	1.33	2.23514	0.73	No	No	No	No	2.93233	Low PAL	female	Rarely Drinks Alcohol	No	No	Yes	0.427767	7.9	3.6	No	53.1667	3.97343	Yes	No	No	0.5	Tertiary	Skilled	10-14	No	No	No	1.77495	No
13	19	83.7	156.4	66.9	Yes	No	34.2178	>=30 kg/m.sq	108	53	92.9333	115	0.808116	No	4.7	12.5	4.2	1.72	2.22771	0.55	No	No	No	No	2.44186	Low PAL	female	Drinks Alcohol 1-2 times/week	No	No	No	0.594203	8.2	24.2	No	77.148	4.34573	No	No	No	2.15		Skilled	15-17	No	No	No	2.52573	Yes
14	19	43.4	158.3	48.1	No	No	17.3192	<18.5 kg/m.sq.	95	66	60.0667	83.7	0.717642	No	3.9	6.2	4.5	1.45	2.82982	0.48	No	Yes	No	No	3.10345	Moderate PAL	female	Drinks Alcohol 3 or more times/week	No	No		0.379448		24.8	No	108.605	4.68772	No	No	No	0.35	Primary/All Age	Skilled	10-14	No	No	No	1.82455	No
15	19	48.4	165.3	48.2	No	Yes	17.7133	<18.5 kg/m.sq.	120	72	66.8667	89.7667	0.744894	No	4.4	14.8	4.2	0.93	2.99477	0.6	No	No	No	No	4.51613	Moderate PAL	female	Rarely Drinks Alcohol	No	Yes	No	0.404517	10.5	8.5	No	113.172	4.72891	No	No	Yes	0.3	Tertiary	Highly Skilled	15-17	No	No	No	2.69463	Yes
16	19	67.2	168	54.5	No	No	23.8095	18.5-24.99 kg/m.sq	109	71	69.5	100.367	0.692461	No	4.7	3.7	3.6	1.73	1.70028	0.37	No	No	No	No	2.08092	Moderate PAL	female	Drinks Alcohol 1-2 times/week	No	No		0.41369	3	3	No	101.725	4.62227	No	No	No	0.5	Tertiary	Highly Skilled	0-9	No	No	No	1.30833	No
17	19	62.3	158.4	38.8	No	Yes	24.8301	18.5-24.99 kg/m.sq	118	65	78.9	96.3	0.819315	No	5.9	13.7	4.5	1.06	3.27486	0.36	No	No	No	Yes	4.24528	Low PAL	female	Never Drank Alcohol	No	No	No	0.498106	9.1	2.5	No	134.722	4.90321	No	No			Tertiary	Skilled	10-14	No	No	No	2.6174	Yes
18	20	52.3	159.5	60.7	No	No	20.558	18.5-24.99 kg/m.sq	114	69	62.7333	89.7333	0.699108	No	5	12.9	4.2	1.79	2.25862	0.33	No	Yes	No	Yes	2.34637	Moderate PAL	female	Rarely Drinks Alcohol	No	No	No	0.393312	8.5	2.5	No	86.7133	4.46261	No	No	Yes	0.8	Secondary	Skilled	10-14	No	No	No	2.55723	Yes
19	19	89.3	168.7	66.9	Yes	Yes	31.3777	>=30 kg/m.sq	119	71	96.4	114.6	0.841187	No	3.9	69	4.4	1.26	2.86936	0.59	No	Yes	No	No	3.49206	Low PAL	female	Drinks Alcohol 1-2 times/week	No	No	No	0.571429	3.8	7	No	83.2152	4.42143	No	No	No	7.75		Skilled	10-14	No	No	No	4.23411	Yes
20	19	68.2	158.8	60.7	Yes	Yes	27.0448	25-29.99 kg/m.sq	95	69	81.7333	102	0.801307	Yes	4.4	11.5	6	1.23	4.42138	0.76	No	No	Yes	No	4.87805	Low PAL	female	Drinks Alcohol 1-2 times/week	Yes	No	No	0.514693	6.4	25.4	No	86.3328	4.45821	No	No	Yes	6.15	Secondary	Skilled	0-9	No	Yes	No	2.44235	Yes
21	18	67.8	163	77.4	No	No	25.5185	25-29.99 kg/m.sq	108	56	76	106.067	0.716531	No	4.1	5.9	5	1.59	3.26321	0.32	No	No	No	No	3.14465	Low PAL	female	Drinks Alcohol 1-2 times/week	No	No	Yes	0.466258	5.1	3.3	No	69.4961	4.24127	No	No	No	1.75	Tertiary	Skilled	10-14	No	No	No	1.77495	No
22	20	80.7	167.3	42	Yes	Yes	28.8325	25-29.99 kg/m.sq	144	102	92.5	109.1	0.847846	No	4.4	7.3	3.9	1.26	2.42899	0.46	Yes	No	No	No	3.09524	Moderate PAL	female	Never Drank Alcohol	No	Yes	Yes	0.552899	5.2	12.5	No	131.45	4.87863	No	No			Primary/All Age	Semi/Unskilled	0-9	No	No	No	1.98787	No
23	19	88.9	159.8	60.6	Yes	Yes	34.8135	>=30 kg/m.sq	99	60	98.5	114.8	0.858014	No	4.6	6	4.1	1.04	2.86734	0.42	No	No	No	No	3.94231	Low PAL	female	Never Drank Alcohol	No	No		0.616395	10.3	2.5	No	87.0198	4.46614	No	No		6.5	Secondary	Highly Skilled	0-9	No	No	No	1.79176	No
24	18	68.2	167.8	71.5	No	Yes	24.2215	18.5-24.99 kg/m.sq	96	67	72.2333	99.3667	0.726937	No	4.7	8.9	4.2	1.08	2.78514	0.73	No	No	No	No	3.88889	Low PAL	female	Never Drank Alcohol	No	No	Yes	0.430473	3.3	12.1	No	77.4462	4.34958	No	No		0.3	Secondary		0-9	No	No	No	2.18605	No
25	18	111.3	170.5	33.3	Yes	Yes	38.2866	>=30 kg/m.sq	111	71	100.9	124.433	0.810876	Yes	4.4	11.9	5.8	1.07	4.38596	0.75	No	No	Yes	No	5.42056	High PAL	female	Rarely Drinks Alcohol	Yes	No	No	0.591789	4.2	28.2	No	168.964	5.12969	No	No	No	5.5	Secondary	Highly Skilled	10-14	No	Yes	No	2.47654	Yes
26	20	68.7	166	76.3	No	No	24.931	18.5-24.99 kg/m.sq	112	77	77.4667	100.167	0.773378	No	4.2	3.4	4.3	1.49	2.53018	0.61	No	Yes	No	No	2.88591	Low PAL	female	Rarely Drinks Alcohol	No	No	Yes	0.466667	11.5	2.5	No	71.7955	4.27382	No	No	Yes	1.4	Secondary	Skilled	0-9	No	No	No	1.22378	No
27	19	62.4	162.5	60.7	No	No	23.6308	18.5-24.99 kg/m.sq	107	74	74.9	97.8	0.765849	No	4.7	5.8	6.1	2.17	3.74651	0.4	No	No	Yes	No	2.81106	Low PAL	female	Drinks Alcohol 1-2 times/week	No	No	No	0.460923	4.8	22.3	No	88.3443	4.48124	No	No		0.3	Primary/All Age	Semi/Unskilled	0-9	No	No	No	1.75786	No
28	19	57.9	168.4	51.2	No	Yes	20.4171	18.5-24.99 kg/m.sq	86	56	68.8	93.5	0.735829	Yes	4.2		6.2	1.06	4.67211	1.02	No	Yes	Yes	No	5.84906	High PAL	female	Drinks Alcohol 3 or more times/week	Yes	No	No	0.408551	8.4	42.1	Yes	108.539	4.68711	Yes	Yes	Yes	0.85	Tertiary	Skilled	0-9	No	No	No		No
29	19	52	157.5	54.5	No	No	20.9625	18.5-24.99 kg/m.sq	110	70	65.6333	90.5667	0.724696	No	4.9	13.8	4.2	1.36	2.64275	0.43	No	No	No	No	3.08824	Moderate PAL	female	Drinks Alcohol 3 or more times/week	No	No	No	0.41672	6.6	10	No	95.367	4.55773	No	No	Yes	0.3	Tertiary	Skilled	10-14	No	No	No	2.62467	Yes
30	19	57.1	166.5	38.9	No	No	20.5972	18.5-24.99 kg/m.sq	129	71	70.9333	96.9	0.732026	No	4.1	2.5	5.4	1.55	3.50596	0.75	No	No	Yes	No	3.48387	Low PAL	female	Rarely Drinks Alcohol	Yes	Yes	No	0.426026	7.6	2.5	No	141.247	4.95051	No	No	No	2.05	Primary/All Age	Semi/Unskilled	0-9	No	No	No	0.916291	No
31	18	70.3	170.2	56.8	No	Yes	24.2681	18.5-24.99 kg/m.sq	103	72	71	99.4	0.714286	No	3.7	13.8	5.6	1.25	3.98761	0.79	No	No	Yes	No	4.48	Low PAL	female	Drinks Alcohol 1-2 times/week	Yes	No	No	0.417156	7.4	7.4	No	98.8838	4.59395	No	No	No	0.3	Secondary	Semi/Unskilled	10-14	No	No	No	2.62467	Yes
32	18	49.8	163.9	56.8	No	Yes	18.5384	18.5-24.99 kg/m.sq	108	66	67.8	83.5333	0.811652	No	4.8	5.7	4.7	1.2	3.29358	0.45	No	No	No	No	3.91667	High PAL	female	Drinks Alcohol 1-2 times/week	No	No	Yes	0.413667	6	11.9	No	95.2236	4.55623	No	No	No	0.55	Tertiary	Highly Skilled	10-14	No	No	No	1.74047	No
33	20	82.3	169.6	35.8	Yes	Yes	28.612	25-29.99 kg/m.sq	103	78	90.7	117.5	0.771915	No	5.1		4.7	1.1	2.93027	1.46	No	No	No	Yes	4.27273	Low PAL	female	Rarely Drinks Alcohol	Yes	No	No	0.534788				156.335	5.052		No	No	0.3	Primary/All Age	Skilled	0-9	Yes	Yes	Yes		No
34	19	50.8	157.9	29.4	No	No	20.3751	18.5-24.99 kg/m.sq	98	63	73.8	90.5	0.81547	No	4.3	2.1	4.2	1.36	2.5556	0.62	No	No	No	No	3.08824	Moderate PAL	female	Rarely Drinks Alcohol	No	No	Yes	0.467384	11.8	2.5	No	177.235	5.17747	No	No	No	2.2	Secondary	Semi/Unskilled	0-9	No	No	No	0.741937	No
35	19	71.5	154.4		Yes		29.9924	25-29.99 kg/m.sq	107	68	84.2667	103.467	0.814433		4.2	9.8	4			0.37	No	No	No	No		Moderate PAL	female	Drinks Alcohol 3 or more times/week	No	No	No	0.545769	7	9.3	No				No	No	2.95	Secondary	Skilled	10-14	No	No	No	2.28238	Yes
36	18	44.7	160.8	42.1	No	Yes	17.2876	<18.5 kg/m.sq.	124	76	64.5	85.6	0.753505	No	4.4	6.5	5.1	0.87	3.82633	0.88	No	No	No	No	5.86207	Moderate PAL	female	Drinks Alcohol 3 or more times/week	Yes	Yes	No	0.401119	6.5	2.8	No	126.043	4.83662	No	No	No	0.8	Secondary	Skilled	0-9	No	No	No	1.8718	No
37	18	47.6	156.6	42.1	No	No	19.4099	18.5-24.99 kg/m.sq	92	55	63.2	85.3333	0.740625	No	4.2	5.8	3.4	1.43	1.85073	0.26	No	No	No	No	2.37762	Moderate PAL	female	Rarely Drinks Alcohol	No	No		0.403576	6.6	4.4	No	122.751	4.81015	No	No	No		Tertiary	Skilled	15-17	No	No	No	1.75786	No
38	20	58.4	162	32.7	No	Yes	22.2527	18.5-24.99 kg/m.sq	111	65	74.7	95.8	0.779749	Yes	5		6.4	1.2	4.87431	0.71	No	Yes	Yes	Yes	5.33333	Moderate PAL	female	Drinks Alcohol 3 or more times/week	No	No	Yes	0.461111	5.6			163.486	5.09673		Yes	Yes			Skilled	10-14	No	No	No		No
39	19	51.5	156.6	73.1	No	No	21.0002	18.5-24.99 kg/m.sq	116	66	65.5667	92.5	0.708829	No	4.6		5.2	1.44	3.59028	0.37	No	No	No	No	3.61111	Moderate PAL	female	Drinks Alcohol 3 or more times/week	No	No		0.418689	4.2			70.6949	4.25837		No	No	1.8	Tertiary	Skilled	15-17	No	No	No		No
40	20	54.8	155.2	70	No	Yes	22.7508	18.5-24.99 kg/m.sq	98	72	70.8667	92.9	0.762827	No	4.9	3.3	4.5	1.27	3.00523	0.49	No	No	No	No	3.54331	Low PAL	female	Drinks Alcohol 1-2 times/week	No	No	No	0.456615	5.5	2.5	No	73.1657	4.29273	No	No	No	0.3	Secondary	Skilled	10-14	No	No	No	1.19392	No
41	19	43.6	151.7	70	No		18.9459	18.5-24.99 kg/m.sq	122	70	61	81.8	0.745721								No	No	Yes			High PAL	female	Rarely Drinks Alcohol		Yes		0.402109	10.1	5.4	No	71.5157	4.26992	No	No	No	0.35	Secondary	Highly Skilled	10-14	No	No	No		No
42	18	67.5	161.6	59.8	No	Yes	25.8476	25-29.99 kg/m.sq	99	52	73.2667	101.133	0.724456	No	4.7	6.6	4.4	1.01	3.22945	0.35	No	Yes	No	No	4.35644	Moderate PAL	female	Drinks Alcohol 3 or more times/week	No	No	Yes	0.453383	5.2	3.5	No	89.1773	4.49063	No	Yes	Yes	0.95	Secondary	Skilled	10-14	No	No	No	1.88707	No
43	20	51.9	167.2	66.9	No		18.565	18.5-24.99 kg/m.sq	110	68	65.3667	89.5	0.730354		4.7	2	3.3			0.27	No	No	No	No		Low PAL	female	Drinks Alcohol 1-2 times/week	No	No	Yes	0.390949		3.7	No	82.4753	4.4125	No	No	No	0.8		Skilled	0-9	No	No	No	0.693147	No
44	20	78	165.5	48.2	Yes	Yes	28.4773	25-29.99 kg/m.sq	95	68	84.3333	108.167	0.779661	No	3.1	23.2	4.1	0.93	2.9544	0.47	No	No	No	No	4.4086	Moderate PAL	female	Drinks Alcohol 3 or more times/week	No	No	No	0.509567	4.8	13.8	No	113.309	4.73012	No	No		2.65	Secondary	Skilled	0-9	No	No	No	3.14415	Yes
45	18	49.6	165.5		No		18.1086	<18.5 kg/m.sq.	88	54	63.9667	88.7	0.721157		4.3	4.9	3			0.35	No	No	No	No		Low PAL	female	Drinks Alcohol 1-2 times/week	No	No	No	0.386506	4.9	6.6	No				No	No	0.8	Secondary	Highly Skilled	10-14	No	No	No	1.58924	No
46	20	48.9	154	104.3	No	Yes	20.619	18.5-24.99 kg/m.sq	96	53	67.4	87.3	0.77205	No	4.5	7.9	3.4	1.19	2.08615	0.27	No	No	No	No	2.85714	Low PAL	female	Rarely Drinks Alcohol	No	No	No	0.437662	7	2.5	No	48.7248	3.88619	Yes	No	No	0.4	Primary/All Age	Skilled	0-9	No	No	No	2.06686	No
47	19	64.1	160.7	82.5	No	Yes	24.8214	18.5-24.99 kg/m.sq	110	64	72.6667	96.3	0.754586	No	4.3	10.8	4.6	1.15	3.17936	0.59	No	Yes	No	No	4	Low PAL	female	Drinks Alcohol 3 or more times/week	No	No	Yes	0.452188	7.6	2.5	No	64.28	4.16325	No	Yes	Yes	3.45		Skilled	10-14	No	No	No	2.37955	Yes
48	19	60.2	160.5		No	Yes	23.3693	18.5-24.99 kg/m.sq	109	63	77.0667	95.2667	0.808957	Yes	4.8	3.8	6.2	1.17	4.50706	1.14	No	No	Yes	No	5.29915	Low PAL	female	Drinks Alcohol 1-2 times/week	Yes	No	Yes	0.480166	10	14.3	No				No	No	1.4	Tertiary	Highly Skilled	15-17	No	No	No	1.335	No
49	20	51	158.5	70	No	Yes	20.3007	18.5-24.99 kg/m.sq	120	68	67.2333	86.8333	0.77428	No	4.5	5.3	4.4	0.92	3.3378	0.31	No	No	No	No	4.78261	Moderate PAL	female	Never Drank Alcohol	No	Yes		0.424185	6.3	2.5	No	74.7214	4.31377	No	No		0.3	Secondary	Skilled	10-14	No	No	No	1.66771	No
50	20	87.8	165.1	66.9	Yes	Yes	32.2107	>=30 kg/m.sq	110	61	93.4333	114.233	0.817917	No	4.8	9.3	2.7	1.18	1.36404	0.34	No	No	No	No	2.28814	Moderate PAL	female	Drinks Alcohol 1-2 times/week	No	No	No	0.56592	7.1	6.8	No	81.4395	4.39986	No	No	No	0.3	Tertiary	Skilled	10-14	No	No	No	2.23001	No
51	18	44.2	153.4	45.1	No	No	18.7833	18.5-24.99 kg/m.sq	115	60	66	81.7	0.807834	No	4.2	4.4	5.2	1.45	3.3555	0.86	No	No	No	No	3.58621	Low PAL	female	Drinks Alcohol 1-2 times/week	Yes	No	No	0.430248	12.3	1.8	No	112.244	4.72067	No	No	No	0.8	Secondary	Semi/Unskilled	10-14	No	No	No	1.4816	No
52	19	43.6	160.3	60.6	No	No	16.9676	<18.5 kg/m.sq.	94	51	63.8667	82.5	0.774141	No	4.1	2	4.2	1.38	2.64569	0.38	No	No	No	No	3.04348	High PAL	female	Rarely Drinks Alcohol	No	No	No	0.39842	3.4	20.8	No	87.2921	4.46926	No	No	Yes	0.3	Secondary	Skilled	10-14	No	No	No	0.693147	No
53	19	58.9	154.5	57.5	No	Yes	24.6751	18.5-24.99 kg/m.sq	101	72	79.4333	97.8	0.812202	No	5.1	11.1	3.4	1.07	2.03642	0.64	No	No	No	Yes	3.17757	Low PAL	female	Never Drank Alcohol	No	No	No	0.514132	6.7	2.7	No	88.6696	4.48492	No	Yes		2.9	Primary/All Age		10-14	No	No	No	2.40695	Yes
54	18	69.5	165.4	56.8	No	No	25.4047	25-29.99 kg/m.sq	102	70	78.1667	96.8	0.807507	No	3.9	6.5	4.5	2.24	2.16367	0.21	No	No	No	No	2.00893	Low PAL	female	Drinks Alcohol 1-2 times/week	No	No	Yes	0.472592	6	5.5	No	96.0951	4.56534	No	No	No	0.3	Tertiary	Skilled	10-14	No	No	No	1.8718	No
55	18	47.3	156.7	59.8	No	No	19.263	18.5-24.99 kg/m.sq	101	58	62.7667	89.8333	0.698701	No	5.1	12.3	3.5	1.53	1.60303	0.8	No	No	No	Yes	2.28758	Low PAL	female	Drinks Alcohol 1-2 times/week	Yes	No		0.400553	7.8	5.1	No	86.4732	4.45984	No	No	No	0.7	Tertiary	Highly Skilled	10-14	No	No	No	2.5096	Yes
56	18	79	165.8	48	No	Yes	28.7381	25-29.99 kg/m.sq	93	64	78.8	106.467	0.740138	No	4.5	7.7	4.1	1.1	2.80275	0.43	No	No	No	No	3.72727	Moderate PAL	female	Drinks Alcohol 1-2 times/week	No	No		0.475271	6.5	1.8	No	113.988	4.73609	No	No	Yes	2.85	Tertiary	Highly Skilled	10-14	No	No	No	2.04122	No
57	18	51.5	161.9	62.7	No	Yes	19.6478	18.5-24.99 kg/m.sq	97	55	63.2667	86.6	0.730562	No	4.2	7.9	3.4	1.26	1.9978	0.31	No	Yes	No	No	2.69841	Moderate PAL	female	Drinks Alcohol 3 or more times/week	No	No	Yes	0.390776	5.8	7	No	85.2105	4.44513	No	Yes	Yes	7.75	Primary/All Age	Semi/Unskilled	10-14	No	No	No	2.06686	No
58	20	71.3	154.2	70	Yes	No	29.9862	25-29.99 kg/m.sq	117	69	84.1	105.867	0.794395	No	4.4	11.5	5.5	1.36	3.92899	0.46	No	No	Yes	No	4.04412	Moderate PAL	female	Never Drank Alcohol	No	No	Yes	0.545396	4.8	2.5	No	72.6943	4.28626	No	No		2.35	Tertiary	Skilled	15-17	No	No	No	2.44235	Yes
59	19	55	169	76.2	No	No	19.257	18.5-24.99 kg/m.sq	109	77	66.2333	91.2667	0.725712	No	4.2	5.8	5.8	2.34	3.30404	0.34	No	No	Yes	No	2.47863	Low PAL	female	Drinks Alcohol 1-2 times/week	No	No	Yes	0.391913	5.9	2.5	No	73.189	4.29305	No	No	No	0.3	Tertiary	Highly Skilled	15-17	No	No	No	1.75786	No
60	19	50.9	166	70	No	No	18.4715	<18.5 kg/m.sq.	107	74	64.6333	88.5	0.73032	No	3.7	10.1	4.5	1.32	2.97358	0.45	No	No	No	No	3.40909	Low PAL	female	Rarely Drinks Alcohol	No	No	Yes	0.389357	5.1	34.7	Yes	78.2571	4.36	Yes	No	No	0.3	Primary/All Age	Skilled	10-14	No	No	No	2.31254	Yes
61	19	51.2	161	48.1	No	Yes	19.7523	18.5-24.99 kg/m.sq	99	50	64.6	90.2	0.716186	No	5.1	12.2	3.4	1.19	2.08615	0.27	No	No	No	Yes	2.85714	Low PAL	female	Rarely Drinks Alcohol	No	No		0.401242	3.5	46.2	Yes	110.457	4.70463	Yes	No	No	0.3	Secondary	Semi/Unskilled	10-14	No	No	No	2.50144	Yes
62	19	47.8	166.2	45	No	No	17.3048	<18.5 kg/m.sq.	109	74	60.8	85.4	0.711944	No	4.5	3.3	4.8	1.7	2.82477	0.6	No	No	No	No	2.82353	Low PAL	female	Rarely Drinks Alcohol	No	No	No	0.365824	4.4	2.5	No	121.88	4.80304	No	No	No	0.3	Tertiary	Skilled	10-14	No	No	No	1.19392	No
63	19	53.6	169.9	51.2	No	No	18.5686	18.5-24.99 kg/m.sq	95	67	63.9667	89.6333	0.713648	No	4.5		5.3	1.36	3.6556	0.62	No	No	Yes	No	3.89706	Moderate PAL	female	Drinks Alcohol 1-2 times/week	No	No	No	0.376496	3.5	41.1	Yes	109.506	4.69598	Yes	No	No	0.3	Secondary	Skilled	0-9	No	No	No		No
64	19	54.8	171.3	54.5	No	No	18.6752	18.5-24.99 kg/m.sq	107	61	64.8	90.7333	0.714181	No	4.3	10.6	5.3	1.51	3.59734	0.42	No	No	Yes	No	3.50993	High PAL	female	Rarely Drinks Alcohol	No	No	Yes	0.378284	6	3.2	No	103.723	4.64172	No	No	Yes		Tertiary	Skilled	10-14	No	No	No	2.36085	Yes
65	18	62.2	165.8		No		22.6267	18.5-24.99 kg/m.sq	101	66	67.9	97	0.7		3.9						No	No		No		Moderate PAL	female	Rarely Drinks Alcohol		No		0.40953		8.3	No				No	No		Secondary	Skilled	15-17	No	No	No		No
66	18	51.8	161.5	71.5	No	No	19.8602	18.5-24.99 kg/m.sq	97	60	65.5	88.0667	0.743755	No	4	3.8	4.7	1.5	2.96147	0.52	No	No	No	No	3.13333	Moderate PAL	female	Rarely Drinks Alcohol	No	No		0.405573	5.7	7.7	No	74.5385	4.31132	No	No	No	0.6	Tertiary	Highly Skilled	10-14	No	No	No	1.335	No
67	19	62.3	163.5	42	No	No	23.3052	18.5-24.99 kg/m.sq	106	79	73.8667	97.8333	0.755026	No	4.3	2.5	4.3	1.46	2.62899	0.46	No	No	No	No	2.94521	Moderate PAL	female	Rarely Drinks Alcohol	No	No		0.451784	3.4	8	No	128.464	4.85565	No	No	No	0.3	Secondary		15-17	No	No	No	0.916291	No
68	19	105.5	169.4	76.2	Yes	Yes	36.7642	>=30 kg/m.sq	105	62	109.3	121.233	0.901567	Yes	4.6	11.7	5.8	1.14	4.32514	0.73	No	No	Yes	No	5.08772	Low PAL	female	Drinks Alcohol 3 or more times/week	No	No	Yes	0.645218	5.3	3.4	No	73.3622	4.29541	No	No	No	3.8	Primary/All Age	Highly Skilled	10-14	No	No	No	2.45959	Yes
69	19	47.9	161.1	66.9	No		18.4563	<18.5 kg/m.sq.	109	74	62.6667	83	0.75502		4	7.9	4.2			0.4	No	No	No	No		High PAL	female	Drinks Alcohol 3 or more times/week	No	No	Yes	0.388992	8.2	2.5	No	79.4664	4.37533	No	Yes	Yes	0.3	Secondary	Skilled	10-14	No	No	No	2.06686	No
70	19	66.9	161.3	23.2	Yes	Yes	25.7133	25-29.99 kg/m.sq	102	60	86.5	101.8	0.849705	No	4.6		5.4	1.15	3.41972	1.81	No	No	Yes	No	4.69565	Moderate PAL	female	Rarely Drinks Alcohol	Yes	No	Yes	0.536268	8.1	6.6	No	229.435	5.43562	No	No	No		Primary/All Age	Skilled	0-9	No	Yes	No		No
71	19	81.4	162.1	51.2	Yes	Yes	30.9784	>=30 kg/m.sq	104	70	86.8333	111.933	0.775759	No	4.5	11.3	4.2	0.9	3.07064	0.5	No	No	No	No	4.66667	Moderate PAL	female	Drinks Alcohol 1-2 times/week	No	No	No	0.535678	5.2	6.4	No	104.479	4.64898	No	No	Yes	8.4	Secondary	Highly Skilled	10-14	No	No	No	2.4248	Yes
72	19	56.4	161.6	51.2	No		21.5971	18.5-24.99 kg/m.sq	118	67	67.9333	94.5333	0.718618								No	No	Yes			Low PAL	female	Rarely Drinks Alcohol		No	No	0.42038	5.6	13.8	No	104.156	4.64589	No	No	No		Secondary	Skilled	10-14	No	No	No		No
73	19	77.1	164	51.2	Yes	Yes	28.666	25-29.99 kg/m.sq	97	70	83.8667	108.6	0.772253	No	4.3		4.5	0.61	3.6744	0.47	No	No	No	No	7.37705	Low PAL	female	Rarely Drinks Alcohol	No	No	No	0.511382	4.7	39.6	Yes	105.703	4.66063	Yes	No	No	5	Primary/All Age	Skilled	0-9	No	No	No		No
74	19	60.6	159.4	54.5	No	Yes	23.8504	18.5-24.99 kg/m.sq	121	79	74.3	96.3	0.771547	No	4.4		4.2	1.26	2.61431	0.71	No	No	No	No	3.33333	High PAL	female	Never Drank Alcohol	No	Yes	Yes	0.466123	6.3	2.8	No	96.5174	4.56972	No	No		0.5	Secondary	Semi/Unskilled	0-9	No	No	No		No
75	18	58.5	167.9	77.4	No	No	20.7517	18.5-24.99 kg/m.sq	98	67	62.5	92.9667	0.672284	No	4.4	3.4	4.5	1.52	2.79193	0.41	No	No	No	No	2.96053	High PAL	female	Rarely Drinks Alcohol	No	No	Yes	0.372245	3.4	5.4	No	71.5853	4.27089	No	No	No	0.4	Secondary	Skilled	10-14	No	No	No	1.22378	No
76	18	55.9	171.9		No		18.9173	18.5-24.99 kg/m.sq	107	79	65.1	90.2	0.72173								No	No	No			High PAL	female	Drinks Alcohol 3 or more times/week		No	No	0.378709	5.3	2.2	No				No	No	0.3	Secondary	Highly Skilled	10-14	No	No	No		No
77	19	51.5	159.4		No	No	20.2689	18.5-24.99 kg/m.sq	106	64	68.2	90	0.757778	No	4.6	14.3	5.4	1.4	3.79817	0.44	No	No	Yes	No	3.85714	Moderate PAL	female	Drinks Alcohol 1-2 times/week	No	No	No	0.427854	3.2	2.5	No				No	No	0.3	Secondary	Semi/Unskilled	0-9	No	No	No	2.66026	Yes
78	19	53.6	157.5	79.3	No	Yes	21.6075	18.5-24.99 kg/m.sq	106	74	68.3667	89.9333	0.760193	No	4		4.9	1.15	3.41514	0.73	No	Yes	No	No	4.26087	Moderate PAL	female	Drinks Alcohol 3 or more times/week	No	No	Yes	0.434074	4.7	30.3	Yes	65.5422	4.18269	Yes	No	No	1.05	Tertiary	Skilled	10-14	No	No	No		No
79	18	48.4	162.9	50.9	No	No	18.2391	<18.5 kg/m.sq.	102	50	65.4	85.5	0.764912	No	4.6	6.2	4	1.37	2.47862	0.33	No	No	No	No	2.91971	Moderate PAL	female	Drinks Alcohol 3 or more times/week	No	No	Yes	0.401473	4.7	7.6	No	105.613	4.65978	No	Yes	Yes	0.35		Skilled	0-9	No	No	No	1.82455	No
80	18	74.1	170.9	42.1	No	Yes	25.3708	25-29.99 kg/m.sq	108	64	76	104.8	0.725191	No	4.5	7.1	3.4	1.05	2.14817	0.44	No	No	No	No	3.2381	High PAL	female	Never Drank Alcohol	No	No	Yes	0.444705	8.1	2.6	No	133.96	4.89754	No	No		2.05	Primary/All Age	Skilled	10-14	No	No	No	1.96009	No
81	18	68.4	169.1	53.9	No	Yes	23.9204	18.5-24.99 kg/m.sq	106	70	67.3333	105.333	0.639241	No	4	3.6	3.5	1.08	2.30073	0.26	No	No	No	No	3.24074	Low PAL	female	Rarely Drinks Alcohol	No	No	Yes	0.398186	5.8	1.1	No	103.531	4.63987	No	No	No		Secondary	Semi/Unskilled	10-14	No	No	No	1.28093	No
82	19	50.9	170.4	70	No	Yes	17.5299	<18.5 kg/m.sq.	112	82	65.8667	88.1	0.747635	No	4.4	12	3.5	1.11	2.08725	0.66	No	No	No	No	3.15315	Moderate PAL	female	Drinks Alcohol 1-2 times/week	No	Yes	No	0.386541	6.8	4	No	80.3314	4.38616	No	No	No		Primary/All Age	Highly Skilled	10-14	No	No	No	2.48491	Yes
83	18	76.7	170	51.2	No	Yes	26.5398	25-29.99 kg/m.sq	103	75	79.1	109.933	0.719527	Yes	4.5		6.8	1.15	5.37018	0.61	No	No	Yes	No	5.91304	Low PAL	female	Rarely Drinks Alcohol	No	No	Yes	0.465294	7.6	2.2	No	109.57	4.69657	No	No	No	5.85	Secondary	Skilled	10-14	No	No	No		No
84	19	57.6	158.3	41.9	No	Yes	22.9859	18.5-24.99 kg/m.sq	100	61	72	99.4667	0.723861	No	4.6	8.9	4	1.11	2.77991	0.24	No	No	No	No	3.6036	High PAL	female	Never Drank Alcohol	No	No	Yes	0.454833	10.9	2.5	No	124.675	4.82571	No	No		2.6	Secondary	Semi/Unskilled	0-9	No	No	No	2.18605	No
85	19	64.6	155.4	26.3	Yes	Yes	26.7504	25-29.99 kg/m.sq	115	73	82.5333	102.133	0.808094	Yes	4.9	4.3	5.9	0.93	4.56174	0.89	No	Yes	Yes	No	6.34409	Moderate PAL	female	Drinks Alcohol 3 or more times/week	Yes	No	No	0.531103	3.1	21	No	194.989	5.27294	No	No	Yes	2	Secondary	Skilled	10-14	No	Yes	No	1.45862	No
86	19	83.5	159.7	26.5	Yes		32.7398	>=30 kg/m.sq	119	59	91.9667	109.333	0.841159		4.9	10.5	3.8			0.92	No	Yes	No	No		Moderate PAL	female	Drinks Alcohol 3 or more times/week	Yes	No		0.575871		2.5	No	198.872	5.29266	No	Yes	Yes		Secondary	Skilled	10-14	No	Yes	No	2.35138	Yes
87	20	69.1	163.2	63.8	No	Yes	25.944	25-29.99 kg/m.sq	105	66	77.3	100.4	0.76992	No	5.6	10.3	4.2	0.99	2.87972	0.72	No	No	No	Yes	4.24242	Low PAL	female	Drinks Alcohol 1-2 times/week	No	No		0.473652	5.9	2.5	No	84.4138	4.43573	No	No	No	3.25	Secondary	Skilled	10-14	No	No	No	2.33214	Yes
88	18	70	160.9	74.5	Yes	Yes	27.0387	25-29.99 kg/m.sq	98	70	85.2	98.6	0.864097	No	4.8	12	4.5	1.13	3.21862	0.33	No	No	No	No	3.9823	Moderate PAL	female	Drinks Alcohol 1-2 times/week	No	No	Yes	0.529521	7.1	2.8	No	71.2711	4.26649	No	No	No	0.75	Tertiary	Skilled	0-9	No	No	No	2.48491	Yes
89	20	46.9	161.3	70	No	No	18.0262	<18.5 kg/m.sq.	102	65	65.3333	86.8333	0.752399	No	4.5	4.1	4.9	1.43	3.25899	0.46	No	No	No	No	3.42657	Low PAL	female	Never Drank Alcohol	No	No		0.405042	4.4			76.0414	4.33128		No		1.4	Secondary	Highly Skilled	0-9	No	No	No	1.41099	No
90	18	66.4	159.6	42.1	No	No	26.0677	25-29.99 kg/m.sq	99	67	72.4	101.4	0.714004	No	3.7	8.6	4.8	1.42	2.97174	0.89	No	No	No	No	3.38028	Low PAL	female	Drinks Alcohol 3 or more times/week	Yes	No	Yes	0.453634	6	7.1	No	125.102	4.82913	No	No	Yes	1.25		Skilled	0-9	No	No	No	2.15176	No
91	18	76.6	163	36.2	Yes	No	28.8306	25-29.99 kg/m.sq	90	56	87.4667	106.633	0.820256	No	5.2	12.5	4.2	1.4	2.38257	0.91	No	No	No	Yes	3	Moderate PAL	female	Rarely Drinks Alcohol	Yes	No	No	0.536605	7.6	4	No	148.591	5.0012	No	No	No	2.2	Secondary	Semi/Unskilled	0-9	Yes	Yes	Yes	2.52573	Yes
92	19	55.1	158.4	32.5	No	Yes	21.9605	18.5-24.99 kg/m.sq	106	67	74.2	96.8667	0.766001	No	4.3	3.8	3.7	1.28	2.2778	0.31	No	No	No	No	2.89062	Moderate PAL	female	Never Drank Alcohol	No	No	No	0.468434	7.2	2.6	No	160.837	5.08039	No	No		0.3	Secondary	Skilled	0-9	No	No	No	1.335	No
93	18	46.3	163.9	36.2	No	Yes	17.2355	<18.5 kg/m.sq.	103	55	61.8333	84	0.736111	No		15.5	4.2	1.13	2.67092	0.87	No	No	No		3.71681	Low PAL	female	Drinks Alcohol 1-2 times/week	Yes	No	No	0.377263	4.1	16.8	No	149.412	5.0067	No	No	No	0.3		Skilled	0-9	No	No	No	2.74084	Yes
94	18	50.4	155.6	48	No	No	20.8167	18.5-24.99 kg/m.sq	96	75	65.1333	88.1	0.739311	No	3.8	2.4	5.6	1.47	3.89605	0.51	No	No	Yes	No	3.80952	Moderate PAL	female	Rarely Drinks Alcohol	No	No	Yes	0.418595	3.9	16.8	No	106.975	4.6726	No	No	No	1.05	Primary/All Age	Skilled	10-14	No	No	No	0.875469	No
95	18	116.5	170.5	68.6	Yes	No	40.0753	>=30 kg/m.sq	118	64	111.667	30.8	3.62554	No	4.3	20.5	4.6	1.74	2.61688	0.53	No	No	No	No	2.64368	Low PAL	female	Drinks Alcohol 3 or more times/week	No	No	Yes	0.654936	7	1.2	No	82.019	4.40695	No	No	Yes		Secondary	Skilled	10-14	No	No	No	3.02042	Yes
96	18	52.6	155.9	33.3	No	Yes	21.6418	18.5-24.99 kg/m.sq	105	54	66.2	88	0.752273	Yes	4.9	4.6	5.7	0.93	4.44431	0.71	No	No	Yes	No	6.12903	Low PAL	female	Drinks Alcohol 1-2 times/week	No	No	No	0.424631	5.1	21.1	No	154.495	5.04016	No	Yes	No	0.7		Semi/Unskilled	0-9	No	No	No	1.52606	No
97	18	59.3	160.1	68.6	No	Yes	23.1351	18.5-24.99 kg/m.sq	107	60	69.7	92.3	0.755146	No	4.9	16.3	3.7	1.16	2.23725	0.66	No	No	No	No	3.18966	Moderate PAL	female	Drinks Alcohol 3 or more times/week	No	No		0.435353	6.9	10.4	No	77.016	4.34401	No	No	No	3	Tertiary	Highly Skilled	10-14	No	No	No	2.79117	Yes
98	19	57.3	168.8	73.1	No	Yes	20.1099	18.5-24.99 kg/m.sq	116	69	69	93	0.741935	No	4.7	15.7	4.5	0.81	3.34596	0.75	No	No	No	No	5.55556	Low PAL	female	Drinks Alcohol 1-2 times/week	Yes	No	No	0.408768	6.2	32.5	Yes	76.2025	4.33339	Yes	No	No	0.3	Secondary		0-9	No	No	No	2.75366	Yes
99	19	50.1	167.8	76.2	No	Yes	17.7932	<18.5 kg/m.sq.	116	69	61.5667	84.5	0.7286	No	4.5	5.2	4.8	1.19	3.47239	0.3	No	No	No	No	4.03361	Moderate PAL	female	Rarely Drinks Alcohol	No	No	Yes	0.366905	5.1	2.7	No	72.6693	4.28592	No	No	No	0.3	Secondary	Semi/Unskilled	0-9	No	No	No	1.64866	No
100	19	57.5	174	48.2	No	Yes	18.9919	18.5-24.99 kg/m.sq	106	60	65.1333	92	0.707971	No	3.9	13.9	3.2	0.89	1.9889	0.7	No	No	No	No	3.59551	Low PAL	female	Never Drank Alcohol	No	No	No	0.374329	4.1	2.5	No	119.129	4.7802	No	No		3.1	Tertiary	Skilled	10-14	No	No	No	2.63189	Yes
101	19	52.2	166.1	70	No	Yes	18.9204	18.5-24.99 kg/m.sq	108	58	64.7667	90.5	0.715654	No	4.6	2.5	4.8	1.25	3.20596	0.75	No	No	No	No	3.84	High PAL	female	Rarely Drinks Alcohol	Yes	No	Yes	0.389926	4.6	2.5	No	78.3043	4.3606	No	No	No	1	Secondary	Skilled	0-9	No	No	No	0.916291	No
102	19	47.6	164.6	48.2	No	No	17.569	<18.5 kg/m.sq.	116	80	65.8	86.4	0.761574	No	4.1	11.6	4.4	1.6	2.40092	0.87	No	No	No	No	2.75	Moderate PAL	female	Drinks Alcohol 1-2 times/week	Yes	Yes	No	0.399757	8	9.7	No	112.693	4.72467	No	No	No	3.9	Secondary	Skilled	0-9	No	No	No	2.45101	Yes
103	19	68.4	164	48.2	No	No	25.4313	25-29.99 kg/m.sq	117	76	79.5667	102.533	0.776008	No	5.1	5.3	5.6	1.47	3.68963	0.96	No	Yes	Yes	Yes	3.80952	Moderate PAL	female	Drinks Alcohol 3 or more times/week	Yes	No	No	0.485163	9	2.5	No	112.282	4.72101	No	No	Yes	1.95	Secondary	Skilled	10-14	No	No	No	1.66771	No
104	20	44.7	160.9	54.5	No	Yes	17.2661	<18.5 kg/m.sq.	94	64	60.0667	84.4667	0.711129	No	4.4	2	4.2	0.98	3.02734	0.42	No	No	No	No	4.28571	Low PAL	female	Rarely Drinks Alcohol	No	No	No	0.373317	4.5	2.5	No	97.4257	4.57909	No	No	No	0.4	Tertiary	Skilled	10-14	No	No	No	0.693147	No
105	20	48.9	171.5	54.5	No	No	16.6257	<18.5 kg/m.sq.	111	80	63.7333	84.4667	0.754538	No	4.4	3.8	3.7	1.54	2.06826	0.2	No	No	No	No	2.4026	Low PAL	female	Never Drank Alcohol	No	Yes	Yes	0.371623	6	2.5	No	103.844	4.64289	No	No		0.5	Primary/All Age	Skilled	10-14	No	No	No	1.335	No
106	18	54.5	153.8	59.8	No	Yes	23.0401	18.5-24.99 kg/m.sq	95	65	73.7	88.1	0.836549	No	4.5	7.1	4.8	1.15	3.34266	0.67	No	No	No	No	4.17391	High PAL	female	Rarely Drinks Alcohol	No	No	Yes	0.479194	7.4	43.1	Yes	84.8729	4.44115	Yes	No	No	3.75	Tertiary	Skilled	10-14	No	No	No	1.96009	No
107	19	66.2	161.1	54.5	No		25.5074	25-29.99 kg/m.sq	104	65	79.7667	98	0.813946		5.5		4.8			0.53	No	No	No	Yes		High PAL	female	Rarely Drinks Alcohol	No	No		0.495138	4.4	30.8	Yes	97.5468	4.58033	Yes	No	No	0.5	Secondary	Skilled	15-17	No	No	No		No
108	20	53.5	169.5	73.1	No	No	18.6215	18.5-24.99 kg/m.sq	102	62	62.9333	87.8333	0.716509	No	4.5	2	4.7	1.32	3.21027	0.37	No	No	No	No	3.56061	Low PAL	female	Rarely Drinks Alcohol	No	No		0.371288	7	2.5	No	76.5185	4.33753	No	No	No	0.6	Tertiary	Skilled	0-9	No	No	No	0.693147	No
109	18	54.4	162.5	71.5	No	No	20.6012	18.5-24.99 kg/m.sq	97	59	66.9	88.3333	0.757358	No	4	7.8	4	1.36	2.44734	0.42	No	No	No	No	2.94118	High PAL	female	Never Drank Alcohol	No	No		0.411692	6	13.2	No	75	4.31749	No	No		1.3	Tertiary	Highly Skilled	10-14	No	No	No	2.05412	No
110	18	45.8	159.5	27.4	No	Yes	18.003	<18.5 kg/m.sq.	110	44	66.9	85.2	0.785211	No	4.2	11.9	4.3	1.16	2.54367	1.3	No	No	No	No	3.7069	Low PAL	female	Rarely Drinks Alcohol	Yes	No		0.419436	5.5	7.8	No	192.099	5.25801	No	No	No	2.8		Semi/Unskilled	10-14	No	No	No	2.47654	Yes
111	19	76.9	153.7	54.4	Yes	Yes	32.5521	>=30 kg/m.sq	107	67	82.1333	110.3	0.744636	No	4.4	10.3	3.8	1.19	2.45862	0.33	No	No	No	No	3.19328	High PAL	female	Drinks Alcohol 1-2 times/week	No	No	Yes	0.534374	5.8	6.6	No	93.2371	4.53515	No	No	No	7.45	Primary/All Age	Skilled	15-17	No	No	No	2.33214	Yes
112	19	88	170.2	73.1	Yes	No	30.3783	>=30 kg/m.sq	114	68	88.8	115.467	0.769053	No	4.5	8	5.8	2.5	3.12569	0.38	No	No	Yes	No	2.32	High PAL	female	Rarely Drinks Alcohol	No	No		0.521739	5.9	8.6	No	76.8345	4.34165	No	No	No	4.05	Primary/All Age		10-14	No	No	No	2.07944	No
113	18	50.6	150.5	48	No	No	22.3397	18.5-24.99 kg/m.sq	114	66	69.8	88.7	0.786922	No	4.1	8.3	4.3	1.44	2.76826	0.2	No	No	No	No	2.98611	Moderate PAL	female	Rarely Drinks Alcohol	No	No	Yes	0.463787	8.4	2.5	No	103.469	4.63927	No	No	No	0.3	Secondary	Highly Skilled	15-17	No	No	No	2.11626	No
114	18	45.1	156.3	50.9	No	Yes	18.4611	<18.5 kg/m.sq.	113	61	60	81.8	0.733496	No	4.5	10.1	3.6	1.11	2.21477	0.6	No	No	No	No	3.24324	Moderate PAL	female	Never Drank Alcohol	No	No	Yes	0.383877	4.8	43.9	Yes	101.334	4.61842	Yes	No		0.3	Tertiary	Highly Skilled	10-14	No	No	No	2.31254	Yes
115	19	51	164.1	41.9	No	Yes	18.9388	18.5-24.99 kg/m.sq	108	49	65.2667	89.9667	0.725454	No	4.2	7.8	5.5	1.26	3.97853	0.57	No	No	Yes	No	4.36508	Moderate PAL	female	Rarely Drinks Alcohol	No	No	Yes	0.397725	8.1	2	No	129.243	4.8617	No	No	No	1	Tertiary	Skilled	10-14	No	No	No	2.05412	No
116	18	57	175	68.6	No	Yes	18.6122	18.5-24.99 kg/m.sq	98	64	70.7	89.6	0.789062	No	4.1	3.7	4.2	1.13	2.84523	0.49	No	No	No	No	3.71681	Low PAL	female	Rarely Drinks Alcohol	No	No	No	0.404	5	4.1	No	84.1837	4.433	No	No	No	0.95	Tertiary	Skilled	10-14	No	No	No	1.30833	No
117	19	55.7	168.1	63.7	No	Yes	19.7115	18.5-24.99 kg/m.sq	119	87	69.9333	87.9667	0.794998	No	4.5	5.5	3.9	1.13	2.64156	0.28	No	No	No	No	3.45133	Moderate PAL	female	Drinks Alcohol 3 or more times/week	No	Yes	Yes	0.416022	10.4	2.5	No	87.0848	4.46688	No	No	No	0.4	Primary/All Age	Skilled	0-9	No	No	No	1.70475	No
118	18	64.9	164.2	65.6	No	No	24.0712	18.5-24.99 kg/m.sq	126	76	73.3333	100.733	0.727995	No	4.5	10.1	5.2	2.13	2.94156	0.28	No	No	No	No	2.44131	High PAL	female	Never Drank Alcohol	No	Yes	No	0.44661	6.6	417.7	Yes	82.6006	4.41402	Yes	Yes		0.6	Secondary	Semi/Unskilled	0-9	No	No	No	2.31254	Yes
119	19	77	164.4	48.2	No	No	28.4897	25-29.99 kg/m.sq	125	74	78.4333	107.733	0.728032	No	4.2	7.4	5.7	1.41	3.98266	0.67	No	No	Yes	No	4.04255	Moderate PAL	female	Rarely Drinks Alcohol	No	Yes	Yes	0.477088	6.3	2.7	No	112.556	4.72345	No	No	No	2.1	Tertiary	Highly Skilled	15-17	No	No	No	2.00148	No
120	19	54.2	153.3	38.9	No	No	23.063	18.5-24.99 kg/m.sq	119	76	66.9	99.5	0.672362	No	4.4	5.2	5.6	1.36	4.00147	0.52	No	No	Yes	No	4.11765	High PAL	female	Rarely Drinks Alcohol	No	No	No	0.436399	8	4.4	No	130.049	4.86791	No	No	Yes	0.35	Tertiary	Highly Skilled	0-9	No	No	No	1.64866	No
121	19	53.7	160.6	29.4	No	No	20.8201	18.5-24.99 kg/m.sq	109	46	64.7	91	0.710989	No	4.3	7.5	3.3	1.33	1.55716	0.9	No	No	No	No	2.4812	Low PAL	female	Rarely Drinks Alcohol	Yes	No	No	0.402864	6.4	13.2	No	180.265	5.19443	No	No	No		Secondary	Skilled	0-9	No	No	No	2.0149	No
122	19	52.6	160	48.2	No	Yes	20.5469	18.5-24.99 kg/m.sq	111	59	69.0667	93.8	0.736318	No	4.6	7.8	4.6	0.98	3.15211	1.02	No	No	No	No	4.69388	Moderate PAL	female	Drinks Alcohol 1-2 times/week	Yes	No	No	0.431667	6.7	9.9	No	109.544	4.69632	No	No	No	0.3	Secondary		10-14	No	No	No	2.05412	No
123	19	84.4	162	79.3	Yes	Yes	32.1597	>=30 kg/m.sq	106	74	87	114	0.763158	No	4	14.8	4.4	1.17	3.1245	0.23	No	No	No	No	3.76068	Moderate PAL	female	Drinks Alcohol 3 or more times/week	No	No	Yes	0.537037	5.3	2.5	No	67.4149	4.21087	No	No	No	4.55	Secondary	Semi/Unskilled	0-9	No	No	No	2.69463	Yes
124	19	90.8	177	23.2	Yes	Yes	28.9827	25-29.99 kg/m.sq	116	77	87.0667	117.267	0.742467	No	5.4	15	4.1	1.09	2.74394	0.58	No	No	No	Yes	3.76147	High PAL	female	Drinks Alcohol 3 or more times/week	No	No	Yes	0.491902	8.5	2	No	251.767	5.5285	No	No	Yes	3.75	Secondary	Skilled	10-14	Yes	No	No	2.70805	Yes
125	19	51.4	167.1	57.5	No	Yes	18.4082	<18.5 kg/m.sq.	109	62	63.3	89.4	0.708054	No	4.2	2	4.2	1	3.01193	0.41	No	No	No	No	4.2	Moderate PAL	female	Drinks Alcohol 1-2 times/week	No	No	No	0.378815	5.7	2.5	No	95.9009	4.56331	No	No	Yes	0.5	Tertiary	Highly Skilled	10-14	No	No	No	0.693147	No
126	18	58.4	157.8	53.9	No	Yes	23.453	18.5-24.99 kg/m.sq	113	47	77.0333	96.5667	0.797722	No	4.3		4.6	1.04	3.26183	0.65	No	No	No	No	4.42308	Moderate PAL	female	Drinks Alcohol 1-2 times/week	No	No	No	0.488171	4.2	1.4	No	96.6122	4.57071	No	No	No	0.45	Secondary	Highly Skilled	10-14	No	No	No		No
127	19	42.1	155.3	63.8	No	No	17.4558	<18.5 kg/m.sq.	102	87	55.5667	83.5667	0.664938	No	4.9	6.9	6	1.65	4.0656	0.62	No	No	Yes	No	3.63636	Moderate PAL	female	Rarely Drinks Alcohol	No	Yes		0.357802	7.3	2.5	No	80.3276	4.38611	No	No	No	1.3	Secondary	Skilled	10-14	No	No	No	1.93152	No
128	19	80.4	169.1	73.1	Yes	Yes	28.117	25-29.99 kg/m.sq	106	43	83.5	108.067	0.772671	No	4.7	11.9	4.8	0.91	3.6744	0.47	No	No	No	No	5.27473	Low PAL	female	Rarely Drinks Alcohol	No	No	Yes	0.493791	7.8	6.7	No	76.3379	4.33517	No	No	No		Secondary	Skilled	10-14	No	No	No	2.47654	Yes
129	18	54.2	162.1	60.7	No	No	20.6269	18.5-24.99 kg/m.sq	91	49	72.3	91.5	0.790164	No	4.6	2	3.7	1.45	2.04817	0.44	No	No	No	No	2.55172	Moderate PAL	female	Rarely Drinks Alcohol	No	No	No	0.446021	6.7	2.5	No	88.1269	4.47878	No	No	No	0.3		Skilled	0-9	No	No	No	0.693147	No
130	18	104.2	164.3	48	Yes	Yes	38.6005	>=30 kg/m.sq	104	58	99.5667	114.067	0.872881	No	4.3	15.5	3.8	0.8	2.8578	0.31	No	No	No	No	4.75	Moderate PAL	female	Drinks Alcohol 3 or more times/week	No	No	Yes	0.606005	8.6	1.8	No	112.956	4.727	No	No	No	6.95	Secondary		10-14	No	No	No	2.74084	Yes
131	19	66.1	162	73.1	Yes	Yes	25.1867	25-29.99 kg/m.sq	110	60	82	97	0.845361	No	3.5	4.7	3.6	0.97	2.54743	0.18	No	No	No	No	3.71134	High PAL	female	Rarely Drinks Alcohol	No	No	Yes	0.506173	6.5	3.3	No	73.1327	4.29228	No	No	No	0.8	Secondary	Skilled	0-9	No	No	No	1.54756	No
132	18	53	161.9	56.8	No	No	20.22	18.5-24.99 kg/m.sq	115	64	66.5	87.2333	0.762323	No	4.2	8.8	4.4	1.37	2.78229	0.54	No	No	No	No	3.21168	High PAL	female	Drinks Alcohol 3 or more times/week	No	No	No	0.410747	5	5.3	No	94.0616	4.54395	No	No	Yes	0.5	Secondary	Highly Skilled	0-9	No	No	No	2.17475	No
133	18	92.8	167.3	48	Yes	Yes	33.1555	>=30 kg/m.sq	104	48	90.5333	116.433	0.777555	No	4.8	16.9	4.1	1.19	2.70358	0.45	No	No	No	No	3.44538	Moderate PAL	female	Drinks Alcohol 3 or more times/week	No	No	Yes	0.541144	6.3	1.1	No	115.019	4.7451	No	No	No	1	Tertiary	Semi/Unskilled	0-9	No	No	No	2.82731	Yes
134	18	81.7	162.3	56.8	Yes	Yes	31.0159	>=30 kg/m.sq	120	68	88.4	105.6	0.837121	No	4.6	18.1	4.5	0.84	3.49028	0.37	No	No	No	No	5.35714	Moderate PAL	female	Rarely Drinks Alcohol	No	Yes	No	0.54467	7	1.1	No	94.294	4.54642	No	No	No	4.75	Secondary	Skilled	10-14	No	No	No	2.89591	Yes
135	18	67.7	161	53.9	Yes	Yes	26.1178	25-29.99 kg/m.sq	104	54	81.6	98.5333	0.828146	No	4.8	13.2	3	0.57	2.02633	0.88	No	No	No	No	5.26316	Moderate PAL	female	Rarely Drinks Alcohol	Yes	No	Yes	0.506832	5	1.7	No	98.5714	4.59078	No	No	No	6.05	Secondary	Skilled	10-14	No	Yes	No	2.58022	Yes
136	19	101.8	163	63.8	Yes	Yes	38.3153	>=30 kg/m.sq	126	70	103.833	120.267	0.863359	No	4.6	14.7	3.8	0.89	2.57055	0.74	No	No	No	No	4.26966	Low PAL	female	Rarely Drinks Alcohol	No	Yes	Yes	0.637014	6.2	2.5	No	84.3103	4.4345	No	No	No	3.4		Semi/Unskilled	0-9	No	No	No	2.68785	Yes
137	19	55.3	154.7	38.9	No	No	23.107	18.5-24.99 kg/m.sq	103	61	69.9333	95.6	0.73152	No	4.6	2	4.9	1.49	3.28156	0.28	No	No	No	No	3.28859	Moderate PAL	female	Drinks Alcohol 3 or more times/week	No	No		0.452058	5.4	2.5	No	131.236	4.877	No	No	No	0.3	Secondary		0-9	No	No	No	0.693147	No
138	18	125.6	164	77.4	Yes	Yes	46.6984	>=30 kg/m.sq	113	66	123.8	139.9	0.884918	No	4.5	19.3	4.4	1.01	3.00468	0.84	No	No	No	No	4.35644	Low PAL	female	Rarely Drinks Alcohol	Yes	No		0.754878	4.2	16.2	No	69.9225	4.24739	No	No	No	6.1	Primary/All Age	Semi/Unskilled	10-14	No	Yes	No	2.9601	Yes
139	19	50.1	159.4	45	No	No	19.7179	18.5-24.99 kg/m.sq	118	57	66.9333	88.5667	0.75574	No	4.4	11.3	3.6	1.44	1.97651	0.4	No	No	No	No	2.5	Moderate PAL	female	Rarely Drinks Alcohol	No	No	No	0.419908	6.1	5.3	No	116.893	4.76126	No	No	No	0.7	Secondary	Skilled	10-14	No	No	No	2.4248	Yes
141	20	61.5	159.6	57.6	No	Yes	24.144	18.5-24.99 kg/m.sq	101	57	73.9	100.8	0.733135	No	4.6	2.4	4.5	1.1	3.21193	0.41	No	No	No	No	4.09091	Moderate PAL	female	Rarely Drinks Alcohol	No	No	No	0.463033	9.9	2.5	No	91.4375	4.51566	No	No	No	5.7	Secondary	Semi/Unskilled	10-14	No	No	No	0.875469	No
142	18	82.9	168.2	50.9	Yes	Yes	29.3024	25-29.99 kg/m.sq	105	73	83.7	107.767	0.776678	No	4	4.9	3.6	0.89	2.56321	0.32	No	No	No	No	4.04494	Low PAL	female	Rarely Drinks Alcohol	No	No	No	0.497622	5.8			109.049	4.6918		No	No	2.15	Tertiary	Highly Skilled	10-14	No	No	No	1.58924	No
143	19	90.7	166.7	42	Yes	No	32.6389	>=30 kg/m.sq	123	78	96.0667	115.233	0.833671	No	4	12.8	3.2	1.37	1.73367	0.21	No	No	No	No	2.33577	Low PAL	female	Rarely Drinks Alcohol	No	Yes		0.576285	4.2	6	No	130.979	4.87503	No	Yes	No	0.3	Secondary	Semi/Unskilled	10-14	No	No	No	2.54945	Yes
144	19	58.9	172.9	60.6	No	Yes	19.7027	18.5-24.99 kg/m.sq	98	65	72.6	95.5	0.760209	No	4.1	3.6	4.4	1.04	3.15358	0.45	No	No	No	No	4.23077	Moderate PAL	female	Drinks Alcohol 1-2 times/week	No	No	Yes	0.419896	4.2	71	Yes	94.1535	4.54493	Yes	No	No	1.4	Secondary		15-17	No	No	No	1.28093	No
145	18	58.1	163.4	45.1	No	No	21.7607	18.5-24.99 kg/m.sq	105	70	70.7	94.6	0.747357	No	5	5.6	4.1	1.74	2.17651	0.4	No	No	No	Yes	2.35632	Low PAL	female	Drinks Alcohol 1-2 times/week	No	No	No	0.432681	4.7	8.2	No	119.561	4.78383	No	No	Yes	1.3	Secondary		10-14	No	No	No	1.72277	No
146	19	62.5	168.8	66.9	No	Yes	21.9349	18.5-24.99 kg/m.sq	97	58	68.6667	98.7	0.695711	No	4.6	10	3.7	1.16	2.31523	0.49	No	No	No	No	3.18966	Moderate PAL	female	Drinks Alcohol 1-2 times/week	No	No		0.406793	4.4	9.1	No	83.2646	4.42202	No	No	No	0.5	Tertiary		10-14	No	No	No	2.30259	Yes
147	19	70.9	163.9	71.5	Yes	Yes	26.393	25-29.99 kg/m.sq	114	74	80.5333	96.7	0.832816	No	3.8		3.5	0.95	2.36651	0.4	No	No	No	No	3.68421	Moderate PAL	female	Drinks Alcohol 1-2 times/week	No	No	Yes	0.491357	5.2	2.2	No	75.6461	4.32607	No	No	Yes	1.5	Tertiary	Skilled	15-17	No	No	No		No
148	18	66.2	167.4	56.8	No	Yes	23.6237	18.5-24.99 kg/m.sq	133	71	69.9	101	0.692079	No	4.3		4.6	0.99	3.48156	0.28	No	No	No	No	4.64646	High PAL	female	Rarely Drinks Alcohol	No	Yes	Yes	0.417563	6.4	2.5	No	97.257	4.57736	No	No	No	1.15		Skilled	10-14	No	No	No		No
149	19	61.5	164.4	48.2	No	No	22.7547	18.5-24.99 kg/m.sq	96	66	72.9333	96.3667	0.756832	No	3.9	4.2	5.5	1.53	3.74982	0.48	No	No	Yes	No	3.59477	Moderate PAL	female	Rarely Drinks Alcohol	No	No	No	0.443633	7	9	No	112.556	4.72345	No	No	No	0.3	Secondary	Skilled	10-14	No	No	No	1.43508	No
150	18	46.2	166.6	74.5	No	No	16.6453	<18.5 kg/m.sq.	110	68	61.3	86	0.712791	No	4.7	6.3	4.1	1.8	2.09358	0.45	No	No	No	No	2.27778	Low PAL	female	Never Drank Alcohol	No	No	Yes	0.367947	4.7	5	No	73.796	4.3013	No	No			Tertiary	Highly Skilled	15-17	No	No	No	1.84055	No
151	19	42.7	156.7	39.2	No	Yes	17.3896	<18.5 kg/m.sq.	109	72	59.1333	82.5333	0.716478	No	3.8		3.9	1.15	2.48395	0.58	No	No	No	No	3.3913	Low PAL	female		No	No	No	0.377367	3.8	7.6	No	131.916	4.88216	No	No	No	1.25	Secondary	Highly Skilled	10-14	No	No	No		No
152	18	55.6	161.7	62.7	No	Yes	21.2645	18.5-24.99 kg/m.sq	98	52	68.4	89.3	0.765957	No	4.3	10.1	4.1	0.93	2.67917	1.07	No	No	No	No	4.4086	Moderate PAL	female	Drinks Alcohol 3 or more times/week	Yes	No		0.423006	6.7	5.6	No	85.1053	4.44389	No	No	No	0.85	Secondary	Skilled	0-9	No	No	No	2.31254	Yes
153	19	54.7	162.8	41.9	No	Yes	20.6385	18.5-24.99 kg/m.sq	110	54	72.3333	89.4	0.809098	No	4.7	6.9	4.9	0.88	3.63009	0.85	No	No	No	No	5.56818	Moderate PAL	female	Rarely Drinks Alcohol	Yes	No	No	0.444308	5.3	2.3	No	128.22	4.85374	No	No	No	7		Skilled	10-14	No	No	No	1.93152	No
154	19	41.6	155.6	45	No	No	17.182	<18.5 kg/m.sq.	114	59	59.0667	81.0667	0.728618	No	3.6	2	4.4	1.31	2.81477	0.6	No	No	No	No	3.35878	Moderate PAL	female	Drinks Alcohol 3 or more times/week	No	No	No	0.379606	10.6	2.5	No	114.107	4.73713	No	No	No	3.05		Semi/Unskilled	0-9	No	No	No	0.693147	No
155	20	77.8	171.7		No	No	26.39	25-29.99 kg/m.sq	102	66	77.2	110.333	0.699698	No	3.9	6.1	4.3	2.13	1.97734	0.42	No	No	No	No	2.01878	High PAL	female	Drinks Alcohol 3 or more times/week	No	No	No	0.449621	5.2	350	Yes			Yes	No	No	0.3	Tertiary	Highly Skilled	15-17	No	No	No	1.80829	No
156	18	53.6	169.5	56.8	No	Yes	18.6563	18.5-24.99 kg/m.sq	100	66	63.2	91.2	0.692982	No	4	5.8	3.1	0.86	2.12991	0.24	No	No	No	No	3.60465	High PAL	female	Drinks Alcohol 3 or more times/week	No	No	No	0.372861	4.3	5.5	No	98.4771	4.58982	No	No	Yes	0.6	Secondary	Highly Skilled	10-14	No	No	No	1.75786	No
157	20	75.5	159.5	76.3	Yes	Yes	29.6774	25-29.99 kg/m.sq	119	72	86.7333	108.4	0.800123	No	4.3	4.2	3.8	1.18	2.39982	0.48	No	No	No	No	3.22034	Low PAL	female	Drinks Alcohol 1-2 times/week	No	No	No	0.543783	6.8	11.7	No	68.9843	4.23388	No	No	No	1.75		Semi/Unskilled	0-9	No	No	No	1.43508	No
158	18	73.2	158	62.7	Yes	Yes	29.3222	25-29.99 kg/m.sq	103	69	93.5	100.5	0.930348	No	5.3	21.7	4.8	0.89	3.38706	1.14	No	Yes	No	Yes	5.39326	Moderate PAL	female	Drinks Alcohol 1-2 times/week	Yes	No		0.591772	7.8	1	No	83.1579	4.42074	No	Yes	No	3.25	Primary/All Age	Semi/Unskilled	0-9	Yes	Yes	Yes	3.07731	Yes
159	19	48.2	161	63.7	No	Yes	18.595	18.5-24.99 kg/m.sq	111	68	63.4	90.3667	0.701586	No	4.6	6.1	3.9	1.28	2.40899	0.46	No	No	No	No	3.04688	Moderate PAL	female	Rarely Drinks Alcohol	No	No	Yes	0.393789	4.1	2.5	No	83.4066	4.42373	No	No	No	0.95	Secondary	Skilled	10-14	No	No	No	1.80829	No
160	19	43.1	156.5	73.1	No	Yes	17.5974	<18.5 kg/m.sq.	112	84	59.6667	83	0.718876	No	4.8	3.1	4.1	1.17	2.74651	0.4	No	No	No	No	3.50427	Low PAL	female	Drinks Alcohol 1-2 times/week	No	Yes	No	0.381257	6.8	15.1	No	70.6498	4.25774	No	No	No	0.3	Tertiary	Highly Skilled	10-14	No	No	No	1.1314	No
161	18	111.1	154.9	45.1	Yes	Yes	46.3032	>=30 kg/m.sq	108	63	119.3	134.233	0.888751	No	4.5	17.4	4.2	1.16	2.88862	0.33	No	No	No	No	3.62069	High PAL	female	Drinks Alcohol 3 or more times/week	No	No	Yes	0.770174	6.4			113.341	4.7304		No	No		Secondary	Skilled	0-9	No	No	No	2.85647	Yes
162	19	52.6	164.7	63.7	No	No	19.3909	18.5-24.99 kg/m.sq	112	79	68.0667	88.6667	0.767669	No	4.5	3.7	4.3	1.88	2.24569	0.38	No	No	No	No	2.28723	Moderate PAL	female	Rarely Drinks Alcohol	No	No	Yes	0.413277	4.9	10.8	No	85.3234	4.44645	No	No	No		Secondary	Skilled	10-14	No	No	No	1.30833	No
163	19	59.2	177	63.7	No	No	18.8962	18.5-24.99 kg/m.sq	109	77	63.7	89.4	0.712528	No	4.7	7.1	5.3	1.61	3.53404	0.34	No	No	Yes	No	3.29193	Low PAL	female	Rarely Drinks Alcohol	No	No	No	0.359887	3.2	2.5	No	91.6954	4.51847	No	No	No	4.3	Secondary	Skilled	0-9	No	No	No	1.96009	No
164	18	56.8	170.3	53.9	No	Yes	19.5848	18.5-24.99 kg/m.sq	90	67	66.1	90.2	0.732816	No	4.7	6.8	5	1.1	3.48257	0.91	No	No	No	No	4.54545	Low PAL	female	Drinks Alcohol 3 or more times/week	Yes	No	No	0.388139	6.2	0.9	No	104.265	4.64694	No	No	Yes	0.3	Secondary	Skilled	10-14	No	No	No	1.91692	No
165	18	82.7	173	48	Yes	Yes	27.6321	25-29.99 kg/m.sq	115	59	83.2	107.3	0.775396	No	4.7	19.3	3.9	0.99	2.57055	0.74	No	No	No	No	3.93939	Low PAL	female	Rarely Drinks Alcohol	No	No	Yes	0.480925	9.7	1.6	No	118.938	4.7786	No	No	Yes	0.5	Tertiary	Semi/Unskilled	15-17	No	No	No	2.9601	Yes
166	18	78.3	168.8	86.2	Yes	Yes	27.48	25-29.99 kg/m.sq	114	75	89.4333	99.0667	0.902759	No	4	28	4.7	1.26	3.23816	0.44	No	No	No	No	3.73016	High PAL	female	Rarely Drinks Alcohol	No	No		0.529818	7.5	2.7	No	64.6218	4.16855	No	No	No				0-9	No	No	No	3.3322	Yes
167	18	67.9	164.9	59.8	No	No	24.9706	18.5-24.99 kg/m.sq	116	67	79.5	100.067	0.79447	Yes	4.1	8.6	6	1.41	4.36064	0.5	No	No	Yes	No	4.25532	Moderate PAL	female	Drinks Alcohol 1-2 times/week	No	No	Yes	0.48211	8.2	7.2	No	90.9983	4.51084	No	No	Yes	1.1	Secondary	Highly Skilled	15-17	No	No	No	2.15176	No
168	19	51.7	159.8	42		No	20.2459	18.5-24.99 kg/m.sq	117	67		84.9		No	4.2	2	4.9	1.31	3.07624	1.12	No	No	No	No	3.74046	Low PAL	female	Rarely Drinks Alcohol	Yes	No	Yes		9.3	2.9	No	125.557	4.83276	No	No	No	0.75	Secondary	Skilled	0-9	No	No	No	0.693147	No
169	19	71.7	159.5	71.5	Yes	Yes	28.1837	25-29.99 kg/m.sq	109	79	81.1333	102.133	0.794386	No	4.4		4	1.25	2.55275	0.43	No	No	No	No	3.2	Moderate PAL	female	Never Drank Alcohol	No	No	Yes	0.508673	5	1	No	73.6154	4.29885	No	No		1.9	Primary/All Age	Skilled	15-17	No	No	No		No
170	20	49.7	154	51.4	No	Yes	20.9563	18.5-24.99 kg/m.sq	105	70	68.9	90	0.765556	No	4.3	2	3.6	1.14	2.30862	0.33	No	No	No	No	3.15789	Moderate PAL	female	Drinks Alcohol 1-2 times/week	No	No		0.447403	5.8	2.9	No	98.8716	4.59382	No	No	No	2.45	Secondary	Skilled	10-14	No	No	No	0.693147	No
171	19	47.6	157.8	41.9	No	Yes	19.1158	18.5-24.99 kg/m.sq	111	81	65.5	87.3	0.750286	No	5.1		4.8	1.25	3.01789	1.16	No	No	No	Yes	3.84	Moderate PAL	female	Drinks Alcohol 1-2 times/week	Yes	Yes	No	0.415082	5.1	16.6	No	124.282	4.82255	No	No	No	1		Highly Skilled	10-14	No	No	No		No
172	18	90.5	171.4	50.9	Yes	No	30.8054	>=30 kg/m.sq	116	61	87	111.3	0.781671	No	4.1	14.1	5.5	1.64	3.6444	0.47	No	No	Yes	No	3.35366	Moderate PAL	female	Drinks Alcohol 3 or more times/week	No	No	Yes	0.507585	5.2	2.9	No	111.124	4.71064	No	No	No	4.85	Tertiary	Highly Skilled	0-9	No	No	No	2.64617	Yes
173	19	93.3	162.5	51.4	Yes	Yes	35.3325	>=30 kg/m.sq	114	73	100.5	119.8	0.838898	Yes	4.3	17.9	7.2	0.91	5.90009	0.85	No	No	Yes	No	7.91209	Low PAL	female	Rarely Drinks Alcohol	Yes	No	Yes	0.618462	6.1			104.329	4.64755		No	No	2.8	Secondary	Semi/Unskilled	10-14	No	Yes	No	2.8848	Yes
174	18	46	167.2	42.1	No	Yes	16.4545	<18.5 kg/m.sq.	92	65	61.9	85.3	0.725674	No	4.4	6.1	4.3	1.28	2.81817	0.44	No	No	No	No	3.35938	Low PAL	female	Drinks Alcohol 3 or more times/week	No	No	No	0.370215	9	8.7	No	131.059	4.87565	No	No	Yes	4.75	Secondary	Semi/Unskilled	0-9	No	No	No	1.80829	No
175	19	58.7	161.6	51.4	No	No	22.4779	18.5-24.99 kg/m.sq	103	46	71.5333	93	0.769176	No	4.3	2	4.6	1.47	2.92816	0.44	No	No	No	No	3.12925	Moderate PAL	female	Drinks Alcohol 3 or more times/week	No	No	No	0.442657	4.4	2.5	No	103.751	4.64199	No	No	No	0.7		Skilled	10-14	No	No	No	0.693147	No
176	19	80.3	155.9	38.8	Yes	Yes	33.0387	>=30 kg/m.sq	119	73	83.1667	107.833	0.771252	No	5.2	9.2	3.8	1.07	2.55569	0.38	No	No	No	Yes	3.5514	Moderate PAL	female	Drinks Alcohol 3 or more times/week	No	No	Yes	0.533462	6.5	4.3	No	132.595	4.8873	No	No	No	3.45	Secondary	Skilled	15-17	Yes	No	No	2.2192	No
177	19	48.5	154.6	42	No	Yes	20.2919	18.5-24.99 kg/m.sq	107	69	65.8667	92.5667	0.711559	No	4.3	5.5	4.3	1.27	2.86945	0.35	No	No	No	No	3.38583	Low PAL	female	Never Drank Alcohol	No	No	Yes	0.426046	5.9	8.3	No	121.471	4.79968	No	No		1	Secondary	Skilled	0-9	No	No	No	1.70475	No
178	18	54.1	159	56.8	No	Yes	21.3995	18.5-24.99 kg/m.sq	105	62	69.3	90.45	0.766169	No	4.6	8.6	3.7	1.16	2.17761	0.79	No	No	No	No	3.18966	Moderate PAL	female	Drinks Alcohol 1-2 times/week	Yes	No	No	0.435849	3.5	1.1	No	92.3768	4.52588	No	No	No	0.3	Secondary	Skilled	0-9	No	No	No	2.15176	No
179	18	53.4	163.5	39.2	No	No	19.9759	18.5-24.99 kg/m.sq	95	61	66	90.6333	0.728209	No	4.1	6	5.2	2.39	2.66321	0.32	No	No	No	No	2.17573	Low PAL	female	Never Drank Alcohol	No	No	No	0.40367	4.3	6.3	No	137.64	4.92464	No	No		0.3	Secondary	Highly Skilled	15-17	No	No	No	1.79176	No
180	20	40.8	160.6	54.5	No	No	15.8186	<18.5 kg/m.sq.	100	75	60.4667	78.3333	0.771915	No	3.9	2	4.6	1.52	2.91028	0.37	No	Yes	No	No	3.02632	Low PAL	female	Rarely Drinks Alcohol	No	No	No	0.376505	6.9	2.5	No	97.244	4.57722	No	Yes	Yes	0.9		Skilled	0-9	No	No	No	0.693147	No
181	18	115.2	156.5	56.8	Yes	Yes	47.0353	>=30 kg/m.sq	116	78	117.567	124.867	0.941538	No	4.5	14.2	4.6	0.75	3.59771	0.55	No	No	No	No	6.13333	Low PAL	female	Rarely Drinks Alcohol	No	No	Yes	0.751225	6	1.4	No	90.9243	4.51003	No	No	No		Secondary	Semi/Unskilled	0-9	No	No	No	2.65324	Yes
182	19	69.9	165.1	54.4	No	Yes	25.6438	25-29.99 kg/m.sq	130	89	79	98.8333	0.799325	No	4.5	4.5	5.1	1.16	3.63266	0.67	No	No	No	No	4.39655	Moderate PAL	female	Drinks Alcohol 3 or more times/week	No	Yes	No	0.478498	5	2.5	No	100.153	4.60669	No	No	Yes	1.1	Tertiary	Skilled	0-9	No	No	No	1.50408	No
183	19	54.6	160.7	48.1	No	No	21.1427	18.5-24.99 kg/m.sq	111	63	69.4667	93.5	0.742959	No	4.4		3.9	1.62	2.12404	0.34	No	No	No	No	2.40741	Low PAL	female	Rarely Drinks Alcohol	No	No	No	0.432275	4.3	1.1	No	110.252	4.70276	No	No	No	0.3	Secondary	Skilled	10-14	No	No	No		No
184	18	66.7	165.5	62.7	No	Yes	24.3517	18.5-24.99 kg/m.sq	99	69	73.9	96.5667	0.765274	No	4.2	8	3.9	0.99	2.71275	0.43	No	No	No	No	3.93939	Moderate PAL	female	Rarely Drinks Alcohol	No	No	Yes	0.446526	4.8	4	No	87.1053	4.46712	No	No	No	0.3	Secondary	Skilled	10-14	No	No	No	2.07944	No
185	19	60.6	161	57.5	No	No	23.3787	18.5-24.99 kg/m.sq	114	59	68.9667	96.3667	0.715669	No	5.3	10.2	4.9	1.82	2.88275	0.43	No	No	No	Yes	2.69231	Low PAL	female	Rarely Drinks Alcohol	No	No	No	0.428364	8.7	2.5	No	92.4	4.52613	No	No	No			Skilled	0-9	No	No	No	2.32239	Yes
186	19	96	162	38.9	Yes	Yes	36.5798	>=30 kg/m.sq	114	75	105.133	123.5	0.851282	No	5	19.5	3.4	1.16	1.78587	0.99	No	No	No	Yes	2.93103	Low PAL	female	Rarely Drinks Alcohol	Yes	No	Yes	0.648971	6.2	6.8	No	137.429	4.92311	No	No	No	1.8		Semi/Unskilled	0-9	Yes	Yes	Yes	2.97041	Yes
187	19	73.4	166.7	82.5	Yes	Yes	26.4134	25-29.99 kg/m.sq	123	76	81.5333	102.367	0.796483	No	4.7	14.7	3.8	1.09	2.5311	0.39	No	No	No	No	3.48624	Moderate PAL	female	Rarely Drinks Alcohol	No	Yes	Yes	0.489102	6.2	2.5	No	66.68	4.1999	No	No	No	2.9		Skilled	0-9	No	No	No	2.68785	Yes
188	19	45.4	153.1	79.3	No	Yes	19.3689	18.5-24.99 kg/m.sq	108	69	62.6333	90.4	0.692847	No	4.8	17.8	4.1	1.13	2.7911	0.39	No	No	No	No	3.62832	Low PAL	female	Drinks Alcohol 1-2 times/week	No	No	Yes	0.409101	4.8	3.5	No	63.7112	4.15436	No	No	No	0.4	Tertiary	Skilled	10-14	No	No	No	2.8792	Yes
189	18	59.3	164.9	50.9	No	Yes	21.8079	18.5-24.99 kg/m.sq	104	68	72.6333	92.2333	0.787495	No	4.4		3.6	1.08	2.31817	0.44	No	No	No	No	3.33333	High PAL	female	Rarely Drinks Alcohol	No	No	No	0.440469		5.7	No	106.91	4.67198	No	No	No	1	Secondary	Skilled	10-14	No	No	No		No
190	18	58.1	167.1	42.1	No	No	20.8077	18.5-24.99 kg/m.sq	112	67	71.9	94.8	0.758439	No	4.5	6.9	3.4	1.4	1.80734	0.42	No	No	No	No	2.42857	Low PAL	female	Drinks Alcohol 1-2 times/week	No	No	No	0.430281	6	4.4	No	130.981	4.87505	No	No	No	0.95		Skilled	0-9	No	No	No	1.93152	No
191	19	88.6	167.1	79.4	Yes	Yes	31.7308	>=30 kg/m.sq	112	64	97.5667	111.533	0.874776	No	4.3	12.5	4.9	1.05	3.44633	0.88	No	No	No	No	4.66667	Low PAL	female	Drinks Alcohol 1-2 times/week	Yes	No	No	0.583882	7.4	3.5	No	69.4496	4.2406	No	No	No	4.9	Secondary	Highly Skilled	0-9	No	Yes	No	2.52573	Yes
192	19	43.3	159.4	50.9	No	Yes	17.0416	<18.5 kg/m.sq.	100	73	58.7667	81.4	0.721949	Yes	3.6		6.5	1.28	4.94018	0.61	No	No	Yes	No	5.07812	Low PAL	female	Drinks Alcohol 1-2 times/week	No	No	Yes	0.368674	4.1	2.3	No	103.344	4.63806	No	No	No	1.2	Tertiary		10-14	No	No	No		No
193	19	59.5	162.5	54.5	No	No	22.5325	18.5-24.99 kg/m.sq	119	74	66.3	99.9333	0.663442	No	4.6	9.7	5	1.8	2.81009	0.85	No	No	No	No	2.77778	Moderate PAL	female	Drinks Alcohol 3 or more times/week	Yes	No	Yes	0.408	4.5	2.5	No	98.3945	4.58898	No	No	Yes	0.4	Secondary	Semi/Unskilled	0-9	No	No	No	2.27213	No
194	19	87.6	164.6	60.6	Yes	Yes	32.3329	>=30 kg/m.sq	118	69	89	115.5	0.770563	Yes	4.3	6.8	5.9	1.25	4.44817	0.44	No	No	Yes	No	4.72	Low PAL	female	Rarely Drinks Alcohol	No	No		0.540705	5.6	2.5	No	89.6337	4.49573	No	No	No	1.75	Primary/All Age	Semi/Unskilled	10-14	No	No	No	1.91692	No
195	19	72.3	163	76.3	Yes	No	27.2122	25-29.99 kg/m.sq	106	61	86.4667	102.4	0.844401	No	4.2	9.8	4.1	1.32	2.50477	0.6	No	No	No	No	3.10606	Low PAL	female	Rarely Drinks Alcohol	No	No	No	0.53047	6.6	21.2	No	70.498	4.25558	No	No	No	1	Primary/All Age		10-14	No	No	No	2.28238	Yes
196	18	71.9	171.9	53.9	No	Yes	24.332	18.5-24.99 kg/m.sq	113	60	71.6333	116.633	0.614175	No	4.6	6.2	3.9	1.1	2.68073	0.26	No	No	No	No	3.54545	Moderate PAL	female	Rarely Drinks Alcohol	No	No	Yes	0.416715	3.5	11.8	No	105.245	4.65629	No	No	No	1.85	Tertiary	Highly Skilled	0-9	No	No	No	1.82455	No
197	19	83.3	167.3	63.8	Yes	No	29.7614	25-29.99 kg/m.sq	103	77	84.1	117.2	0.717577	No	4.7	8.4	4.2	1.45	2.56651	0.4	No	No	No	No	2.89655	Moderate PAL	female	Rarely Drinks Alcohol	No	No	No	0.50269	5.4	2.5	No	86.5345	4.46054	No	No	No		Primary/All Age	Semi/Unskilled	10-14	No	No	No	2.12823	No
198	19	49.2	161.4	57.6	No	Yes	18.8868	18.5-24.99 kg/m.sq	118	82	61.3	88.3667	0.6937	No	4.2	4.1	4.8	1.27	3.18138	0.76	No	Yes	No	No	3.77953	Low PAL	female	Drinks Alcohol 1-2 times/week	Yes	Yes	No	0.379802	7.4	9	No	92.4688	4.52687	No	No	No	3.25	Tertiary	Skilled	10-14	No	No	No	1.41099	No
199	18	51.6	166.6	53.9	No	No	18.5909	18.5-24.99 kg/m.sq	102	73	68.4333	88.0667	0.777063	No	4.2		4.7	1.34	3.13982	0.48	No	No	No	No	3.50746	Moderate PAL	female	Drinks Alcohol 1-2 times/week	No	No		0.410764	5.1	2.5	No	102	4.62497	No	Yes	No		Secondary	Highly Skilled	15-17	No	No	No		No
200	18	57.7	165	42.1	No	Yes	21.1938	18.5-24.99 kg/m.sq	96	59	77.3	92.2	0.838395	No	4.3	3.9	4.7	0.86	3.49138	0.76	No	No	No	No	5.46512	Moderate PAL	female	Rarely Drinks Alcohol	Yes	No	Yes	0.468485	6.8	6.3	No	129.335	4.86241	No	No	No	0.3	Tertiary	Highly Skilled	10-14	No	No	No	1.36098	No
201	19	59.4	164.8	38.9	No	Yes	21.8712	18.5-24.99 kg/m.sq	110	69	70.2	96.2	0.72973	Yes	4.4	7.6	5.7	0.83	4.32872	1.18	No	No	Yes	No	6.86747	Moderate PAL	female	Rarely Drinks Alcohol	Yes	No	Yes	0.425971	4.8	9.3	No	139.805	4.94025	No	No	No	1.95	Tertiary	Highly Skilled	10-14	No	No	No	2.02815	No
202	19	63	158.9	45	No	No	24.9513	18.5-24.99 kg/m.sq	94	62	75	100	0.75	No	4.4	8.3	3.2	1.34	1.76367	0.21	No	No	No	No	2.38806	Moderate PAL	female	Rarely Drinks Alcohol	No	No	No	0.471995		2.2	No	116.527	4.75812	No	No	No	0.4	Tertiary	Skilled	15-17	No	No	No	2.11626	No
203	19	74.1	165.1	54.4	Yes	No	27.1847	25-29.99 kg/m.sq	117	63	80.4	106.8	0.752809	Yes	5	9	6.3	1.35	4.61514	0.73	No	No	Yes	Yes	4.66667	Low PAL	female		No	No	No	0.486978	7.7			100.153	4.60669		No	No	1.55		Semi/Unskilled	15-17	Yes	No	No	2.19722	No
204	18	50.3	161.9	48	No	No	19.19	18.5-24.99 kg/m.sq	94	50	62.2	88.6	0.702032	No	4.5	3.8	5.3	1.51	3.44596	0.75	No	No	Yes	No	3.50993	High PAL	female	Never Drank Alcohol	Yes	No	No	0.384188	3.4	4	No	111.306	4.71229	No	No		0.9	Tertiary	Highly Skilled	10-14	No	No	No	1.335	No
205	18	43.6	156.7	36.2	No	Yes	17.7561	<18.5 kg/m.sq.	96	72	59.7333	80.2	0.744805	No	4.1	8.4	4.7	1.02	3.49651	0.4	No	No	No	No	4.60784	Moderate PAL	female	Never Drank Alcohol	No	No	Yes	0.381195	7.3	4	No	142.848	4.96178	No	No		0.7	Tertiary	Skilled	0-9	No	No	No	2.12823	No
206	20	73.1	156.6	66.9	Yes	Yes	29.8081	25-29.99 kg/m.sq	103	63	83	113.9	0.728709	No	4.9	8.8	3.5	1.08	2.3145	0.23	No	No	No	No	3.24074	Moderate PAL	female	Drinks Alcohol 1-2 times/week	No	No	No	0.530013	5.5	3.8	No	77.2466	4.347	No	No	No		Secondary	Skilled	0-9	No	No	No	2.17475	No
207	19	80.3	169.6	51.4	Yes	No	27.9167	25-29.99 kg/m.sq	118	81	82.8667	107.167	0.77325	No	4.1	8.4	5.1	1.52	3.32771	0.55	No	No	No	No	3.35526	Moderate PAL	female	Rarely Drinks Alcohol	No	Yes		0.488601	6.1	3.7	No	108.887	4.69031	No	No	No	6.4	Tertiary	Highly Skilled	10-14	No	No	No	2.12823	No
208	19	101.2	157.4	73.1	Yes	Yes	40.848	>=30 kg/m.sq	108	60	110.8	131.867	0.840243	No	4.4	6.8	4.9	1.16	3.54734	0.42	No	No	No	No	4.22414	Low PAL	female	Drinks Alcohol 3 or more times/week	No	No	No	0.703939	10.7	2.8	No	71.0561	4.26347	No	No	No	8.6		Semi/Unskilled	10-14	No	No	No	1.91692	No
209	20	75.1	162	60.7	Yes	Yes	28.6161	25-29.99 kg/m.sq	113	73	80.8333	106.2	0.761143	No	5.1	6.6	4.7	1.25	3.16101	0.63	No	No	No	Yes	3.76	Moderate PAL	female	Drinks Alcohol 3 or more times/week	No	No	No	0.498971	5.6	2.5	No	88.0725	4.47816	No	No	Yes	0.3	Primary/All Age	Semi/Unskilled	0-9	Yes	No	No	1.88707	No
210	18	69.1	166.2	59.8	No	Yes	25.0159	25-29.99 kg/m.sq	111	77	79.0667	96.7	0.817649	No	4.8	8.7	4.1	0.78	3.08147	0.52	No	Yes	No	No	5.25641	Moderate PAL	female	Rarely Drinks Alcohol	No	No	Yes	0.475732	6.1	3.8	No	91.7157	4.51869	No	Yes	No	1.6	Tertiary	Skilled	15-17	No	No	No	2.16332	No
211	20	59.3	163	76.3	No	Yes	22.3192	18.5-24.99 kg/m.sq	110	69	70.9333	92.9333	0.763271	No	5.3	8.2	5.2	0.89	4.05312	0.56	No	No	No	Yes	5.8427	High PAL	female	Rarely Drinks Alcohol	No	No		0.435174	13.2	5.6	No	70.498	4.25558	No	No	No	0.3	Tertiary	Skilled	15-17	No	No	No	2.10413	No
212	19	51.3	164.4	85.6	No	No	18.9808	18.5-24.99 kg/m.sq	116	78	65.8667	88.4	0.745098	No	4	3.7	5.5	1.83	3.50028	0.37	No	No	Yes	No	3.00546	Moderate PAL	female	Rarely Drinks Alcohol	No	No	No	0.400649	5.4	5	No	63.3785	4.14912	No	No	No	1.85	Primary/All Age	Skilled	10-14	No	No	No	1.30833	No
213	19	51.3	159.6		No		20.1396	18.5-24.99 kg/m.sq	106	76	67	90.2	0.742794								No	No				Low PAL	female	Drinks Alcohol 3 or more times/week		No	Yes	0.419799							No	No		Secondary	Skilled	10-14	No	No	No		No
214	19	49.6	154.5	48.1	No	No	20.779	18.5-24.99 kg/m.sq	95	69	60.9667	90.7667	0.671686	No	4.4	2.8	4.6	1.33	3.10028	0.37	No	No	No	No	3.45865	Moderate PAL	female	Rarely Drinks Alcohol	No	No	Yes	0.394606	8	4	No	105.998	4.66342	No	No	No	0.3	Tertiary	Highly Skilled	10-14	No	No	No	1.02962	No
215	19	69.6	160.9	53.9	No	No	26.8842	25-29.99 kg/m.sq	103	69	79.7333	102.267	0.779661	No	3.9		4.9	1.38	3.23101	0.63	No	No	No	No	3.55072	Low PAL	female	Rarely Drinks Alcohol	No	No	Yes	0.495546	5.5	2.5	No	98.5102	4.59016	No	No	No	2.85	Tertiary	Highly Skilled	10-14	No	No	No		No
216	18	71.4	164.1	62.7	Yes	Yes	26.5144	25-29.99 kg/m.sq	107	80	84.9333	98.9	0.85878	Yes	4.5	15.7	6.7	0.71	5.37073	1.35	No	No	Yes	No	9.43662	Moderate PAL	female	Never Drank Alcohol	Yes	Yes	Yes	0.517571	9.7	2.1	No	86.3684	4.45862	No	No		2.3	Secondary		0-9	No	Yes	No	2.75366	Yes
217	18	48.5	168.6	56.8	No	No	17.0619	<18.5 kg/m.sq.	104	67	60.8	85.2	0.713615	No	4.6	10.2	4.5	1.42	2.8644	0.47	No	No	No	No	3.16901	Low PAL	female	Rarely Drinks Alcohol	No	No	Yes	0.360617	8.1	11	No	97.9542	4.5845	No	No	Yes	0.3		Semi/Unskilled	0-9	No	No	No	2.32239	Yes
218	18	50.2	165.4	39.2	No	Yes	18.3499	<18.5 kg/m.sq.	104	69	63	85.5	0.736842	No	3.8	3.9	4.1	0.86	2.94642	0.64	No	No	No	No	4.76744	Moderate PAL	female	Never Drank Alcohol	No	No	Yes	0.380895	3.8	7.4	No	139.24	4.9362	No	No		6.95	Tertiary	Highly Skilled	15-17	No	No	No	1.36098	No
219	20	63.7	162	60.7	No	Yes	24.2722	18.5-24.99 kg/m.sq	101	60	66.8667	101.067	0.66161	No	4.4	23.3	3.3	0.91	2.11477	0.6	No	No	No	No	3.62637	Moderate PAL	female	Drinks Alcohol 1-2 times/week	No	No	No	0.412757	5.7	2.5	No	88.0725	4.47816	No	No	No	2.7	Secondary	Skilled	10-14	No	No	No	3.14845	Yes
220	19	68.8	152	5.2	Yes	Yes	29.7784	25-29.99 kg/m.sq	97	46	80.1667	106.933	0.749688	No	4.3	8.3	4.9	1.01	3.39459	1.08	No	Yes	No	No	4.85149	Moderate PAL	female	Drinks Alcohol 3 or more times/week	Yes	No	Yes	0.527412	10.7	2.5	No				Yes	Yes	5.15	Secondary		10-14	No	Yes	No	2.11626	No
221	18	50	162.9	39.2	No	Yes	18.842	18.5-24.99 kg/m.sq	104	40	68.3	85.6	0.797897	No	4.5		3.8	1.22	2.23138	0.76	No	No	No	No	3.11475	Low PAL	female	Rarely Drinks Alcohol	Yes	No	No	0.419276	6.8	5.1	No	137.135	4.92097	No	No	No	2.05	Secondary	Skilled	10-14	No	No	No		No
222	18	66.3	164.7	56.8	No	No	24.4414	18.5-24.99 kg/m.sq	106	64	76.5	99.5	0.768844	No	4.5	21.8	5.1	1.53	3.33606	0.51	No	No	No	No	3.33333	Low PAL	female	Drinks Alcohol 1-2 times/week	No	No	No	0.464481	6.8	1	No	95.6884	4.5611	No	No	Yes	0.7	Secondary	Skilled	0-9	No	No	No	3.08191	Yes
223	19	48.5	158.7	60.6	No	Yes	19.257	18.5-24.99 kg/m.sq	108	80	65.5	87.9	0.745165	No		3.3	4.8	1.1	3.45229	0.54	No	No	No		4.36364	Low PAL	female	Never Drank Alcohol	No	Yes	No	0.412728	9.3	10.1	No	86.4208	4.45923	No	No		0.4	Secondary	Skilled	0-9	No	No	No	1.19392	No
224	18	59.5	168.4	48	No	No	20.9813	18.5-24.99 kg/m.sq	99	59	69.9333	94.3667	0.741081	No	4.2	7.3	3.9	1.33	2.36358	0.45	No	No	No	No	2.93233	Low PAL	female	Drinks Alcohol 3 or more times/week	No	No	No	0.415281	7.2	2.8	No	115.775	4.75165	No	No	Yes	3.3	Secondary	Skilled	0-9	No	No	No	1.98787	No
225	20	82.1	178.5	107.4	Yes	Yes	25.7672	25-29.99 kg/m.sq	90	57	80.4	105.633	0.761123	No	4.8	8.8	4.1	1.18	2.57138	0.76	No	No	No	No	3.47458	Moderate PAL	female	Rarely Drinks Alcohol	Yes	No	Yes	0.45042	5.8	7	No	54.8464	4.00454	Yes	No	Yes	8.7	Tertiary	Highly Skilled	10-14	No	Yes	No	2.17475	No
226	18	40	169.5	65.6	Yes	Yes	13.9226	<18.5 kg/m.sq.	108	49	82.4667	109.667	0.751976	No	4.1	11	5.4	1.26	3.76844	0.81	No	No	Yes	No	4.28571	Moderate PAL	female	Drinks Alcohol 3 or more times/week	Yes	No	No	0.486529	5.5	5.3	No	85.2668	4.44578	No	Yes	Yes	0.3	Secondary	Skilled	10-14	No	Yes	No	2.3979	Yes
227	19	60.6	170.9	48.1	No	Yes	20.7486	18.5-24.99 kg/m.sq	114	71	68.8	94.3667	0.729071	No	4.3	9.8	3.7	1.18	2.1989	0.7	No	No	No	No	3.13559	Low PAL	female	Drinks Alcohol 1-2 times/week	No	No	No	0.402575	8.1	3.9	No	117.249	4.7643	No	Yes	Yes	5.7	Secondary	Skilled	0-9	No	No	No	2.28238	Yes
228	19	66.5	176.4	51.2	No	No	21.371	18.5-24.99 kg/m.sq	99	59	72.0667	96.1	0.749913	No	4.7	11.7	3.8	1.44	2.13064	0.5	No	No	No	No	2.63889	Moderate PAL	female	Drinks Alcohol 3 or more times/week	No	No		0.408541	7.7	2.7	No	113.695	4.73352	No	No	Yes	0.75	Tertiary	Skilled	10-14	No	No	No	2.45959	Yes
229	18	65.4	166.2	50.9	No	No	23.6764	18.5-24.99 kg/m.sq	106	60	79.5	96.5	0.823834	No	4.2	9.5	3.7	1.33	2.25532	0.25	No	No	No	No	2.78195	Low PAL	female	Never Drank Alcohol	No	No	Yes	0.478339	7.1	23.1	No	107.752	4.67984	No	No		0.5	Secondary	Skilled	10-14	No	No	No	2.25129	No
230	19	57.5	162.4	60.6	No	Yes	21.802	18.5-24.99 kg/m.sq	112	67	70.0667	98.8	0.709177	No	3.7	7.4	3.6	1.1	2.36697	0.29	No	No	No	No	3.27273	Moderate PAL	female	Drinks Alcohol 1-2 times/week	No	No	Yes	0.431445	7.1	0.7	No	88.4356	4.48228	No	No	No	0.85	Secondary	Skilled	10-14	No	No	No	2.00148	No
231	18	43	160.8	48	No	No	16.6302	<18.5 kg/m.sq.	109	78	60.2333	83.2	0.723958	Yes	3.9	4.6	6.4	1.78	4.2622	0.78	No	No	Yes	No	3.59551	Low PAL	female	Never Drank Alcohol	Yes	No		0.374585	9.1	18.2	No	110.55	4.70547	No	No			Secondary	Skilled	0-9	No	No	No	1.52606	No
232	19	67.6	167	57.6	No	Yes	24.2389	18.5-24.99 kg/m.sq	108	67	71.5667	103.033	0.694597	No	4.5	7	2.5	0.89	1.49532	0.25	No	No	No	No	2.80899	Moderate PAL	female	Rarely Drinks Alcohol	No	No		0.428543	7.4	42.3	Yes	95.6771	4.56098	Yes	No	No	0.3	Tertiary	Skilled	0-9	No	No	No	1.94591	No
233	19	49.4	161.2	54.5	No	No	19.0106	18.5-24.99 kg/m.sq	124	68	66.3667	86.5333	0.766949	No	4.6	6.8	5	1.78	3.06404	0.34	No	No	No	No	2.80899	Low PAL	female	Drinks Alcohol 3 or more times/week	No	Yes	No	0.411704	10.1	2.7	No	97.6073	4.58095	No	No	No	0.7		Semi/Unskilled	10-14	No	No	No	1.91692	No
234	18	65.5	165.7	50.9	No	No	23.8559	18.5-24.99 kg/m.sq	116	68	77.5	94.6	0.819239	No	4.1	3	5.2	1.43	3.61404	0.34	No	No	No	No	3.63636	Low PAL	female	Never Drank Alcohol	No	No	No	0.467713	13.2	32.2	Yes	107.428	4.67682	Yes	No		1.15	Secondary	Skilled	0-9	No	No	No	1.09861	No
235	18	64.9	178.6	68.6	No	No	20.3461	18.5-24.99 kg/m.sq	110	60	69.3667	96.7	0.717339	No	4.7	4.3	3.3	1.62	1.56991	0.24	No	No	No	No	2.03704	High PAL	female	Drinks Alcohol 3 or more times/week	No	No	No	0.388391	3.5	16	No	85.9155	4.45336	No	No	No	0.3	Secondary	Skilled	15-17	No	No	No	1.45862	No
236	18	95.3	167.2	56.8	Yes	No	34.0895	>=30 kg/m.sq	107	60	88.6333	121.367	0.730294	No	4.8		5.7	1.4	3.61651	1.49	No	No	Yes	No	4.07143	Low PAL	female	Rarely Drinks Alcohol	Yes	No	Yes	0.530104	4.8	1.9	No	97.1408	4.57616	No	No	No	8.25	Secondary	Semi/Unskilled	0-9	No	Yes	No		No
237	18	85.3	171.9	68.6	Yes	Yes	28.8667	25-29.99 kg/m.sq	111	70	87.1333	101	0.862706	No	4.5	4.6	4.9	1.18	3.47229	0.54	No	No	No	No	4.15254	High PAL	female	Rarely Drinks Alcohol	No	No	No	0.506884	3.4	1.8	No	82.6924	4.41513	No	No	No	0.3	Primary/All Age	Skilled	0-9	No	No	No	1.52606	No
238	18	89	175.7	50.9	Yes	Yes	28.8301	25-29.99 kg/m.sq	111	72	81.4667	112.5	0.724148	No	4.7	17.1	4.6	1.08	3.25853	0.57	No	No	No	No	4.25926	High PAL	female	Rarely Drinks Alcohol	No	No	No	0.463669	8.1	5	No	113.912	4.73542	No	No	Yes	1.75	Tertiary	Highly Skilled	15-17	No	No	No	2.83908	Yes
239	19	63	172.6	73.1	No	Yes	21.1475	18.5-24.99 kg/m.sq	104	74	74	95.4	0.775681	No	5	2	4.5	1.18	3.07688	0.53	No	Yes	No	Yes	3.81356	Low PAL	female	Drinks Alcohol 3 or more times/week	No	No	No	0.428737	8.6	2.5	No	77.9179	4.35566	No	Yes	Yes	1.15	Secondary	Semi/Unskilled	10-14	No	No	No	0.693147	No
240	19	60.3	157.4	41.9	No	Yes	24.3393	18.5-24.99 kg/m.sq	114	61	77.1	99.3333	0.776174	No	5.1	14.4	4.4	1.18	2.83009	0.85	No	No	No	Yes	3.72881	Low PAL	female	Drinks Alcohol 3 or more times/week	Yes	No		0.489835	5.8	7.9	No	123.967	4.82001	No	No	No	1.2	Secondary	Skilled	0-9	No	No	No	2.66723	Yes
241	20	70.6	171.2	60.7	Yes	No	24.0878	18.5-24.99 kg/m.sq	120	78	80	103.567	0.772449	No	4.5	3.2	5.5	1.56	3.77028	0.37	No	No	Yes	No	3.52564	Low PAL	female	Never Drank Alcohol	No	Yes	Yes	0.46729	7.1	5.4	No	93.0741	4.5334	No	No		3.2	Secondary	Skilled	0-9	No	No	No	1.16315	No
242	20	49.2	170.5	73.1	No	No	16.9245	<18.5 kg/m.sq.	103	70	62.9	86.5	0.727168	No	4.6	2.4	4.4	1.61	2.62945	0.35	No	No	No	No	2.73292	Low PAL	female	Drinks Alcohol 1-2 times/week	No	No	No	0.368915	6.7	2.5	No	76.9699	4.34341	No	No	No	0.7	Secondary	Skilled	15-17	No	No	No	0.875469	No
243	18	44.9	162.1	39.2	No	Yes	17.0876	<18.5 kg/m.sq.	106	60	59.8	82	0.729268	No	4.4	8.4	5.4	1.26	3.79138	0.76	No	No	Yes	No	4.28571	Low PAL	female	Rarely Drinks Alcohol	Yes	No	No	0.368908	7.4	5.9	No	136.462	4.91604	No	No	No	0.3	Secondary	Skilled	15-17	No	No	No	2.12823	No
244	19	79.8	175	66.9	No	No	26.0571	25-29.99 kg/m.sq	121	73	79.8	107.567	0.741866	No	4.4	8.5	4.6	1.86	2.5978	0.31	No	No	No	No	2.47312	Moderate PAL	female	Drinks Alcohol 3 or more times/week	No	Yes		0.456	4.9	7.5	No	86.3229	4.45809	No	No	No		Tertiary	Skilled	10-14	No	No	No	2.14007	No
245	18	48.9	157	65.6	No	Yes	19.8385	18.5-24.99 kg/m.sq	96	70	64.5333	85.5333	0.754482	No		27.2	4.2	1.29	2.6256	0.62	No	No	No		3.25581	Moderate PAL	female	Drinks Alcohol 1-2 times/week	No	No	Yes	0.41104	7.2	11.3	No	78.9787	4.36918	No	Yes	Yes	1.35	Tertiary	Highly Skilled	15-17	No	No	No	3.30322	Yes
246	20	55.7	168.5	70	No	No	19.618	18.5-24.99 kg/m.sq	107	78	67.5	90.7667	0.743665	No	5.1	8	5.1	1.37	3.44101	0.63	No	No	No	Yes	3.72263	High PAL	female	Drinks Alcohol 3 or more times/week	No	No	Yes	0.400593	4.9	9.6	No	79.4357	4.37495	No	No	No	3.95		Semi/Unskilled	10-14	No	No	No	2.07944	No
247	19	63	163.5	70	No	Yes	23.567	18.5-24.99 kg/m.sq	116	59	75	99.5	0.753769	No	4.8	3.4	4.5	0.97	3.37862	0.33	No	No	No	No	4.63917	Low PAL	female	Never Drank Alcohol	No	No	No	0.458716	5.5	3.3	No	77.0786	4.34483	No	No		0.3	Tertiary	Semi/Unskilled	0-9	No	No	No	1.22378	No
248	18	70.1	166	48	No	Yes	25.4391	25-29.99 kg/m.sq	104	73	78.4	101.9	0.769382	No	4.7	5.4	4.3	1.11	2.91477	0.6	No	No	No	No	3.87387	Moderate PAL	female	Drinks Alcohol 1-2 times/week	No	No	No	0.472289	5.9	1.4	No	114.125	4.73729	No	No	No	1.1	Secondary	Highly Skilled	0-9	No	No	No	1.6864	No
249	19	58.6	162.7	48.1	No	Yes	22.1372	18.5-24.99 kg/m.sq	102	70	77	93.4	0.824411	No	4.3	2.9	3.2	1.24	1.80404	0.34	No	No	No	No	2.58065	Low PAL	female	Drinks Alcohol 1-2 times/week	No	No	Yes	0.473264	8.1	11.5	No	111.624	4.71513	No	No	No	0.55	Secondary	Semi/Unskilled	0-9	No	No	No	1.06471	No
250	19	46	155.2	57.6	No	No	19.0974	18.5-24.99 kg/m.sq	115	69	60.8667	82.9667	0.733628	No	4.5	7.8	5.4	1.32	3.81853	0.57	No	Yes	Yes	No	4.09091	High PAL	female	Drinks Alcohol 3 or more times/week	No	No	Yes	0.392182	5.6	22.8	No	88.9167	4.4877	No	Yes	No	1.05	Primary/All Age	Highly Skilled	15-17	No	No	No	2.05412	No
251	19	75.2	150.5	76.2	Yes	No	33.2005	>=30 kg/m.sq	118	76	90.6	106.267	0.852572	No	3.9	4.4	4.1	1.87	1.97771	0.55	No	No	No	No	2.19251	Moderate PAL	female	Rarely Drinks Alcohol	No	No	No	0.601993	9.3	10.2	No	65.1772	4.17711	No	No	No	6.4	Secondary	Skilled	15-17	No	No	No	1.4816	No
252	19	60.2	160.8	57.5	No	Yes	23.2822	18.5-24.99 kg/m.sq	103	74	77.5	100.9	0.768087	No	4.7	6.1	5.1	1.18	3.73193	0.41	No	No	No	No	4.32203	Moderate PAL	female	Rarely Drinks Alcohol	No	No	Yes	0.481965	5.4	2.5	No	92.2852	4.52488	No	No	No	0.8	Tertiary	Highly Skilled	10-14	No	No	No	1.80829	No
253	19	38.1	151.3	38.8	No	No	16.6436	<18.5 kg/m.sq.	108	71	52.2667	77.6333	0.67325	No	4.5	9.1	4.3	1.71	2.39734	0.42	No	No	No	No	2.51462	Moderate PAL	female	Drinks Alcohol 3 or more times/week	No	No		0.345451	5.8	2	No	128.683	4.85735	No	No	No	0.3	Secondary	Highly Skilled	10-14	No	No	No	2.20827	No
254	19	52.4	168.2		No	No	18.5216	18.5-24.99 kg/m.sq	99	75	63.3	92.1667	0.686799	No	4.3	5.3	3.8	1.56	2.17119	0.15	No	No	No	No	2.4359	High PAL	female	Drinks Alcohol 1-2 times/week	No	No	Yes	0.376338	4.1	9.6	No				No	No	0.3	Tertiary	Highly Skilled	10-14	No	No	No	1.66771	No
255	19	43.3	170.8	57.5	No	Yes	14.8427	<18.5 kg/m.sq.	94	59	58.2333	84.7333	0.687254	Yes	4.5	4.7	5.8	1.26	4.27853	0.57	No	No	Yes	No	4.60317	Low PAL	female	Rarely Drinks Alcohol	No	No		0.340945	5.9	12.9	No	98.0244	4.58522	No	No	No	0.4	Secondary	Semi/Unskilled	0-9	No	No	No	1.54756	No
256	19	78.8	175.8	38.8	Yes	Yes	25.497	25-29.99 kg/m.sq	123	81	82.4	109.067	0.755501	No	5.2	15.4	3.2	0.89	2.03018	0.61	No	No	No	Yes	3.59551	Low PAL	female	Rarely Drinks Alcohol	No	Yes	Yes	0.468714	5.5	4.4	No	149.521	5.00743	No	No	No	0.65	Secondary	Semi/Unskilled	10-14	Yes	No	No	2.73437	Yes
257	19	98.2	169	57.5	Yes	Yes	34.3825	>=30 kg/m.sq	116	71	97.2333	120.233	0.808705	No	4.7	12.7	3.7	0.72	2.82404	0.34	No	No	No	No	5.13889	Low PAL	female	Never Drank Alcohol	No	No	Yes	0.575345	6.7	2.9	No	96.9913	4.57462	No	No			Primary/All Age		10-14	No	No	No	2.5416	Yes
258	18	55.9	168.9	83.3	No	No	19.5953	18.5-24.99 kg/m.sq	112	80	66.2	87.0667	0.760337	No	3.4	3.2	4.1	1.63	2.22229	0.54	No	No	No	No	2.51534	Low PAL	female	Rarely Drinks Alcohol	No	Yes		0.391948	7.8	2.5	No	66.9112	4.20337	No	No	No	0.65	Secondary	Skilled	10-14	No	No	No	1.16315	No
259	19	61.2	166.7	57.5	No	Yes	22.0232	18.5-24.99 kg/m.sq	105	75	69.5	94.7667	0.73338	No	4.4	6.9	4.1	1.14	2.7444	0.47	No	No	No	No	3.59649	Moderate PAL	female	Rarely Drinks Alcohol	No	No	Yes	0.416917	10.3	5.9	No	95.6713	4.56092	No	No	No	0.3	Secondary	Semi/Unskilled	10-14	No	No	No	1.93152	No
260	18	60.3	161.1	59.8	No	No	23.2341	18.5-24.99 kg/m.sq	100	60	69.3333	94	0.737589	No	4.2	6.9	4.3	1.36	2.74275	0.43	No	No	No	No	3.16176	Moderate PAL	female	Rarely Drinks Alcohol	No	No	Yes	0.430375	6.3	12.2	No	88.9013	4.48753	No	No	No	0.6	Secondary	Skilled	0-9	No	No	No	1.93152	No
261	19	57.9	168.3	48.2	No	Yes	20.4414	18.5-24.99 kg/m.sq	110	60	73.2	93.3	0.784566	No	4.3	7.1	4.9	1.24	3.32055	0.74	No	No	No	No	3.95161	Low PAL	female	Drinks Alcohol 1-2 times/week	No	No	No	0.434938	5.9	2.5	No	115.226	4.7469	No	No	Yes	0.3	Secondary	Skilled	15-17	No	No	No	1.96009	No
262	18	68.1	153.9	30.4	Yes	Yes	28.7521	25-29.99 kg/m.sq	96	73	87.5	104.8	0.834924	No	4.4	6.7	4.6	1.24	3.1444	0.47	No	No	No	No	3.70968	Moderate PAL	female	Rarely Drinks Alcohol	No	No	Yes	0.568551	4.1	2	No	167.062	5.11837	No	No	No	4.3	Secondary	Semi/Unskilled	10-14	No	No	No	1.90211	No
263	19	53.5	163.6	60.7	No	Yes	19.9888	18.5-24.99 kg/m.sq	99	64	66.4667	86.6333	0.767218	No	4.2	5.2	4.4	1.19	3.05404	0.34	No	No	No	No	3.69748	Low PAL	female	Never Drank Alcohol	No	No		0.406275	5.7	3.4	No	88.9423	4.48799	No	No			Secondary	Highly Skilled	15-17	No	No	No	1.64866	No
264	19	61.6	150	60.7	No	Yes	27.3778	25-29.99 kg/m.sq	93	64	78	101.5	0.768473	No	4.5	7.5	4.7	1.1	3.34312	0.56	No	No	No	No	4.27273	Low PAL	female	Never Drank Alcohol	No	No	No	0.52	8.1	11.9	No	81.5486	4.4012	No	No		3.85		Semi/Unskilled	10-14	No	No	No	2.0149	No
265	19	63.6	175.9	66.9	No	No	20.5554	18.5-24.99 kg/m.sq	119	78	74.4667	97.1333	0.766644	No	4.5	3.6	4.3	1.59	2.52193	0.41	No	No	No	No	2.7044	Moderate PAL	female	Rarely Drinks Alcohol	No	No	Yes	0.423347	4.9	7.5	No	86.7668	4.46322	No	No	No	0.3	Primary/All Age	Skilled	0-9	No	No	No	1.28093	No
267	19	42.8	152.8	82.4	No	Yes	18.3315	<18.5 kg/m.sq.	107	69	58.9333	81.6667	0.721633	No	4.2	6.1	3.3	0.71	2.1955	0.86	No	No	No	No	4.64789	Low PAL	female	Rarely Drinks Alcohol	Yes	No	Yes	0.385689	4.2	6.7	No	61.1942	4.11405	No	No	No	0.3	Tertiary	Highly Skilled	10-14	No	No	No	1.80829	No
268	18	67.1	174.7	71.5	No	No	21.9855	18.5-24.99 kg/m.sq	99	70	60.1667	95.2	0.632003	No	4	8.2	5.2	1.47	3.4456	0.62	No	No	No	No	3.53741	Moderate PAL	female	Drinks Alcohol 1-2 times/week	No	No		0.3444	8.1	60.2	Yes	80.6308	4.38988	Yes	No	No		Tertiary	Highly Skilled	10-14	No	No	No	2.10413	No
269	19	75.5	167	45.1	Yes	Yes	27.0716	25-29.99 kg/m.sq	110	63	85.8	106.233	0.807656	No	4.4	9.8	4.5	1.29	2.91183	0.65	No	No	No	No	3.48837	Low PAL	female	Rarely Drinks Alcohol	No	No	Yes	0.513772	4.7	2.5	No	122.195	4.80562	No	No	No	2.05		Skilled	10-14	No	No	No	2.28238	Yes
270	18	51.1	156.4	53.9	No	Yes	20.8904	18.5-24.99 kg/m.sq	107	65	63.4	89.9	0.705228	No	4.6	4.3	4.6	1.17	3.19605	0.51	No	No	No	No	3.93162	High PAL	female	Rarely Drinks Alcohol	No	No	Yes	0.405371	8.4	8.1	No	95.7551	4.56179	No	No	No	0.3	Tertiary	Skilled	10-14	No	No	No	1.45862	No
271	19	55.2	163.4	41.9	No	Yes	20.6745	18.5-24.99 kg/m.sq	98	49	72.1667	92.0333	0.784136	No	4.9	6.8	3	0.77	1.78046	0.98	No	No	No	No	3.8961	Moderate PAL	female	Drinks Alcohol 1-2 times/week	Yes	No	Yes	0.441656	8.2	2.5	No	128.692	4.85742	No	No	Yes	2.05	Tertiary	Highly Skilled	15-17	No	No	No	1.91692	No
272	19	61.8	156.6	51.4	No	No	25.2003	25-29.99 kg/m.sq	107	70	73.1	99.2	0.736895	No	4.8	12.6	4.4	1.5	2.61101	0.63	No	No	No	No	2.93333	High PAL	female	Rarely Drinks Alcohol	No	No	No	0.466794	5.6	9.2	No	100.541	4.61056	No	No	No	1.75	Secondary	Skilled	10-14	No	No	No	2.5337	Yes
273	19	66.6	168	62.7	No	Yes	23.5969	18.5-24.99 kg/m.sq	117	57	75.2	97.5667	0.770755	No	4.2		4.1	0.93	3.00486	0.36	No	No	No	No	4.4086	Low PAL	female	Rarely Drinks Alcohol	No	No	Yes	0.447619	6.7	1.4	No	88.4211	4.48211	No	Yes	No	0.85	Secondary	Highly Skilled	10-14	No	No	No		No
274	20	71.8	165.5	88.7	No	Yes	26.2137	25-29.99 kg/m.sq	120	70	76.6333	105.967	0.723183	No	3.9	2.6	3.9	0.97	2.49881	0.94	No	No	No	No	4.02062	Moderate PAL	female	Drinks Alcohol 1-2 times/week	Yes	Yes	No	0.463041	7.9	4	No	61.5727	4.12022	No	No	Yes		Secondary	Semi/Unskilled	10-14	No	No	No	0.955511	No
275	19	54.6	168.1	45.1	No	Yes	19.3222	18.5-24.99 kg/m.sq	109	77	70.9	92.8667	0.76346	No	4.3	5.4	4.3	1.25	2.79312	0.56	No	No	No	No	3.44	Moderate PAL	female	Rarely Drinks Alcohol	No	No	Yes	0.421773	3.7	2.5	No	123	4.81218	No	No	No	0.3	Secondary	Semi/Unskilled	10-14	No	No	No	1.6864	No
276	18	57	166.7	53.9	No	Yes	20.5118	18.5-24.99 kg/m.sq	98	56	66.4	90.6	0.732892	No	4.6	6.8	3.7	1	2.47064	0.5	No	No	No	No	3.7	Moderate PAL	female	Rarely Drinks Alcohol	No	No	No	0.39832	5.4	8.5	No	102.061	4.62557	No	No	No	0.5	Primary/All Age	Semi/Unskilled	0-9	No	No	No	1.91692	No
277	19	77.7	171	70	Yes	Yes	26.5723	25-29.99 kg/m.sq	121	74	81.5	107.5	0.75814	No	5.2	6.8	3.3	1.22	1.9011	0.39	No	No	No	Yes	2.70492	High PAL	female	Rarely Drinks Alcohol	No	Yes	No	0.476608	4.4	2.5	No	80.6143	4.38968	No	No	No	3.6	Primary/All Age	Highly Skilled	10-14	Yes	No	No	1.91692	No
278	18	102.2	157.9	56.8	Yes	No	40.9908	>=30 kg/m.sq	116	83	98.3	129.9	0.756736	No	4.4	16.9	4.9	1.37	3.26395	0.58	No	No	No	No	3.57664	High PAL	female	Drinks Alcohol 3 or more times/week	No	Yes	Yes	0.622546	8.7	1.1	No	91.7377	4.51893	No	No	Yes	6.6	Secondary	Highly Skilled	10-14	No	No	No	2.82731	Yes
279	19	53.6	166.2		No		19.4045	18.5-24.99 kg/m.sq	115	69	69.6333	91.2667	0.762966								No	No				Low PAL	female	Rarely Drinks Alcohol		No		0.418973							No	Yes		Tertiary	Highly Skilled	10-14	No	No	No		No
280	19	46.5	156.8	60.7	No	No	18.913	18.5-24.99 kg/m.sq	105	72	62	89.3	0.694289	No	4.1	5.7	5.2	1.5	3.51651	0.4	No	No	No	No	3.46667	Moderate PAL	female	Never Drank Alcohol	No	No		0.395408	6.4	2.5	No	85.2455	4.44554	No	No			Tertiary	Highly Skilled	10-14	No	No	No	1.74047	No
281	19	75.3	165.4	60.7	Yes	No	27.5248	25-29.99 kg/m.sq	101	66	87.5	109.1	0.802016	No	4.8	9	3.8	1.37	2.29239	0.3	No	No	No	No	2.77372	Low PAL	female	Never Drank Alcohol	No	No	No	0.529021	5.2	2	No	89.9209	4.49893	No	No		0.3		Semi/Unskilled	0-9	No	No	No	2.19722	No
282	20	61.7	160.2	45.1	No	Yes	24.0414	18.5-24.99 kg/m.sq	111	71	73.6667	98	0.751701	No	4.1	3.2	4.2	1.2	2.83486	0.36	No	No	No	No	3.5	Low PAL	female	Drinks Alcohol 1-2 times/week	No	No	No	0.459842	8.9	11.7	No	117.22	4.76405	No	No	No	0.3	Secondary	Skilled	0-9	No	No	No	1.16315	No
283	19	56	166.4	66.8	No	No	20.2247	18.5-24.99 kg/m.sq	117	77	67.6667	90.9333	0.744135	No	4.5	3.1	5.1	1.4	3.43853	0.57	No	No	No	No	3.64286	Moderate PAL	female	Never Drank Alcohol	No	No		0.406651	8.6	9.1	No	82.2036	4.4092	No	No		0.3	Tertiary	Skilled	10-14	No	No	No	1.1314	No
284	19	68.2	163	101.1	Yes	Yes	25.669	25-29.99 kg/m.sq	107	67	86.8333	99.1667	0.87563	No	4.4	16.5	5.1	0.99	3.7889	0.7	No	No	No	No	5.15152	Moderate PAL	female	Rarely Drinks Alcohol	No	No	No	0.53272	6.2	2.5	No	53.2048	3.97415	Yes	No	No	0.3		Semi/Unskilled	0-9	No	No	No	2.80336	Yes
285	19	58.5	170.7	26.5	No	Yes	20.0765	18.5-24.99 kg/m.sq	103	67	70.7667	93.9667	0.753104	No	4.7	6.1	4.6	1	3.17339	0.93	No	No	No	No	4.6	Moderate PAL	female	Rarely Drinks Alcohol	Yes	No	No	0.414568	2	38.9	Yes	212.57	5.35927	Yes	No	No	1	Secondary	Semi/Unskilled	10-14	No	No	No	1.80829	No
286	19	96	172.6	48.2	Yes	Yes	32.2248	>=30 kg/m.sq	109	88	99.5	119.9	0.829858	No	4.3		4.8	1.1	3.19541	1.1	No	No	No	No	4.36364	Low PAL	female	Rarely Drinks Alcohol	Yes	Yes		0.576477	9.7	4.9	No	118.17	4.77213	No	Yes	No	7.9	Secondary	Semi/Unskilled	10-14	No	Yes	No		No
287	19	56	169.2	63.8	No	Yes	19.5608	18.5-24.99 kg/m.sq	111	67	65.1667	91.3	0.713764	No	4.5	5.8	4.1	1.17	2.6456	0.62	No	No	No	No	3.50427	Low PAL	female	Rarely Drinks Alcohol	No	No	No	0.385146	4.2	12.6	No	87.5172	4.47184	No	No	No		Secondary	Semi/Unskilled	10-14	No	No	No	1.75786	No
288	18	71	167.6	62.7	No	No	25.2761	25-29.99 kg/m.sq	122	67	74.5	105.067	0.709074	No	4.5	12.4	5.5	1.38	3.88605	0.51	No	No	Yes	No	3.98551	High PAL	female	Never Drank Alcohol	No	Yes	Yes	0.444511	5.8	9.5	No	88.2105	4.47973	No	No		1.2	Secondary	Skilled	10-14	No	No	No	2.5177	Yes
289	18	57.4	174.5	50.9	No	Yes	18.8504	18.5-24.99 kg/m.sq	118	78	69	89.5	0.77095	No	4.5	6.3	3.7	1.29	2.10266	0.67	No	No	No	No	2.86822	Moderate PAL	female	Rarely Drinks Alcohol	No	No	Yes	0.395415	9.4	3.9	No	113.134	4.72857	No	No	No	0.3	Secondary		10-14	No	No	No	1.84055	No
290	19	56.1	164.6	54.5	No	Yes	20.7063	18.5-24.99 kg/m.sq	99	64	72.3	91.2333	0.792474	No	4.2	2	4.1	1.28	2.63651	0.4	No	No	No	No	3.20312	Low PAL	female	Drinks Alcohol 1-2 times/week	No	No	No	0.439247	4.9	2.5	No	99.6661	4.60183	No	No	No	0.3	Primary/All Age	Skilled	10-14	No	No	No	0.693147	No
291	18	53.3	155.9	56.8	No	Yes	21.9298	18.5-24.99 kg/m.sq	106	62	68.5	90.5	0.756906	No	4.7	10	3.8	1.11	2.46523	0.49	No	No	No	No	3.42342	Moderate PAL	female	Drinks Alcohol 1-2 times/week	No	No	Yes	0.439384	4.4	22.3	No	90.5757	4.50619	No	No	Yes	0.6	Secondary	Skilled	10-14	No	No	No	2.30259	Yes
292	18	58.3	157.8	33.3	No	Yes	23.4129	18.5-24.99 kg/m.sq	107	68	68.7	99.2	0.69254	No	4.5	8.3	4.6	1.15	3.2344	0.47	No	No	No	No	4	High PAL	female	Rarely Drinks Alcohol	No	No	Yes	0.435361	5.4	9.8	No	156.378	5.05228	No	No	No		Tertiary	Highly Skilled	10-14	No	No	No	2.11626	No
293	19	50.9	162.4	38.8	No	Yes	19.2995	18.5-24.99 kg/m.sq	119	69	67.6333	93.5	0.723351	No	4.8	5.5	5.4	1.16	4.04275	0.43	No	Yes	Yes	No	4.65517	Low PAL	female	Drinks Alcohol 3 or more times/week	No	No	Yes	0.416461		13.3	No	138.124	4.92815	No	No	No	0.3	Tertiary	Skilled	10-14	No	No	No	1.70475	No
294	19	49.5	162.3	66.8	No	Yes	18.7918	18.5-24.99 kg/m.sq	123	86	70.6333	91.2	0.774488	Yes	4.4	2.3	5.9	1.27	4.44193	0.41	No	No	Yes	No	4.64567	High PAL	female	Rarely Drinks Alcohol	No	Yes	No	0.435202	5.6	2.5	No	80.1781	4.38425	No	No	Yes	1.6	Secondary	Skilled	0-9	No	No	No	0.832909	No
295	18	73.7	172.4	56.8	Yes	Yes	24.7966	18.5-24.99 kg/m.sq	100	65	80.2	101.3	0.791708	No	4.4	6.3	3.1	1.22	1.61394	0.58	No	No	No	No	2.54098	High PAL	female	Rarely Drinks Alcohol	No	No	No	0.465197	4.9	10.9	No	100.162	4.60679	No	No	No	1.45	Tertiary	Skilled	10-14	No	No	No	1.84055	No
296	18	43.2	160.9	42.1	No	No	16.6867	<18.5 kg/m.sq.	106	54	57.2	85.7	0.667445	No	4.4	3.9	4.4	1.32	2.70385	0.82	No	No	No	No	3.33333	Moderate PAL	female	Rarely Drinks Alcohol	Yes	No	No	0.3555	5.5	27.2	No	126.121	4.83724	No	No	No	0.3	Tertiary	Highly Skilled	10-14	No	No	No	1.36098	No
297	19	77	158.7	54.5	Yes	No	30.5729	>=30 kg/m.sq	108	69	97.1667	99.9667	0.971991	No	4.5	6.2	4	1.32	2.49651	0.4	No	No	No	No	3.0303	Low PAL	female	Rarely Drinks Alcohol	No	No	No	0.612266	5.2	10.7	No	96.0936	4.56532	No	No	No	7.05		Skilled	0-9	No	No	No	1.82455	No
298	19	69.9	162.1	51.2	No	No	26.6018	25-29.99 kg/m.sq	100	64	77.6667	104.267	0.744885	No	4.5	5	6	1.76	3.96477	0.6	No	Yes	Yes	No	3.40909	High PAL	female	Drinks Alcohol 3 or more times/week	No	No	No	0.479128	5.1	13.4	No	104.479	4.64898	No	No	No	0.6	Tertiary	Highly Skilled	15-17	No	No	No	1.60944	No
299	18	54.6	169		No		19.117	18.5-24.99 kg/m.sq	109	70	66	93.9	0.702875								No	No				Low PAL	female	Never Drank Alcohol		No	Yes	0.390533							No			Secondary	Skilled	10-14	No	No	No		No
300	19	72.1	160.5	51.2	Yes	Yes	27.9889	25-29.99 kg/m.sq	110	80	88.5667	103.533	0.855441	No	4.3	4.3	3.4	0.86	2.41615	0.27	No	Yes	No	No	3.95349	Moderate PAL	female	Rarely Drinks Alcohol	No	Yes	Yes	0.551817	6.5	3	No	103.447	4.63906	No	No	No	0.3	Secondary		10-14	No	No	No	1.45862	No
301	18	54.8	160.2	42.1	No	Yes	21.3528	18.5-24.99 kg/m.sq	106	68	66.7	91	0.732967	No	4	10	3.4	0.96	2.21982	0.48	No	No	No	No	3.54167	Low PAL	female	Drinks Alcohol 1-2 times/week	No	No	No	0.416355	4.7	0.8	No	125.572	4.83288	No	No	No	0.3	Secondary	Skilled	0-9	No	No	No	2.30259	Yes
302	18	44.5	153.6		No		18.8616	18.5-24.99 kg/m.sq	103	62	58.4	83.3	0.70108								No	No				Low PAL	female	Drinks Alcohol 1-2 times/week		No		0.380208							Yes	No		Primary/All Age	Skilled	10-14	No	No	No		No
303	19	57.9	173	70	No	No	19.3458	18.5-24.99 kg/m.sq	94	62	70	92.5333	0.756484	No	4.5	19.1	4.5	1.36	2.80514	0.73	No	Yes	No	No	3.30882	Low PAL	female	Drinks Alcohol 3 or more times/week	No	No	Yes	0.404624	6.7	5.9	No	81.5571	4.4013	No	Yes	No	0.7	Tertiary	Highly Skilled	10-14	No	No	No	2.94969	Yes
304	18	48.2	158.5	48	No	No	19.1862	18.5-24.99 kg/m.sq	93	55	66.5	85.3333	0.779297	No	4.8	7.6	5.3	1.46	3.46844	0.81	No	No	Yes	No	3.63014	Moderate PAL	female	Rarely Drinks Alcohol	Yes	No	No	0.419558	6.8	8.8	No	108.969	4.69106	No	No	No	0.9		Skilled	0-9	No	No	No	2.02815	No
305	19	90.4	162.1	66.9	Yes	Yes	34.4035	>=30 kg/m.sq	113	62	93.6333	115.333	0.81185	No	4.4	5	3.9	1.28	2.4778	0.31	No	No	No	No	3.04688	Low PAL	female	Rarely Drinks Alcohol	No	No	No	0.577627	5.3	8.4	No	79.9596	4.38152	No	No	No	7.85	Primary/All Age	Skilled	0-9	No	No	No	1.60944	No
306	19	103	166.5	42	Yes	Yes	37.1543	>=30 kg/m.sq	114	58	103.5	119.6	0.865385	No	4.3	8.7	3.5	1.09	2.15312	0.56	No	No	No	No	3.21101	Moderate PAL	female	Drinks Alcohol 1-2 times/week	No	No	Yes	0.621622	7.8	5	No	130.821	4.87383	No	No	No	8.5	Secondary	Skilled	10-14	No	No	No	2.16332	No
307	18	63.6	171.1	56.8	No	Yes	21.7249	18.5-24.99 kg/m.sq	104	54	72.2	96.7	0.746639	No	4.5	8.4	4.2	0.87	3.09605	0.51	No	No	No	No	4.82759	Low PAL	female	Rarely Drinks Alcohol	No	No	No	0.421975	6.7	1.2	No	99.4067	4.59922	No	No	No		Secondary	Skilled	10-14	No	No	No	2.12823	No
308	19	53.1	167.7	51.4	No	Yes	18.8811	18.5-24.99 kg/m.sq	104	73	64.1333	89.2667	0.718447	No	4.3	4.2	4	1.26	2.62073	0.26	No	No	No	No	3.1746	Moderate PAL	female	Drinks Alcohol 3 or more times/week	No	No		0.382429	3.4	39.6	Yes	107.667	4.67905	Yes	No	Yes	0.3	Tertiary	Highly Skilled	10-14	No	No	No	1.43508	No
309	20	49.7	162.2	51.4	No	Yes	18.891	18.5-24.99 kg/m.sq	112	81	69.2667	86.9667	0.796474	No	4.9	7.6	3.8	1	2.5156	0.62	No	No	No	No	3.8	Low PAL	female	Drinks Alcohol 3 or more times/week	No	Yes		0.427045	6	9.1	No	104.136	4.6457	No	No	Yes		Secondary	Skilled	10-14	No	No	No	2.02815	No
310	19	57.2	162	79.3	No	No	21.7955	18.5-24.99 kg/m.sq	102	65	70.1	94	0.745745	No	4.2	6.5	3.2	1.79	1.32743	0.18	No	No	No	No	1.78771	High PAL	female	Rarely Drinks Alcohol	No	No	No	0.432716	5.7	232	Yes	67.4149	4.21087	Yes	No	No	0.5	Tertiary	Highly Skilled	10-14	No	No	No	1.8718	No
311	18	55.1	163.9	53.9	No	Yes	20.5113	18.5-24.99 kg/m.sq	101	65	68.6333	87.7	0.782592	No	4.9	5.3	4.2	0.79	3.15312	0.56	No	No	No	No	5.31646	Moderate PAL	female	Drinks Alcohol 1-2 times/week	No	No	No	0.418751	5.6	5.7	No	100.347	4.60863	No	No	No	0.8	Tertiary	Highly Skilled	10-14	No	No	No	1.66771	No
312	18	53.8	155.6	65.6	No	Yes	22.221	18.5-24.99 kg/m.sq	95	64	66.4333	94	0.706738	No	4.4	9.3	2.8	1.07	1.61991	0.24	No	No	No	No	2.61682	Moderate PAL	female	Rarely Drinks Alcohol	No	No	No	0.426949	7.3	4.6	No	78.2744	4.36022	No	No	Yes	0.3	Tertiary	Highly Skilled	10-14	No	No	No	2.23001	No
313	18	55.3	164.9	56.8	No	Yes	20.3369	18.5-24.99 kg/m.sq	103	62	67.1	89.8	0.747216	No	3.8		4.4	1.27	2.90982	0.48	No	No	No	No	3.46457	Low PAL	female	Never Drank Alcohol	No	No	No	0.406913	8.3			95.8046	4.56231		No		0.3	Secondary	Semi/Unskilled	10-14	No	No	No		No
314	19	68.5	168.5	51.4	No	No	24.1263	18.5-24.99 kg/m.sq	122	81	71.5	104.967	0.681169	No	4.7	11.9	3.1	1.64	1.26734	0.42	No	No	No	No	1.89024	Moderate PAL	female	Drinks Alcohol 1-2 times/week	No	Yes	No	0.424332	3.7	3.2	No	108.181	4.6838	No	No	Yes	1.8	Secondary	Semi/Unskilled	15-17	No	No	No	2.47654	Yes
315	19	72.9	162.7	38.8	Yes	Yes	27.5393	25-29.99 kg/m.sq	110	77	80	109.2	0.732601	No	4.9	10	4	0.8	2.92477	0.6	No	No	No	No	5	Moderate PAL	female	Rarely Drinks Alcohol	No	No		0.491703	6.2	2.5	No	138.379	4.93	No	No	No		Primary/All Age	Skilled	10-14	No	No	No	2.30259	Yes
316	19	62.6	172.1	35.8	Yes	No	21.1355	18.5-24.99 kg/m.sq	103	53	80.9	97	0.834021	No	3.7	7.5	5	1.74	2.7233	1.17	No	No	No	No	2.87356	Moderate PAL	female	Rarely Drinks Alcohol	Yes	No	No	0.470076	8.2	24.5	No	158.64	5.06664	No	No	No		Primary/All Age	Skilled	0-9	No	Yes	No	2.0149	No
317	19	44.4	156.6	57.6	No	No	18.105	<18.5 kg/m.sq.	103	81	64	83.8	0.763723	Yes	4.7	7.1	6	1.54	4.23982	0.48	No	No	Yes	No	3.8961	Moderate PAL	female	Rarely Drinks Alcohol	No	Yes	No	0.408685	4	7.4	No	89.7188	4.49668	No	No	No	0.3	Tertiary	Skilled	10-14	No	No	No	1.96009	No
318	18	54.6	158.5		No		21.7337	18.5-24.99 kg/m.sq	104	60	64.9667	94.0333	0.69089								No	Yes				Moderate PAL	female	Rarely Drinks Alcohol		No	No	0.409884							No	Yes			Highly Skilled	15-17	No	No	No		No
319	19	58	167.5	45	No	Yes	20.6728	18.5-24.99 kg/m.sq	105	72	73.0667	92.8667	0.786791	No	4.4	7.9	3	1.01	1.80651	0.4	No	No	No	No	2.9703	Moderate PAL	female	Rarely Drinks Alcohol	No	No	Yes	0.436219	5	56.3	Yes	122.833	4.81083	Yes	Yes	No	9.55	Primary/All Age	Semi/Unskilled	0-9	No	No	No	2.06686	No
320	18	105.8	162.1	71.5	Yes	Yes	40.2643	>=30 kg/m.sq	107	71	113.833	121.733	0.935104	No	4.1	5.6	5.4	1.01	3.94505	0.97	No	No	Yes	No	5.34653	Low PAL	female	Never Drank Alcohol	Yes	No	No	0.702241	10.2	1.5	No	74.8154	4.31502	No	No			Secondary	Skilled	10-14	No	Yes	No	1.72277	No
321	18	62.1	164.6	59.8	No	Yes	22.9209	18.5-24.99 kg/m.sq	110	67	71.9	94	0.764894	No	4.2	6.9	4.5	0.92	3.41486	0.36	No	No	No	No	4.8913	Moderate PAL	female	Never Drank Alcohol	No	No	No	0.436817	6.9	4	No	90.8328	4.50902	No	No		0.6	Primary/All Age	Skilled	0-9	No	No	No	1.93152	No
322	19	63.4	176	76.3	No	Yes	20.4675	18.5-24.99 kg/m.sq	106	73	66.4667	92	0.722464	No	4.6	16.4	3.7	0.72	2.81486	0.36	No	No	No	No	5.13889	Low PAL	female	Drinks Alcohol 1-2 times/week	No	No	No	0.377652	7.5	12.8	No	76.1206	4.33232	No	No	No	1.35	Secondary	Skilled	10-14	No	No	No	2.79728	Yes
323	20	58.6	163.2		No	Yes	22.0018	18.5-24.99 kg/m.sq	90	60	73	98	0.744898	No		2	4.9	1.22	3.37266	0.67	No	No	No		4.01639	Low PAL	female	Rarely Drinks Alcohol	No	No	No	0.447304	6.4	18.1	No				No	No	2.15	Secondary	Skilled	10-14	No	No	No	0.693147	No
324	19	45.5	152.5	54.4	No	No	19.5646	18.5-24.99 kg/m.sq	105	79	65.6	92	0.713043	No	3.9	3.5	4.3	1.31	2.86615	0.27	No	No	No	No	3.28244	Low PAL	female	Rarely Drinks Alcohol	No	No	No	0.430164	6.1	15.4	No	92.5092	4.52731	No	No	No	1	Secondary	Skilled	10-14	No	No	No	1.25276	No
325	19	61	164.4		No		22.5697	18.5-24.99 kg/m.sq	103	55	68.5	94.6	0.724101		4.6	7.9	4.4			0.75	No	No	No	No		Low PAL	female	Rarely Drinks Alcohol	Yes	No	No	0.416667	8.6	7.2	No				No	No		Secondary	Highly Skilled	0-9	No	No	No	2.06686	No
326	18	43.6	159.5	56.8	No	Yes	17.1382	<18.5 kg/m.sq.	97	59	60.3	82.5667	0.730319	No	4.4	6.6	5.1	0.9	4.00734	0.42	No	No	No	No	5.66667	High PAL	female	Never Drank Alcohol	No	No		0.378056	5.6	9.1	No	92.6673	4.52902	No	No		0.3		Skilled	10-14	No	No	No	1.88707	No
327	19	74.6	166	73.1	No	Yes	27.0721	25-29.99 kg/m.sq	93	64	78.8	112.5	0.700444	No	4.3	7.5	3.6	1.16	2.3345	0.23	No	No	No	No	3.10345	Low PAL	female	Drinks Alcohol 1-2 times/week	No	No	Yes	0.474699	5.8	2.5	No	74.9384	4.31667	No	No	No	4.4	Secondary	Semi/Unskilled	0-9	No	No	No	2.0149	No
328	18	45.4	156.6	54.4	No	No	18.5128	18.5-24.99 kg/m.sq	97	63	65.4	83.2667	0.785428	Yes	4.4		7.6	1.53	5.84064	0.5	No	No	Yes	No	4.96732	Low PAL	female	Rarely Drinks Alcohol	No	No	No	0.417625	5.5	1.7	No	94.9963	4.55384	No	No	Yes	0.3	Primary/All Age	Skilled	0-9	No	No	No		No
329	18	56.8	170.3	71.5	No	Yes	19.5848	18.5-24.99 kg/m.sq	100	62	65.5333	92.5	0.708468	No	4.3	3.1	3.2	1.08	1.93193	0.41	No	No	No	No	2.96296	Moderate PAL	female	Rarely Drinks Alcohol	No	No	No	0.384811		4.5	No	78.6	4.36437	No	No	No		Secondary	Semi/Unskilled	0-9	No	No	No	1.1314	No
330	19	51.2	166	57.5	No	No	18.5803	18.5-24.99 kg/m.sq	91	61	65.2	89.9667	0.724713	No	4.9	10.1	5.9	1.56	3.84	1.09	No	No	Yes	No	3.78205	High PAL	female	Drinks Alcohol 1-2 times/week	Yes	No	No	0.392771	7.8	17.6	No	95.2696	4.55671	No	No	Yes	4	Tertiary	Highly Skilled	15-17	No	No	No	2.31254	Yes
331	18	68.6	162.5	30.4	Yes	No	25.9787	25-29.99 kg/m.sq	109	59	84.7	100.5	0.842786	No	4.2	7.3	4.5	1.33	2.84431	0.71	No	No	No	No	3.38346	Low PAL	female	Rarely Drinks Alcohol	No	No	No	0.521231	11.8	3	No	176.398	5.17274	No	No	No	4.1	Primary/All Age	Semi/Unskilled	10-14	No	No	No	1.98787	No
332	19	48.6	158.1	85.6	No	Yes	19.4434	18.5-24.99 kg/m.sq	109	77	61	85.3	0.715123	No	4	6.3	3.6	0.99	2.33018	0.61	No	No	No	No	3.63636	High PAL	female	Never Drank Alcohol	No	No	Yes	0.385832	3.7	4.4	No	60.9498	4.11005	No	No		0.3		Skilled	0-9	No	No	No	1.84055	No
333	19	42.3	160.5	54.4	No	No	16.4206	<18.5 kg/m.sq.	104	75	56.4333	82	0.688211	No	4.4	3.3	4.3	1.43	2.67275	0.43	No	No	No	No	3.00699	Moderate PAL	female	Rarely Drinks Alcohol	No	No	No	0.35161	4.8	52.1	Yes	97.3621	4.57844	Yes	No	No	0.55	Tertiary	Skilled	10-14	No	No	No	1.19392	No
334	19	64.5	161	60.6	No	Yes	24.8833	18.5-24.99 kg/m.sq	116	86	73	102.5	0.712195	No	4.8	6.3	5.5	1.2	4.07523	0.49	No	No	Yes	No	4.58333	Low PAL	female	Never Drank Alcohol	No	Yes	Yes	0.453416	4.9	2.5	No	87.6733	4.47362	No			1.3	Tertiary		10-14	No	No	No	1.84055	No
335	19	72.2	160		Yes		28.2031	25-29.99 kg/m.sq	105	78	88.1333	104.2	0.845809		4.6	2	4.2			0.32	No	No	No	No		Moderate PAL	female	Rarely Drinks Alcohol	No	No	Yes	0.550833	6.1	12.9	No				No	No	8.6	Secondary	Skilled	10-14	No	No	No	0.693147	No
336	19	55.4	157.4	45	No	No	22.3615	18.5-24.99 kg/m.sq	114	58	72.1	95	0.758947	No	4.1	2	5.5	1.42	3.89193	0.41	No	No	Yes	No	3.87324	Moderate PAL	female	Drinks Alcohol 1-2 times/week	No	No	Yes	0.458069	6.8	2.5	No	115.427	4.74864	No	No	No	0.3	Secondary	Skilled	0-9	No	No	No	0.693147	No
337	18	76.1	168.6	45.1	Yes	Yes	26.7713	25-29.99 kg/m.sq	111	67	86.0667	102.533	0.839402	No	4.2	23.5	3.2	0.83	2.2645	0.23	No	No	No	No	3.85542	Low PAL	female	Rarely Drinks Alcohol	No	No	Yes	0.510478	10.2	86.7	Yes	123.366	4.81515	Yes	No	No	0.9		Semi/Unskilled	10-14	No	No	No	3.157	Yes
338	19	38.8	157.3	32.7	No	Yes	15.681	<18.5 kg/m.sq.	128	50	62.6	75.5	0.829139	No	4.3	2	4	0.59	2.91	1.09	No	No	No	No	6.77966	High PAL	female	Rarely Drinks Alcohol	Yes	Yes	No	0.397966	11.7	3.3	No	158.743	5.06729	No	No	No	1.35	Secondary	Semi/Unskilled	10-14	No	No	No	0.693147	No
339	19	58.1	160.8	51.2	No	Yes	22.47	18.5-24.99 kg/m.sq	106	68	72.1667	95.3667	0.756728	Yes	4.5	14.5	6.3	1.23	4.47367	1.3	No	No	Yes	No	5.12195	Low PAL	female	Never Drank Alcohol	Yes	No	Yes	0.448798	5.5	29.2	No	103.641	4.64093	No	No		0.3	Secondary	Skilled	10-14	No	No	No	2.67415	Yes
340	19	75.6	170.7	70	Yes	Yes	25.9451	25-29.99 kg/m.sq	108	75	86	106.6	0.806754	No	4.1	7	4.1	0.69	3.17147	0.52	No	No	No	No	5.94203	Low PAL	female	Drinks Alcohol 1-2 times/week	No	No	No	0.503808	3.6	62.5	Yes	80.4729	4.38792	Yes	No	No	2.7	Primary/All Age	Semi/Unskilled	0-9	No	No	No	1.94591	No
341	19	64.3	157.5	56.8	No	No	25.9209	25-29.99 kg/m.sq	92	43	74.9667	99.8	0.751169	No	4.1		4.3	1.68	2.35395	0.58	No	No	No	No	2.55952	Low PAL	female	Rarely Drinks Alcohol	No	No	Yes	0.475979	5.2	6.3	No	91.5053	4.5164	No	No	No	0.65	Secondary	Skilled	10-14	No	No	No		No
342	19	62.3	167.4	66.9	No		22.2319	18.5-24.99 kg/m.sq	121	70	76.3	101.5	0.751724		5.4		5.6			0.85	No	No	Yes	Yes		Low PAL	female	Rarely Drinks Alcohol	Yes	Yes	No	0.455795				82.574	4.41369		No	No	1.3	Secondary	Semi/Unskilled	10-14	No	No	No		No
343	19	47.1	160.5	45	No	No	18.284	<18.5 kg/m.sq.	114	74	61.0667	86.8	0.703533	No	5.4	5.5	4.7	1.38	2.86587	0.99	No	No	No	Yes	3.4058	High PAL	female	Never Drank Alcohol	Yes	No	Yes	0.380478	6.5	16.5	No	117.7	4.76814	No	No		0.3	Tertiary	Skilled	10-14	No	No	No	1.70475	No
344	18	45.3	161.8	48	No	Yes	17.3038	<18.5 kg/m.sq.	102	79	58.3333	86.0667	0.677769	No	4.4	3.2	3.9	1.15	2.45642	0.64	No	No	No	No	3.3913	High PAL	female	Rarely Drinks Alcohol	No	No	No	0.360527	3.7	3.7	No	111.238	4.71167	No	No			Secondary	Skilled	10-14	No	No	No	1.16315	No
345	18	51.5	169.8	56.8	No	No	17.8621	<18.5 kg/m.sq.	106	72	66.2	82.1	0.806334	No	4.3	5.4	3.3	1.45	1.71697	0.29	No	No	No	No	2.27586	Low PAL	female	Drinks Alcohol 3 or more times/week	No	No	No	0.38987	5.3	0.9	No	98.6514	4.59159	No	No	Yes	0.3	Tertiary	Highly Skilled	10-14	No	No	No	1.6864	No
346	19	47.4	161.6	70	No	No	18.1508	<18.5 kg/m.sq.	107	73	61.5	87.5	0.702857	No	5.2	2.1	4.9	1.68	3.05945	0.35	No	No	No	Yes	2.91667	Low PAL	female	Rarely Drinks Alcohol	No	No	No	0.380569	5.3	2.5	No	76.1829	4.33314	No	No	No	0.3	Secondary	Highly Skilled	15-17	No	No	No	0.741937	No
347	19	50.8	170.2	66.9	No	No	17.5366	<18.5 kg/m.sq.	102	69	61.5333	88.5	0.695292	No	4.3	2	5.9	1.97	3.65477	0.6	No	No	Yes	No	2.99492	Low PAL	female	Rarely Drinks Alcohol	No	No		0.361535	6.4	2.5	No	83.9552	4.43028	No	No	No	0.3	Primary/All Age		10-14	No	No	No	0.693147	No
348	19	59.9	176.9	48.1	No	Yes	19.1413	18.5-24.99 kg/m.sq	115	89	70.9667	92.6333	0.766103	Yes	4.8	5.1	5.8	1.19	4.1467	1.01	No	No	Yes	No	4.87395	Moderate PAL	female	Drinks Alcohol 1-2 times/week	Yes	Yes	No	0.401168	6.2	8	No	121.366	4.79881	No	No	No	1.4	Secondary	Skilled	0-9	No	No	No	1.62924	No
349	19	51.1	173.8	60.7	No	Yes	16.9169	<18.5 kg/m.sq.	91	64	66	86.3667	0.764184	No	3.8	2.5	3.6	1.08	2.40532	0.25	No	No	No	No	3.33333	Low PAL	female	Rarely Drinks Alcohol	No	No		0.379747	7.6	2.5	No	94.4876	4.54847	No	No	No	0.3	Secondary	Skilled	10-14	No	No	No	0.916291	No
350	19	52.8	162.5	73.1	No	No	19.9953	18.5-24.99 kg/m.sq	112	71	63.8	90.7333	0.703159	Yes	4.8		6.9	1.74	4.88018	0.61	No	No	Yes	No	3.96552	Low PAL	female	Rarely Drinks Alcohol	No	No	No	0.392615	6.6	10.3	No	73.3584	4.29536	No	No	Yes	1.45	Secondary	Skilled	10-14	No	No	No		No
352	19	49.1	159.4	57.6	No	Yes	19.3243	18.5-24.99 kg/m.sq	110	65	65.1	87.6	0.743151	No	4.6	10.7	3.7	1.16	2.37028	0.37	No	No	No	No	3.18966	Low PAL	female	Drinks Alcohol 1-2 times/week	No	No	Yes	0.408407	7.1	4.5	No	91.3229	4.5144	No	No	No	0.3	Tertiary	Highly Skilled	10-14	No	No	No	2.37024	Yes
353	20	64.6	146.4	51.4	Yes	Yes	30.1405	>=30 kg/m.sq	102	69	82.5333	102.167	0.80783	No	4.4	4.7	4.9	1.19	3.47147	0.52	No	No	No	No	4.11765	Low PAL	female	Drinks Alcohol 3 or more times/week	No	No		0.563752	5.7	2.5	No	93.9922	4.54321	No	No	No	2.1	Primary/All Age	Semi/Unskilled	0-9	No	No	No	1.54756	No
354	18	47	151.3	48	No	No	20.5315	18.5-24.99 kg/m.sq	107	79	65.5	86.6	0.756351	No	4.8	2.9	5.2	1.68	3.25394	0.58	No	No	No	No	3.09524	High PAL	female	Drinks Alcohol 3 or more times/week	No	No	No	0.432915	7.6	16.7	No	104.019	4.64457	No	No	Yes	2.75	Secondary	Highly Skilled	0-9	No	No	No	1.06471	No
355	18	62.7	161.6	53.9	No	Yes	24.0096	18.5-24.99 kg/m.sq	108	63	70.1	100.6	0.696819	No	4.5	11.5	4	1.06	2.71982	0.48	No	No	No	No	3.77359	Low PAL	female	Rarely Drinks Alcohol	No	No	No	0.433787	6.2	1.3	No	98.9388	4.5945	No	No	No	1.8	Secondary	Skilled	15-17	No	No	No	2.44235	Yes
356	19	68.4	160	38.9	No	No	26.7188	25-29.99 kg/m.sq	107	74	78.4333	101.467	0.772996	No	4.2	15.9	3.7	1.45	1.93807	0.68	No	No	No	No	2.55172	Moderate PAL	female	Rarely Drinks Alcohol	No	No		0.490208	12.2			135.733	4.91069		No	No	1.45	Tertiary	Semi/Unskilled	10-14	No	No	No	2.76632	Yes
357	18	61.1	172.3	83.3	No	Yes	20.5812	18.5-24.99 kg/m.sq	110	74	68.2	89.3	0.763718	No	4.4	3.8	5.1	1.09	3.65679	0.77	No	No	No	No	4.6789	Low PAL	female	Drinks Alcohol 1-2 times/week	Yes	No	Yes	0.395821	8.1	12.9	No	68.2581	4.2233	No	No	No	2.4	Secondary	Semi/Unskilled	0-9	No	No	No	1.335	No
358	18	56.7	164.8	39.2	No	No	20.877	18.5-24.99 kg/m.sq	106	59	68.4	88	0.777273	No	4.1	5.7	5.3	1.81	3.16431	0.71	No	No	Yes	No	2.92818	Moderate PAL	female	Rarely Drinks Alcohol	No	No	No	0.415049	6	9.6	No	138.735	4.93256	No	No	No	0.4	Tertiary	Highly Skilled	15-17	No	No	No	1.74047	No
359	20	66.9	163.5	66.9	No	Yes	25.026	25-29.99 kg/m.sq	110	71	78	103.2	0.755814	No	4	2	3.5	1.14	2.22697	0.29	No	No	No	No	3.07018	Moderate PAL	female	Drinks Alcohol 3 or more times/week	No	No	No	0.477064	5.1	3.4	No	80.6502	4.39012	No	No	Yes	2.05	Secondary	Highly Skilled	10-14	No	No	No	0.693147	No
360	19	44.5	156.7	45	No	No	18.1227	<18.5 kg/m.sq.	91	52	64.4333	83.0667	0.775682	No	4	2	4.7	1.46	3.07486	0.36	No	No	No	No	3.21918	Low PAL	female	Rarely Drinks Alcohol	No	No	No	0.411189	7	2.5	No	114.913	4.74418	No	No	No	0.45	Primary/All Age	Semi/Unskilled	0-9	No	No	No	0.693147	No
361	19	42.1	154.4	57.6	No	Yes	17.6599	<18.5 kg/m.sq.	101	71	59.9333	81.0333	0.739613	No	3.8	5.3	3.7	0.86	2.66569	0.38	No	No	No	No	4.30233	Moderate PAL	female	Drinks Alcohol 1-2 times/week	No	No	No	0.388169	2.9	3.2	No	88.4583	4.48253	No	No	No	2.2	Secondary	Semi/Unskilled	10-14	No	No	No	1.66771	No
362	18	53.8	171.1	53.9	No	No	18.3773	<18.5 kg/m.sq.	105	73	63.8667	90.8667	0.702861	No	4		3.7	1.76	1.73817	0.44	No	No	No	No	2.10227	Moderate PAL	female	Rarely Drinks Alcohol	No	No	No	0.373271	3.4	13.5	No	104.755	4.65163	No	No	No	0.35	Secondary	Semi/Unskilled	10-14	No	No	No		No
363	18	65.6	161.2	50.9	No	No	25.2449	25-29.99 kg/m.sq	102	58	78.6	100.5	0.78209	No	4.3	9.7	4.2	1.43	2.52229	0.54	No	No	No	No	2.93706	Low PAL	female	Rarely Drinks Alcohol	No	No	No	0.487593	4.5	1.5	No	104.511	4.64929	No	No	No	0.9	Secondary	Semi/Unskilled	0-9	No	No	No	2.27213	No
364	19	62.2	162.5	88.7	No	No	23.555	18.5-24.99 kg/m.sq	108	59	69.4333	99.0333	0.701111	No	3.9	2	5.1	1.61	3.18725	0.66	No	No	No	No	3.1677	Moderate PAL	female	Rarely Drinks Alcohol	No	No	No	0.427282	3.8	2.5	No	60.4566	4.10193	No	No	No	9.05	Secondary	Skilled	10-14	No	No	No	0.693147	No
365	18	40.8	160	45.1	No	No	15.9375	<18.5 kg/m.sq.	94	56	61.6	80.5	0.765217	Yes	4.3	5.9	6.7	1.96	4.43266	0.67	No	No	Yes	No	3.41837	Low PAL	female	Rarely Drinks Alcohol	No	No	No	0.385	5.5	1.8	No	117.073	4.7628	No	No	No		Secondary	Highly Skilled	0-9	No	No	No	1.77495	No
366	19	62.3	171.3	54.4	No	Yes	21.2311	18.5-24.99 kg/m.sq	107	80	68.6667	98.4667	0.69736	No	4.5	4.7	4.5	1.23	2.88009	0.85	No	No	No	No	3.65854	Low PAL	female	Never Drank Alcohol	Yes	Yes		0.400856	6.9	14.8	No	103.914	4.64356	No	No		4.55	Secondary	Skilled	10-14	No	No	No	1.54756	No
367	20	60.1	164.5	66.9	No	Yes	22.2097	18.5-24.99 kg/m.sq	98	58	77.5	96.9667	0.799244	No	4.9	7.1	3.3	1.22	1.91028	0.37	No	Yes	No	No	2.70492	Low PAL	female	Drinks Alcohol 3 or more times/week	No	No	Yes	0.471125	11.7	15.2	No	81.1435	4.39622	No	No	Yes	8.2		Skilled	10-14	No	No	No	1.96009	No
368	19	106	162.5	42	Yes	Yes	40.142	>=30 kg/m.sq	120	72	118.5	124.567	0.951298	No	4.1	10.7	4.8	1.16	3.18128	1	No	No	No	No	4.13793	Low PAL	female	Rarely Drinks Alcohol	Yes	Yes	Yes	0.729231	7.9	6.2	No	127.679	4.84952	No	No	No		Tertiary	Skilled	10-14	No	Yes	No	2.37024	Yes
369	20	61	171.5	54.5	No	Yes	20.7397	18.5-24.99 kg/m.sq	115	83	68.9	93	0.74086	No	4.5	2.9	3.6	1.05	2.32064	0.5	No	No	No	No	3.42857	High PAL	female	Drinks Alcohol 1-2 times/week	No	Yes	Yes	0.401749	4.8	7.6	No	103.844	4.64289	No	No	No	0.4	Tertiary	Skilled	10-14	No	No	No	1.06471	No
370	19	44.3	160.4	38.9	No	No	17.2185	<18.5 kg/m.sq.	111	59	59.9333	82.4667	0.726758	No	4.2	5.5	3.1	1.32	1.61028	0.37	No	No	No	No	2.34848	Low PAL	female	Rarely Drinks Alcohol	No	No	Yes	0.373649	6.7	3.6	No	136.072	4.91318	No	No	No	0.6	Tertiary	Highly Skilled	15-17	No	No	No	1.70475	No
371	20	53.9	174		No	No	17.8029	<18.5 kg/m.sq.	97	77	60.6333	88.6333	0.684092	Yes	4.8	2	6.2	1.73	4.30027	0.37	No	No	Yes	No	3.58381	Moderate PAL	female	Rarely Drinks Alcohol	No	No	No	0.348467	5.2	6.6	No				No	No	0.8	Secondary	Skilled	0-9	No	No	No	0.693147	No
372	19	50.4	159.6		No	Yes	19.7863	18.5-24.99 kg/m.sq	114	62	66.1	93.5667	0.706448	No	3.7	2.1	3.8	1.24	2.38569	0.38	No	No	No	No	3.06452	Low PAL	female	Rarely Drinks Alcohol	No	No	No	0.41416	11.6	9.3	No				No	No	3.2	Primary/All Age	Semi/Unskilled	10-14	No	No	No	0.741937	No
373	19	62.3	173.4	62.7	No	No	20.72	18.5-24.99 kg/m.sq	107	67	72.7667	95.2667	0.763821	No	4.7		4.1	1.4	2.56239	0.3	No	No	No	No	2.92857	Low PAL	female	Never Drank Alcohol	No	No	Yes	0.419646	6.3	1.2	No	91.2632	4.51375	No	No		0.8	Secondary	Highly Skilled	10-14	No	No	No		No
374	19	55.1	158.4	54.4	No	Yes	21.9605	18.5-24.99 kg/m.sq	94	61	70.3667	91.6	0.768195	Yes	4.4	7.8	5.7	1.09	4.38064	0.5	No	No	Yes	No	5.22936	Low PAL	female	Rarely Drinks Alcohol	No	No	Yes	0.444234	8.6	3.4	No	96.0882	4.56527	No	No	No	1.65	Tertiary	Highly Skilled	15-17	No	No	No	2.05412	No
375	18	47.4	148.8	48	No	Yes	21.4078	18.5-24.99 kg/m.sq	103	42	67.6333	88.1667	0.767108	No	4.6	8.4	4.6	0.96	3.36477	0.6	No	No	No	No	4.79167	Low PAL	female	Drinks Alcohol 3 or more times/week	No	No	Yes	0.454525	5.2	4.2	No	102.3	4.62791	No	No	No	0.7	Tertiary	Semi/Unskilled	0-9	No	No	No	2.12823	No
376	18	75.8	166.9	62.7	Yes	Yes	27.2118	25-29.99 kg/m.sq	113	80	82.4667	105.767	0.779704	No	4.8		4.7	1.16	3.20972	0.72	No	Yes	No	No	4.05172	Low PAL	female	Drinks Alcohol 1-2 times/week	No	Yes	Yes	0.494108	7.5	15	No	87.8421	4.47554	No	No	No			Semi/Unskilled	10-14	No	No	No		No
377	18	53.8	160.9	59.8	No	Yes	20.7812	18.5-24.99 kg/m.sq	91	56	68.9667	88.2	0.781935	Yes	4.5	2.5	5.3	0.72	4.15798	0.92	No	No	Yes	No	7.36111	Low PAL	female	Rarely Drinks Alcohol	Yes	No		0.428631	3.8	1.4	No	88.791	4.48628	No	No	No	2.3	Secondary	Skilled	0-9	No	No	No	0.916291	No
378	19	67.3	183	45	No	Yes	20.0962	18.5-24.99 kg/m.sq	118	83	74.2667	96.8	0.767218	No	4.2	2	3.6	0.8	2.48349	0.69	No	Yes	No	No	4.5	Moderate PAL	female	Drinks Alcohol 1-2 times/week	No	Yes	No	0.405829	3.6	16.2	No	134.2	4.89933	No	Yes	Yes	2.1	Secondary	Skilled	10-14	No	No	No	0.693147	No
379	19	59.6	161.4	23.3	No	Yes	22.8791	18.5-24.99 kg/m.sq	113	58	72.5667	94.5333	0.76763	Yes	4.2	4.8	6.5	1.08	5.00257	0.91	No	No	Yes	No	6.01852	Low PAL	female	Drinks Alcohol 3 or more times/week	Yes	No	Yes	0.449608	4.2	16.5	No	228.592	5.43194	No	Yes	No	0.3	Primary/All Age	Highly Skilled	0-9	No	No	No	1.56862	No
380	19	63.6	160.8	48.2	Yes	No	24.5972	18.5-24.99 kg/m.sq	111	70	85.7	96.7333	0.885941	No	4.6	6	4	1.33	2.32596	0.75	No	No	No	No	3.00752	Moderate PAL	female	Never Drank Alcohol	Yes	No	No	0.53296	5.7	34.1	Yes	110.091	4.70131	Yes	No		4	Secondary	Semi/Unskilled	0-9	No	Yes	No	1.79176	No
381	19	58.6	171.5	91.8	No	No	19.9237	18.5-24.99 kg/m.sq	110	63	67.2667	97.2	0.692044	No	4.5	3.8	3.8	1.67	1.89606	0.51	No	No	No	No	2.27545	Low PAL	female	Rarely Drinks Alcohol	No	No	No	0.392225	8.2	6	No	61.6503	4.12148	No	No	No	0.7		Skilled	10-14	No	No	No	1.335	No
382	19	44.8	156.2	45.2	No	No	18.3618	<18.5 kg/m.sq.	106	74	61.5	87.3	0.704467	No	4.8	6.4	4	1.42	2.45615	0.27	No	No	No	No	2.8169	Low PAL	female	Drinks Alcohol 1-2 times/week	No	No	No	0.393726	4.3	6.4	No	114.04	4.73655	No	No	No	0.3	Secondary	Skilled	10-14	No	No	No	1.8563	No
383	20	66.1	174.8	70	No	Yes	21.6331	18.5-24.99 kg/m.sq	116	67	76	97.5	0.779487	No	4.6	2.7	3.6	1.26	2.17486	0.36	No	No	No	No	2.85714	Moderate PAL	female	Drinks Alcohol 1-2 times/week	No	No	No	0.434783	4.4			82.4057	4.41165		No	No	0.3	Tertiary	Highly Skilled	15-17	No	No	No	0.993252	No
384	20	49.3	162.1	54.5	No	No	18.7621	18.5-24.99 kg/m.sq	113	86	64.6333	87.4667	0.738948	No	4.7	4.6	5	1.63	3.01679	0.77	No	No	No	No	3.06748	Moderate PAL	female	Rarely Drinks Alcohol	Yes	Yes	No	0.398725	4.5	2.5	No	98.1523	4.58652	No	No	No	0.3	Tertiary	Skilled	10-14	No	No	No	1.52606	No
385	19	63.9	165.1	63.7	No	No	23.4426	18.5-24.99 kg/m.sq	101	71	69.3667	101.367	0.684314	No	4.7	8	3.4	1.47	1.80615	0.27	No	No	No	No	2.31293	Moderate PAL	female	Drinks Alcohol 1-2 times/week	No	No		0.420149	8.7	2.5	No	85.5306	4.44887	No	No	No	0.3	Tertiary	Highly Skilled	15-17	No	No	No	2.07944	No
386	20	83.4	178.1	54.5	Yes	No	26.2929	25-29.99 kg/m.sq	99	30	97.5667	106.633	0.914973	No	3.9	2	6.2	1.53	4.08284	1.28	No	No	Yes	No	4.05229	Low PAL	female	Rarely Drinks Alcohol	Yes	No	Yes	0.54782	12.2	3.1	No	107.84	4.68065	No	No	No		Secondary	Skilled	0-9	No	Yes	No	0.693147	No
387	18	107.9	172		Yes		36.4724	>=30 kg/m.sq	102	55	105.6	114.633	0.921198		4.7	19.7	5.8			1.07	No	No	Yes	No		Low PAL	female	Drinks Alcohol 3 or more times/week	Yes	No	Yes	0.613953	5.5	1.5	No				No	No		Secondary	Highly Skilled	10-14	No	Yes	No	2.98062	Yes
388	19	59.3	166.8	88.7	No	Yes	21.3139	18.5-24.99 kg/m.sq	97	67	69.1	96.0333	0.719542	No	4.8	4.7	3.8	1.28	2.35486	0.36	No	No	No	No	2.96875	Low PAL	female	Never Drank Alcohol	No	No		0.414269	3.8	2.5	No	62.0564	4.12804	No	No		0.9	Tertiary	Highly Skilled	0-9	No	No	No	1.54756	No
389	19	105.1	172.1	56.8	Yes	Yes	35.4847	>=30 kg/m.sq	118	75	107.3	119.133	0.900672	Yes	4.6		6.9	1.13	5.52229	0.54	No	No	Yes	No	6.10619	Low PAL	female	Rarely Drinks Alcohol	No	No	Yes	0.623475	9.4	2.2	No	99.9877	4.60505	No	No	No		Primary/All Age	Semi/Unskilled	0-9	No	No	No		No
390	19	51.9	166.5	63.7	No	No	18.7214	18.5-24.99 kg/m.sq	94	57	63.7667	90.5667	0.704085	No	4.7	4.1	4.2	1.45	2.52523	0.49	No	No	No	No	2.89655	Low PAL	female	Drinks Alcohol 3 or more times/week	No	No	No	0.382983	5.5	1.5	No	86.2559	4.45732	No	No	No	0.3	Secondary	Highly Skilled	15-17	No	No	No	1.41099	No
391	18	47.6	169.6	62.7	No	Yes	16.5484	<18.5 kg/m.sq.	98	49	60.8	82.8	0.734299	No	4.3	6.9	4.2	0.88	2.93468	0.84	No	No	No	No	4.77273	Moderate PAL	female	Drinks Alcohol 1-2 times/week	Yes	No	No	0.358491	6.6	1.8	No	89.2632	4.49159	No	No	No	8.7	Secondary	Semi/Unskilled	0-9	No	No	No	1.93152	No
392	18	49.3	167.7	59.8	No	Yes	17.53	<18.5 kg/m.sq.	114	63	63.0667	88.3667	0.713693	No	4.7	5.8	4.4	1.04	3.19028	0.37	No	No	No	No	4.23077	Low PAL	female	Drinks Alcohol 3 or more times/week	No	No	No	0.376068	5.9	1.5	No	92.5435	4.52768	No	No	No	0.3	Tertiary	Highly Skilled	15-17	No	No	No	1.75786	No
393	18	83.5	169.8	65.6	Yes	Yes	28.9608	25-29.99 kg/m.sq	100	69	91.5	110.333	0.829305	No	4.4	14.4	5.1	0.92	3.93229	0.54	No	No	No	No	5.54348	Low PAL	female	Rarely Drinks Alcohol	No	No	Yes	0.538869	5.2	1	No	85.4177	4.44755	No	No	No	1	Tertiary	Semi/Unskilled	0-9	No	No	No	2.66723	Yes
394	18	41.1	165.7	30.4	No	No	14.9691	<18.5 kg/m.sq.	111	62	60.3333	83.2	0.72516	Yes	4.2	5.5	6.5	1.76	4.40514	0.73	No	No	Yes	No	3.69318	Low PAL	female	Rarely Drinks Alcohol	No	No	Yes	0.364112	14.9	8.4	No	179.872	5.19224	No	No	No	0.3		Skilled	0-9	No	No	No	1.70475	No
395	18	46.5	158.3	65.6	No	Yes	18.5563	18.5-24.99 kg/m.sq	94	60	62.1333	82.8	0.750403	No	4.8	14.7	4.5	1.2	3.13486	0.36	No	No	No	No	3.75	Low PAL	female	Drinks Alcohol 1-2 times/week	No	No	No	0.392504	4.8	7	No	79.6326	4.37742	No	No	No	0.3	Primary/All Age	Semi/Unskilled	0-9	No	No	No	2.68785	Yes
396	19	83.2	173.2	56.8	Yes	Yes	27.735	25-29.99 kg/m.sq	100	68	82.6333	110.733	0.746237	Yes	4.3		6.5	1.27	5.00064	0.5	No	No	Yes	No	5.11811	Low PAL	female	Rarely Drinks Alcohol	No	No	Yes	0.477098	7.9	3.8	No	100.627	4.61142	No	No	No	1.1	Tertiary	Skilled	10-14	No	No	No		No
397	19	45.8	152.7	53.9	No	Yes	19.6421	18.5-24.99 kg/m.sq	109	65	63.2333	87.6333	0.721567	Yes	3.8	4.3	5.6	1.18	4.22275	0.43	No	No	Yes	No	4.74576	High PAL	female	Drinks Alcohol 3 or more times/week	No	No	Yes	0.414102	9.4	1.1	No	93.4898	4.53785	No	No	No	0.3	Primary/All Age	Skilled	0-9	No	No	No	1.45862	No
398	19	51.4	164.8	51.4	No	Yes	18.9256	18.5-24.99 kg/m.sq	100	73	65.2	86	0.758139	No	4.8	2	3.7	1.06	2.47945	0.35	No	No	No	No	3.49057	Moderate PAL	female		No	No	No	0.395631	9.4	28.6	No	105.805	4.6616	No	Yes	No	0.3	Secondary	Skilled	10-14	No	No	No	0.693147	No
399	19	116.5	174.5	70	Yes	Yes	38.2591	>=30 kg/m.sq	120	57	119.5	124.2	0.962158	No	4.6	2	2.9	0.9	1.86239	0.3	No	No	No	No	3.22222	Low PAL	female	Rarely Drinks Alcohol	No	Yes	Yes	0.684814	7.1	80	Yes	82.2643	4.40994	Yes	No	Yes	8.3	Primary/All Age	Skilled	10-14	No	No	No	0.693147	No
400	19	58.6	159.5	57.5	No	No	23.0344	18.5-24.99 kg/m.sq	106	58	76.9667	95	0.810175	No	4.4	3.7	4.1	1.32	2.51394	0.58	No	No	No	No	3.10606	Moderate PAL	female	Never Drank Alcohol	No	No	Yes	0.48255	5.3	2.5	No	91.5391	4.51677	No	No		0.5	Secondary	Skilled	10-14	No	No	No	1.30833	No
401	18	73.5	167.7	83.3	Yes	Yes	26.1349	25-29.99 kg/m.sq	112	68	81	106.2	0.762712	No	4.7	16.7	3.1	1.06	1.89321	0.32	No	No	No	No	2.92453	Moderate PAL	female	Rarely Drinks Alcohol	No	No	Yes	0.483005	5	5.6	No	66.4358	4.19624	No	No	No	5.75	Secondary	Skilled	15-17	No	No	No	2.81541	Yes
402	20	54.8	177.1	79.4	No	No	17.472	<18.5 kg/m.sq.	106	84	62.8	91.8333	0.683848	No	4.6	2.6	5.1	1.45	3.42064	0.5	No	No	No	No	3.51724	Moderate PAL	female	Drinks Alcohol 3 or more times/week	No	Yes	Yes	0.354602	3.9	5.3	No	73.6058	4.29872	No	No	No	0.3	Tertiary	Highly Skilled	10-14	No	No	No	0.955511	No
403	19	49.1	155.4	57.5	No	No	20.332	18.5-24.99 kg/m.sq	97	60	64.8333	89.0667	0.727919	No	4	3.1	3.6	1.44	1.99945	0.35	No	No	No	No	2.5	Moderate PAL	female	Rarely Drinks Alcohol	No	No	No	0.417203	3.2	4.1	No	89.1861	4.49073	No	No	No	0.3	Primary/All Age	Skilled	0-9	No	No	No	1.1314	No
404	19	79.5	176	38.8	Yes	Yes	25.665	25-29.99 kg/m.sq	105	61	83.3667	108.9	0.765534	No	5	8.9	3.7	0.93	2.65991	0.24	No	No	No	Yes	3.97849	Low PAL	female	Drinks Alcohol 3 or more times/week	No	No	Yes	0.473674	5.4	30.1	Yes	149.691	5.00857	Yes	Yes	Yes	7.9	Secondary		10-14	Yes	No	No	2.18605	No
405	19	64.3	165.1	54.5	Yes	Yes	23.5894	18.5-24.99 kg/m.sq	102	70	81.1	98.5	0.82335	No	4.4	3.9	3.6	0.42	2.44147	1.61	No	No	No	No	8.57143	Low PAL	female	Rarely Drinks Alcohol	Yes	No	Yes	0.491217	3.2	7	No	99.9688	4.60486	No	No	No		Secondary	Semi/Unskilled	0-9	No	Yes	No	1.36098	No
406	19	60.8	165.8	91.8	No	Yes	22.1174	18.5-24.99 kg/m.sq	115	74	74.8	93.9	0.796592	Yes	5.1	11.2	5.3	0.96	4.13358	0.45	No	No	Yes	Yes	5.52083	Low PAL	female	Drinks Alcohol 1-2 times/week	No	No	No	0.451146	3.5	2.5	No	59.6013	4.08768	Yes	No	No	0.3	Secondary	Skilled	0-9	No	No	No	2.41591	Yes
407	19	62.4	164.4	48.2	No	Yes	23.0877	18.5-24.99 kg/m.sq	93	63	68.8	97.1333	0.708305	No	4.9	7.2	3.8	0.97	2.66486	0.36	No	No	No	No	3.91753	Moderate PAL	female	Rarely Drinks Alcohol	No	No	No	0.418492	7.8	3.4	No	112.556	4.72345	No	No	No	1.9	Secondary	Skilled	10-14	No	No	No	1.97408	No
408	18	54.7	173.7	50.9	No	Yes	18.1296	<18.5 kg/m.sq.	95	54	65.4667	88.2667	0.741692	No	3.8	6.9	4	1.26	2.53817	0.44	No	No	No	No	3.1746	Low PAL	female	Rarely Drinks Alcohol	No	No	No	0.376895	4.7	39.1	Yes	112.615	4.72397	Yes	No	No		Primary/All Age	Semi/Unskilled	10-14	No	No	No	1.93152	No
410	19	50.7	159.5	85.6	No	Yes	19.9291	18.5-24.99 kg/m.sq	98	75	63.7	87.6667	0.726616	No	4	2.5	3.7	0.89	2.62193	0.41	No	No	No	No	4.1573	Moderate PAL	female	Rarely Drinks Alcohol	No	No		0.399373	6.2	10	No	61.4895	4.11887	No	No	No	1.45	Tertiary	Highly Skilled	10-14	No	No	No	0.916291	No
411	18	63.6	167.7	50.9	No	Yes	22.6147	18.5-24.99 kg/m.sq	111	68	75.5	97.2	0.776749	No	4.1	11.7	3.6	1.23	2.18651	0.4	No	No	No	No	2.92683	Moderate PAL	female	Rarely Drinks Alcohol	No	No	No	0.450209	8.3	3.6	No	108.725	4.68882	No	No	No	5.75	Secondary	Semi/Unskilled	0-9	No	No	No	2.45959	Yes
412	18	46	157.8	42.1	No	Yes	18.4733	<18.5 kg/m.sq.	94	60	61.7	82.9	0.74427	No	4.4	3.5	3.2	1.02	1.9644	0.47	No	No	No	No	3.13725	Moderate PAL	female	Drinks Alcohol 3 or more times/week	No	No	No	0.391001	6	7.8	No	123.691	4.81779	No	No	No	0.3	Secondary	Semi/Unskilled	10-14	No	No	No	1.25276	No
413	19	51.5	157.4	54.5	No	Yes	20.7873	18.5-24.99 kg/m.sq	112	71	69.0333	88.8333	0.777111	No	4.3	7.7	3.8	1.28	2.20807	0.68	No	No	No	No	2.96875	Low PAL	female	Drinks Alcohol 1-2 times/week	No	No	No	0.438585	8.3	2.7	No	95.3064	4.5571	No	No	No	0.95	Primary/All Age	Skilled	0-9	No	No	No	2.04122	No
414	19	57.3	162.1	20	No	Yes	21.8066	18.5-24.99 kg/m.sq	107	70	72.4	94.2667	0.768034	No	4.7	2.7	3.8	0.96	2.70697	0.29	No	No	No	No	3.95833	Low PAL	female	Drinks Alcohol 1-2 times/week	No	No		0.446638	5.7	12.2	No	267.465	5.58899	No	Yes	No	0.4	Secondary	Skilled	10-14	No	No	No	0.993252	No
415	19	71.6	172.6	60.6	No	Yes	24.0343	18.5-24.99 kg/m.sq	124	78	74.4667	102.233	0.728399	No	4.6		4.1	0.95	2.84266	0.67	No	No	No	No	4.31579	Moderate PAL	female	Never Drank Alcohol	No	Yes	Yes	0.431441	5.4	20.8	No	93.9901	4.54319	No	No		3.5	Secondary	Semi/Unskilled	10-14	No	No	No		No
416	19	48.6	158.3	48.2	No	Yes	19.3943	18.5-24.99 kg/m.sq	115	60	67.3	87.5	0.769143	No	4.4	5	3.9	1.15	2.59404	0.34	No	No	No	No	3.3913	Low PAL	female	Rarely Drinks Alcohol	No	No	No	0.425142	8.4	12.5	No	108.38	4.68564	No	No	Yes		Tertiary	Highly Skilled	15-17	No	No	No	1.60944	No
417	19	75.7	161.4	26.3	Yes	Yes	29.0595	25-29.99 kg/m.sq	119	89	86.0667	103.933	0.828095	No	4.9		5.4	0.88	3.67596	1.84	No	No	Yes	No	6.13636	Low PAL	female	Rarely Drinks Alcohol	Yes	Yes	No	0.533251	4.4	49.7	Yes	202.517	5.31082	Yes	No	No	4.7	Secondary	Highly Skilled	10-14	No	Yes	No		No
418	18	76	170.6	65.6	No	Yes	26.1129	25-29.99 kg/m.sq	102	68	76	100.7	0.754717	No	4.7	4.4	4.5	1.01	3.22394	0.58	No	No	No	No	4.45545	Low PAL	female	Drinks Alcohol 1-2 times/week	No	No	Yes	0.445487	3.6	1	No	85.8201	4.45225	No	No	No	0.7	Primary/All Age	Skilled	10-14	No	No	No	1.4816	No
419	19	43.8	158.2	42	No	Yes	17.5009	<18.5 kg/m.sq.	107	66	65.3	83	0.786747	No	4.8	3.2	4.2	1.05	2.70963	0.96	No	No	No	No	4	Low PAL	female	Drinks Alcohol 3 or more times/week	Yes	No	Yes	0.412769	7	2.5	No	124.3	4.8227	No	No	Yes	0.4	Secondary	Skilled	10-14	No	No	No	1.16315	No
420	18	69.2	170	59.8	No	Yes	23.9446	18.5-24.99 kg/m.sq	96	77	76.2	99.5	0.765829	No	4.5	6.3	3.8	0.84	2.84991	0.24	No	No	No	No	4.52381	Low PAL	female	Drinks Alcohol 3 or more times/week	No	No		0.448235	6.5	8	No	93.8127	4.5413	No	No	Yes	3.15	Tertiary	Highly Skilled	15-17	No	No	No	1.84055	No
421	18	72.4	169.8	48	No	No	25.111	25-29.99 kg/m.sq	119	74	79.3	100.9	0.785927	No	4.7	8.9	3.9	1.45	2.24358	0.45	No	No	No	No	2.68966	Low PAL	female	Drinks Alcohol 1-2 times/week	No	No		0.46702	5.7	3.8	No	116.738	4.75993	No	No	No		Tertiary	Highly Skilled	10-14	No	No	No	2.18605	No
422	19	49.7	158.3	88.7	No	No	19.8333	18.5-24.99 kg/m.sq	100	64	65	85.5	0.760234	No	4.4	10.5	4.7	1.6	2.86605	0.51	No	No	No	No	2.9375	Low PAL	female	Drinks Alcohol 1-2 times/week	No	No	No	0.410613	5.9	6.3	No	58.894	4.07574	Yes	No	No	0.3	Secondary	Highly Skilled	10-14	No	No	No	2.35138	Yes
423	18	105.3	168.7	65.6	Yes	Yes	36.9997	>=30 kg/m.sq	113	70	104	127.4	0.816326	No	4.7	9.2	4	1.11	2.5322	0.78	No	No	No	No	3.6036	Low PAL	female	Never Drank Alcohol	Yes	No		0.616479	5.5	3.9	No	84.8643	4.44105	No	No		5.3	Secondary	Semi/Unskilled	10-14	No	Yes	No	2.2192	No
424	19	48.9	146.5	48.2	No	Yes	22.7842	18.5-24.99 kg/m.sq	110	61	70.4	87.9	0.80091	Yes	5	3.7	6.3	1.07	4.95477	0.6	No	No	Yes	Yes	5.88785	Moderate PAL	female	Rarely Drinks Alcohol	No	No	No	0.480546	6.1	6.2	No	100.301	4.60817	No	No	No	1.1	Secondary	Skilled	10-14	No	No	No	1.30833	No
425	19	79.8	163.7	41.9	Yes	Yes	29.7787	25-29.99 kg/m.sq	108	77	89.1	113	0.788496	No		16.5	3.2	0.86	2.0556	0.62	No	No	No		3.72093	Moderate PAL	female	Drinks Alcohol 1-2 times/week	No	No	No	0.544288	5.5	6.6	No	128.928	4.85926	No	No	Yes	2.95	Secondary	Highly Skilled	0-9	No	No	No	2.80336	Yes
426	19	64.3	158.8	48.1	No	Yes	25.4982	25-29.99 kg/m.sq	116	59	79.2667	101.533	0.780696	No	4.4	3.9	4.3	1.26	2.90239	0.3	No	No	No	No	3.4127	Low PAL	female	Rarely Drinks Alcohol	No	No	Yes	0.49916	5.2	2.5	No	108.948	4.69087	No	No	No		Secondary	Skilled	10-14	No	No	No	1.36098	No
427	19	51.9	160.1	26.3	No	Yes	20.2481	18.5-24.99 kg/m.sq	99	69	68.5	91.7667	0.746458	No	4	4.4	3.7	1.19	2.37239	0.3	No	Yes	No	No	3.10924	Low PAL	female	Drinks Alcohol 3 or more times/week	No	No	Yes	0.427858	8.1	8.5	No	200.886	5.30274	No	Yes	Yes	2.25	Secondary	Highly Skilled	10-14	No	No	No	1.4816	No
428	19	64.8	161.4	60.6	Yes	Yes	24.8753	18.5-24.99 kg/m.sq	101	69	85	99.2667	0.856279	No	4.5		4.5	0.87	3.29514	0.73	No	No	No	No	5.17241	Low PAL	female	Drinks Alcohol 3 or more times/week	No	No	Yes	0.526642	7.3	43.4	Yes	87.8911	4.4761	Yes	No	No	1.1	Secondary	Skilled	10-14	No	No	No		No
429	18	76.5	164.2	50.9	No	Yes	28.3736	25-29.99 kg/m.sq	98	61	79.6667	106.667	0.746875	No	4.5		4.8	0.84	3.69853	0.57	No	No	No	No	5.71429	Low PAL	female	Rarely Drinks Alcohol	No	No	Yes	0.485181	4.4	1	No	106.456	4.66773	No	No	No	1.15	Secondary	Skilled	10-14	No	No	No		No
430	18	59	173.5	48	No	Yes	19.5999	18.5-24.99 kg/m.sq	97	56	70.5	93.0667	0.757522	No	4.5	6.9	5	1.01	3.61385	0.82	No	No	No	No	4.9505	Moderate PAL	female	Rarely Drinks Alcohol	Yes	No	No	0.40634	6	7.3	No	119.281	4.78148	No	No	No	0.3	Secondary	Highly Skilled	10-14	No	No	No	1.93152	No
431	18	58.1	165.1	80.3	No	Yes	21.3148	18.5-24.99 kg/m.sq	102	65	63.7	93.2	0.683476	No	4.4	10.5	5.2	1.21	3.8111	0.39	No	No	No	No	4.29752	Low PAL	female	Drinks Alcohol 1-2 times/week	No	No	No	0.385827	6.2	2.2	No	67.8493	4.21729	No	No	No	0.3	Secondary	Highly Skilled	15-17	No	No	No	2.35138	Yes
432	18	47.4	157.4	56.8	No	No	19.1324	18.5-24.99 kg/m.sq	100	62	61.3	88.4	0.693439	No	4	3	4.5	1.71	2.67532	0.25	No	No	No	No	2.63158	Low PAL	female	Drinks Alcohol 3 or more times/week	No	No		0.389454	5.3	1.5	No	91.4472	4.51576	No	No	No	0.3	Tertiary	Skilled	10-14	No	No	No	1.09861	No
433	19	62.5	174.5	38.9	No	Yes	20.5253	18.5-24.99 kg/m.sq	103	60	72.5	101.2	0.716403	No	4.5	2	4	0.92	2.81853	0.57	No	No	No	No	4.34783	Moderate PAL	female	Drinks Alcohol 1-2 times/week	No	No	No	0.415473	7.5	14.3	No	148.033	4.99744	No	No	No	1.55	Secondary	Skilled	0-9	No	No	No	0.693147	No
434	18	84.3	167.3	45.1	Yes	Yes	30.1187	>=30 kg/m.sq	117	72	91.2	109.3	0.834401	No	3.9	9.2	4.6	0.9	3.33761	0.79	No	No	No	No	5.11111	Moderate PAL	female	Rarely Drinks Alcohol	Yes	No	No	0.545129	6.2	26.2	No	122.415	4.80741	No	No	No	1.45	Secondary	Semi/Unskilled	0-9	No	Yes	No	2.2192	No
435	19	61.2	157.2	66.9	No	Yes	24.7655	18.5-24.99 kg/m.sq	103	77	78	98.8	0.789474	No	4.8	5.3	4.4	1.25	2.9344	0.47	No	No	No	No	3.52	Low PAL	female	Rarely Drinks Alcohol	No	No	No	0.496183	6.9	2.5	No	77.5426	4.35083	No	No	No	0.5		Highly Skilled	10-14	No	No	No	1.66771	No
436	18	72.6	167.6	59.8	No	No	25.8457	25-29.99 kg/m.sq	126	49	76.9667	103.233	0.74556	No	4.5	14.6	4.1	1.36	2.62073	0.26	No	No	No	No	3.01471	Moderate PAL	female	Drinks Alcohol 3 or more times/week	No	Yes	No	0.459228	7.6	4.1	No	92.4883	4.52708	No	No	No	1.8		Skilled	10-14	No	No	No	2.68102	Yes
437	18	52.5	161	56.8	No	No	20.2538	18.5-24.99 kg/m.sq	116	68	67.8	88.7	0.764374	No	4		5.2	1.5	3.46605	0.51	No	No	No	No	3.46667	Low PAL	female	Never Drank Alcohol	No	No	Yes	0.421118	6.8	17	No	93.5387	4.53838	No	No		0.3	Primary/All Age	Semi/Unskilled	0-9	No	No	No		No
438	19	54.2	165	51.2	No	Yes	19.9082	18.5-24.99 kg/m.sq	111	63	66.3667	90.9	0.730106	Yes	4.4	5	5.6	1.04	4.18385	0.82	No	No	Yes	No	5.38462	Low PAL	female	Drinks Alcohol 3 or more times/week	Yes	No	No	0.402222	5.6	11.7	No	106.348	4.66671	No	No	No	2.2	Secondary	Skilled	15-17	No	No	No	1.60944	No
439	20	50.2	161	38.9	Yes	No	19.3665	18.5-24.99 kg/m.sq	107	42	83.7	87	0.962069	No	3.7	2	5.5	1.41	3.53954	1.2	No	No	Yes	No	3.90071	Low PAL	female	Rarely Drinks Alcohol	Yes	No	No	0.519876	10	2.5	No	136.581	4.91692	No	No	No	3.65	Tertiary	Highly Skilled	10-14	No	Yes	No	0.693147	No
440	18	50.1	154.9	53.9	No	Yes	20.8802	18.5-24.99 kg/m.sq	110	60	66.1667	90.7	0.729511	No	4.5		4.9	1.11	3.60651	0.4	No	No	No	No	4.41441	Low PAL	female	Drinks Alcohol 3 or more times/week	No	No		0.427157	8.7	5.9	No	94.8367	4.55216	No	No	No	0.3	Primary/All Age	Semi/Unskilled	0-9	No	No	No		No
441	19	59.8	169.4	76.2	No	No	20.8389	18.5-24.99 kg/m.sq	120	75	71.7667	94	0.763475	No	4.9	3.1	4.4	1.38	2.74936	0.59	No	No	No	No	3.18841	Low PAL	female	Rarely Drinks Alcohol	No	Yes		0.423652	7.2	15.8	No	73.3622	4.29541	No	No	No	0.3	Secondary	Skilled	10-14	No	No	No	1.1314	No
442	19	57.9	162	51.4	No	Yes	22.0622	18.5-24.99 kg/m.sq	119	59	70.1	92	0.761957	No	4.5	11	4.1	0.91	3.01569	0.38	No	No	No	No	4.50549	Moderate PAL	female	Rarely Drinks Alcohol	No	No	No	0.432716	4.7	7	No	104.008	4.64447	No	No	No	0.3	Secondary	Semi/Unskilled	0-9	No	No	No	2.3979	Yes
443	18	57	163.7	53.9	No		21.2705	18.5-24.99 kg/m.sq	104	54	67.2	90.7	0.740904								No	No	No			Low PAL	female	Rarely Drinks Alcohol		No		0.410507	5.5	6	No	100.224	4.60741	No	No	No	0.3	Secondary	Skilled	0-9	No	No	No		No
444	20	90.3	153.1		Yes	Yes	38.5245	>=30 kg/m.sq	106	59	102.833	116.833	0.880171	No	4	14.1	3.8	1.14	2.44899	0.46	No	No	No	No	3.33333	Moderate PAL	female	Drinks Alcohol 3 or more times/week	No	No	No	0.671674	7.1						No	No	1.05	Primary/All Age	Semi/Unskilled	10-14	No	No	No	2.64617	Yes
445	19	65.4	161.1	66.9	No	No	25.1992	25-29.99 kg/m.sq	101	72	77.3667	98.9667	0.781745	No	4.3	13.4	4.8	1.53	2.9122	0.78	No	No	No	No	3.13726	Low PAL	female	Rarely Drinks Alcohol	Yes	No	No	0.48024	7.4	2.7	No	79.4664	4.37533	No	No	No	1	Secondary	Semi/Unskilled	10-14	No	No	No	2.59525	Yes
446	19	50.2	162.5	70	No	Yes	19.0107	18.5-24.99 kg/m.sq	100	66	64.4333	85.1	0.757149	No	4.5	9.9	3.1	1.26	1.6611	0.39	No	No	No	No	2.46032	Moderate PAL	female	Rarely Drinks Alcohol	No	No	Yes	0.396513	3.6	4.5	No	76.6071	4.33869	No	No	No	0.45	Secondary	Highly Skilled	10-14	No	No	No	2.29253	Yes
447	19	72.7	168.4	48.2	No	No	25.636	25-29.99 kg/m.sq	115	79	74.5	106.333	0.700627	No	4.5	8.6	4.9	1.38	3.21725	0.66	No	No	No	No	3.55072	Moderate PAL	female	Never Drank Alcohol	No	No	No	0.442399	5.3			115.295	4.74749		No		2.75	Secondary	Semi/Unskilled	0-9	No	No	No	2.15176	No
448	19	78.6	163.7	48.1	Yes	No	29.3309	25-29.99 kg/m.sq	99	67	80	111.5	0.717489	No	5.1	6.5	4.1	1.67	2.28321	0.32	No	No	No	Yes	2.45509	Moderate PAL	female	Drinks Alcohol 3 or more times/week	No	No	Yes	0.488699	4.8	2.5	No	112.31	4.72126	No	No	Yes	0.3	Tertiary	Highly Skilled	15-17	Yes	No	No	1.8718	No
449	19	55.4	163.9	57.6	No	Yes	20.623	18.5-24.99 kg/m.sq	106	71	65.2	87.6667	0.743726	No	4.8	7.6	4.2	1.29	2.75404	0.34	No	No	No	No	3.25581	Low PAL	female	Never Drank Alcohol	No	No	No	0.397804	5.5	30.5	Yes	93.901	4.54224	Yes	No		0.3	Secondary	Semi/Unskilled	10-14	No	No	No	2.02815	No
450	19	105.4	154	51.2	Yes	Yes	44.4426	>=30 kg/m.sq	118	70	112.567	122.5	0.918912	No	5	24.5	4.3	0.83	3.26358	0.45	No	No	No	Yes	5.18072	Low PAL	female	Rarely Drinks Alcohol	No	No	Yes	0.730952	4.4	2.5	No	99.2578	4.59772	No	No	No	5.4	Secondary	Skilled	10-14	Yes	No	No	3.19867	Yes
451	20	50.3	157.5		No	Yes	20.2771	18.5-24.99 kg/m.sq	107	80	67.6667	91.6	0.738719	No	4.4	4.8	3.2	1.07	1.85936	0.59	No	No	No	No	2.99065	Low PAL	female	Drinks Alcohol 1-2 times/week	No	Yes	Yes	0.42963	5.6	56.8	Yes			Yes	No	No	0.95			10-14	No	No	No	1.56862	No
452	18	57.8	157.8	45.1	No	Yes	23.2121	18.5-24.99 kg/m.sq	99	56	67.6	94	0.719149	No	4.6	9.4	5.1	1.2	3.66605	0.51	No	No	No	No	4.25	High PAL	female	Rarely Drinks Alcohol	No	No	No	0.42839	6.2	5.4	No	115.463	4.74895	No	No	No		Tertiary	Skilled	10-14	No	No	No	2.24071	No
453	19	50.7	159.5	54.4	No	No	19.9291	18.5-24.99 kg/m.sq	110	62	66.4	91	0.72967	Yes	4.6	2	7.6	1.58	5.8044	0.47	No	No	Yes	No	4.81013	Moderate PAL	female	Drinks Alcohol 1-2 times/week	No	No		0.416301	4	2.5	No	96.7555	4.57219	No	No	No	4.3	Secondary	Highly Skilled	10-14	No	No	No	0.693147	No
454	19	55.4	163.5	51.4	No	Yes	20.724	18.5-24.99 kg/m.sq	110	57	74.0667	88.5667	0.836282	No	3.8	17	3.1	1.16	1.66477	0.6	No	No	No	No	2.67241	Moderate PAL	female	Drinks Alcohol 3 or more times/week	No	No	No	0.453007	5.1	2.5	No	104.971	4.65368	No	No	No	7.4	Tertiary	Skilled	0-9	No	No	No	2.83321	Yes
455	19	49.7	163.8		No	Yes	18.5237	18.5-24.99 kg/m.sq	110	69	61.4667	91.8333	0.669328	No	4.3	6	4.3	1.14	2.92147	0.52	No	No	No	No	3.77193	High PAL	female	Never Drank Alcohol	No	No	Yes	0.375254	5.2	45.6	Yes			Yes	No		0.3	Tertiary	Skilled	10-14	No	No	No	1.79176	No
456	19	95.2	169.2	63.8	Yes	Yes	33.2534	>=30 kg/m.sq	100	74	100.4	115	0.873043	No	4.8	8.5	3.7	1.07	2.34101	0.63	No	No	No	No	3.45794	Moderate PAL	female	Rarely Drinks Alcohol	No	No	Yes	0.593381	9.3	3.7	No	87.5172	4.47184	No	No	No		Secondary	Skilled	10-14	No	No	No	2.14007	No
457	19	50.6	161	57.6	No	No	19.5209	18.5-24.99 kg/m.sq	116	81	63.5667	88.2333	0.720438	No	4.5	13.8	3.8	1.59	2.02193	0.41	No	No	No	No	2.38994	Low PAL	female	Rarely Drinks Alcohol	No	Yes	No	0.394824	7.6	2.9	No	92.2396	4.52439	No	No	No	0.9	Primary/All Age	Semi/Unskilled	0-9	No	No	No	2.62467	Yes
458	19	79.6	155.5	57.6	Yes	Yes	32.9194	>=30 kg/m.sq	126	91	90.7	111.5	0.813453	No	3.7	13	3.4	0.88	2.31358	0.45	Yes	No	No	No	3.86364	Moderate PAL	female	Drinks Alcohol 1-2 times/week	No	Yes	Yes	0.58328	6.1	10.5	No	89.0885	4.48963	No	No	No	2	Secondary	Semi/Unskilled	10-14	No	No	No	2.56495	Yes
459	19	55.8	155.4	57.6	No	Yes	23.1064	18.5-24.99 kg/m.sq	101	80	76.7	92.5	0.829189	Yes	4.3	13.1	6.1	1.2	4.10642	1.73	No	No	Yes	No	5.08333	High PAL	female	Drinks Alcohol 3 or more times/week	Yes	Yes		0.493565	8.7	5.9	No	89.0312	4.48899	No	No	Yes	7.75	Tertiary	Skilled	10-14	No	No	No	2.57261	Yes
460	20	59.5	164.7	45.5	No	Yes	21.9346	18.5-24.99 kg/m.sq	89	57	79	91	0.868132	No	4.3	6.3	3	1	1.91743	0.18	No	No	No	No	3	Low PAL	female	Rarely Drinks Alcohol	No	No		0.47966	6.6	4.3	No	119.453	4.78292	No	No		0.3	Secondary	Semi/Unskilled	10-14	No	No	No	1.84055	No
461	19	63.3	165.4	63.8	No	Yes	23.1384	18.5-24.99 kg/m.sq	113	71	77.3333	96.0667	0.804997	No	4.9	5.1	4	1.24	2.46183	0.65	No	No	No	No	3.22581	Low PAL	female	Drinks Alcohol 1-2 times/week	No	No	Yes	0.467553	7.7	2.5	No	85.5517	4.44912	No	No	Yes	2.7	Tertiary	Skilled	10-14	No	No	No	1.62924	No
462	19	46.5	170.6	63.7	No	Yes	15.977	<18.5 kg/m.sq.	95	69	58.9333	85.2667	0.691165	No	4	2	3.9	1.27	2.40064	0.5	No	No	No	No	3.07087	Low PAL	female	Drinks Alcohol 1-2 times/week	No	No	Yes	0.345447	4.9	8.3	No	88.3799	4.48164	No	No	No		Secondary	Skilled	0-9	No	No	No	0.693147	No
463	18	48.6	161.3	74.5	No	Yes	18.6796	18.5-24.99 kg/m.sq	111	70	61.3	87.8667	0.697648	No	6.1	3.7	4.1	1.07	2.75936	0.59	No	No	No	Yes	3.83178	Low PAL	female	Rarely Drinks Alcohol	No	No		0.380037	5.5	4.5	No	71.4483	4.26897	No	No	No		Secondary	Semi/Unskilled	10-14	No	No	No	1.30833	No
464	19	61.9	164.3	73.1	No	No	22.9306	18.5-24.99 kg/m.sq	119	58	70.4667	95.7667	0.735816	No	4.2	2.2	5.5	2.03	3.2544	0.47	No	No	Yes	No	2.70936	Moderate PAL	female	Rarely Drinks Alcohol	No	No	Yes	0.42889	5.5	2.5	No	74.171	4.30637	No	No	No	0.3	Tertiary	Highly Skilled	10-14	No	No	No	0.788457	No
465	19	52.8	162.1	57.6	No	No	20.0941	18.5-24.99 kg/m.sq	114	71	61.4667	90.2333	0.681197	No	4.7	13.4	3.1	1.34	1.59945	0.35	No	No	No	No	2.31343	Low PAL	female	Rarely Drinks Alcohol	No	No	Yes	0.37919	6.5	50.5	Yes	92.8698	4.5312	Yes	No	No	1.35		Skilled	0-9	No	No	No	2.59525	Yes
466	18	55.3	167.2	45.1	No	No	19.7812	18.5-24.99 kg/m.sq	102	70	62.1	93.8	0.662047	Yes	4.2	5.2	6	1.37	4.39147	0.52	No	No	Yes	No	4.37956	Low PAL	female	Drinks Alcohol 3 or more times/week	No	No	No	0.371411	5.4	14.4	No	122.341	4.80682	No	No	No	0.8	Primary/All Age		10-14	No	No	No	1.64866	No
467	19	55.4	169.9	35.6	No	No	19.1921	18.5-24.99 kg/m.sq	107	71	66.3667	95.3667	0.695911	No	5	11.7	4.3	1.35	2.79404	0.34	No	No	No	Yes	3.18519	Low PAL	female	Rarely Drinks Alcohol	No	No	Yes	0.390622	4.6	13.4	No	157.492	5.05937	No	No	No	0.5	Secondary	Skilled	0-9	No	No	No	2.45959	Yes
468	18	48.6	154	48	No	Yes	20.4925	18.5-24.99 kg/m.sq	99	54	65.8	85.0333	0.773814	No	4.5	7.3	4.9	1.07	3.60064	0.5	No	No	No	No	4.57944	High PAL	female	Drinks Alcohol 3 or more times/week	No	No	Yes	0.427273	4.9	5.2	No	105.875	4.66226	No	No	No	0.3	Secondary	Skilled	10-14	No	No	No	1.98787	No
469	19	55.7	166.3	48.2	No	Yes	20.1405	18.5-24.99 kg/m.sq	113	68	69.6667	89.5667	0.777819	No	4.3	10.4	4.2	1.2	2.77064	0.5	No	No	No	No	3.5	Moderate PAL	female	Drinks Alcohol 3 or more times/week	No	No	No	0.418922	10	5.6	No	113.857	4.73494	No	No	No	0.4	Secondary	Skilled	15-17	No	No	No	2.34181	Yes
470	19	53.6	164.5	45.1	No	No	19.8077	18.5-24.99 kg/m.sq	105	74	65.0667	91.4333	0.71163	Yes	4.6		5.8	1.31	4.10927	0.83	No	No	Yes	No	4.42748	Moderate PAL	female	Drinks Alcohol 1-2 times/week	Yes	No	Yes	0.395542	5.4	4.9	No	120.366	4.79054	No	No	No	0.7	Secondary	Semi/Unskilled	10-14	No	No	No		No
471	18	103.2	163	39.2	Yes	No	38.8423	>=30 kg/m.sq	101	62	97.4	117.933	0.82589	No	4.2	13	5.1	1.35	3.4289	0.7	No	No	No	No	3.77778	Low PAL	female	Rarely Drinks Alcohol	No	No	No	0.597546	9.1	3.5	No	137.219	4.92158	No	No	No		Tertiary	Highly Skilled	15-17	No	No	No	2.56495	Yes
472	18	53.3	168.5	53.9	No	Yes	18.7727	18.5-24.99 kg/m.sq	113	61	65.6	89.2	0.735426		4.8	8.8		0.97			No	No		No		Low PAL	female	Never Drank Alcohol		No	Yes	0.389318	4.9	524	Yes	103.163	4.63631	Yes	No		1.8	Tertiary	Skilled	15-17	No	No	No	2.17475	No
473	19	92.3	168.9	41.9	Yes	Yes	32.3551	>=30 kg/m.sq	142	52	87.4333	115	0.76029	Yes	5.2		7.1	1.17	5.4667	1.01	Yes	No	Yes	Yes	6.06838	Low PAL	female	Rarely Drinks Alcohol	Yes	Yes	Yes	0.517663	10.4	1.4	No	133.024	4.89053	No	No	No		Primary/All Age	Skilled	10-14	Yes	Yes	Yes		No
474	18	54.6	162	53.9	No	Yes	20.8048	18.5-24.99 kg/m.sq	102	59	59.7	81.9	0.728938	No	3.8	2	3.7	1	2.46147	0.52	No	No	No	No	3.7	Moderate PAL	female	Never Drank Alcohol	No	No		0.368519	5.4	12.2	No	99.1837	4.59697	No	No		1.8	Tertiary		10-14	No	No	No	0.693147	No
475	19	50.6	159	38.9	No	Yes	20.015	18.5-24.99 kg/m.sq	103	74	61.9	90.5333	0.683726	No	4.2	4	4.4	1.27	2.85018	0.61	No	No	No	No	3.46457	Moderate PAL	female	Never Drank Alcohol	No	No	No	0.389308	4.3	23.6	No	134.884	4.90442	No	No		0.3	Secondary	Semi/Unskilled	0-9	No	No	No	1.38629	No
476	19	44.4	163.6	88.7	No	No	16.5889	<18.5 kg/m.sq.	109	76	58	83.5	0.694611	No	4.8	2.1	5.2	1.69	3.37239	0.3	No	No	No	No	3.07692	Low PAL	female	Rarely Drinks Alcohol	No	No	Yes	0.354523	4.7	135	Yes	60.8658	4.10867	Yes	No	No	0.3	Tertiary	Skilled	15-17	No	No	No	0.741937	No
477	18	57.1	157.2	48	No	Yes	23.1063	18.5-24.99 kg/m.sq	102	62	68.4	95.5	0.71623	No	4.2	4.9	4.1	1.04	2.5967	1.01	No	No	No	No	3.94231	Low PAL	female	Rarely Drinks Alcohol	Yes	No	No	0.435115	4.8	7.5	No	108.075	4.68283	No	No	No	2.25	Tertiary	Semi/Unskilled	10-14	No	No	No	1.58924	No
478	18	49.1	164.3	24.5	No	Yes	18.1889	<18.5 kg/m.sq.	94	55	64.8	87.9	0.737201	No	4.2	9.5	4.9	1.1	3.43761	0.79	No	No	No	No	4.45455	Moderate PAL	female	Rarely Drinks Alcohol	Yes	No	No	0.394401	6.6	9.8	No	221.302	5.39953	No	No	No	1.45	Secondary	Highly Skilled	15-17	No	No	No	2.25129	No
479	19	79.9	177.5	50.9	Yes	Yes	25.36	25-29.99 kg/m.sq	142	84	90.6333	105.1	0.862353	Yes	4.7	9.1	8.5	0.82	7.16165	1.13	Yes	No	Yes	No	10.3659	Low PAL	female	Drinks Alcohol 1-2 times/week	Yes	Yes	No	0.51061	5.6	816.9	Yes	115.079	4.74562	Yes	No	No	1.7	Secondary	Semi/Unskilled	0-9	No	Yes	No	2.20827	No
480	19	47.5	165.6	57.6	No	Yes	17.321	<18.5 kg/m.sq.	113	75	63.2333	88.8	0.712087	No	4.3	4.4	4.2	1.15	2.82064	0.5	No	No	No	No	3.65217	Low PAL	female	Drinks Alcohol 1-2 times/week	No	No	Yes	0.381844	5.5	56.7	Yes	94.875	4.55256	Yes	No	Yes	0.3	Secondary	Skilled	15-17	No	No	No	1.4816	No
481	19	51.4	164.5	48.2	No	Yes	18.9947	18.5-24.99 kg/m.sq	109	80	63	88.8	0.709459	No	4.2	2.4	3.8	1.19	2.2522	0.78	No	No	No	No	3.19328	Low PAL	female	Rarely Drinks Alcohol	Yes	Yes		0.382979	8.6	11.3	No	112.624	4.72406	No	No	No	0.7	Secondary	Semi/Unskilled	10-14	No	No	No	0.875469	No
482	19	74.5	158.7	42	Yes	Yes	29.5803	25-29.99 kg/m.sq	114	64	86.5	111.5	0.775785	No	3.9	12.5	5.2	0.92	3.91761	0.79	No	No	No	No	5.65217	Low PAL	female	Rarely Drinks Alcohol	Yes	No	No	0.545054	10.8	17.8	No	124.693	4.82585	No	No	No	8.6	Primary/All Age	Semi/Unskilled	0-9	No	Yes	No	2.52573	Yes
483	19	64.4	159.7	54.5	No	Yes	25.2509	25-29.99 kg/m.sq	99	75	74.4	101.333	0.734211	No	4.1	3.9	3.9	1	2.75321	0.32	No	No	No	No	3.9	High PAL	female	Never Drank Alcohol	No	No	No	0.465874	4.4	2.5	No	96.6991	4.5716	No	No		2.9	Tertiary	Highly Skilled	10-14	No	No	No	1.36098	No
484	19	57.5	166.4	76.3	No	Yes	20.7664	18.5-24.99 kg/m.sq	122	62	70.0333	94.9	0.73797	No	5.1	3.5	3.5	1.28	2.05486	0.36	No	No	No	Yes	2.73438	Low PAL	female	Never Drank Alcohol	No	Yes		0.420873	4.2	33.7	Yes	71.9685	4.27623	Yes	No		1.25	Secondary	Semi/Unskilled	0-9	No	No	No	1.25276	No
485	19	64.8	165.8	41.9	No	No	23.5725	18.5-24.99 kg/m.sq	98	72	74.1333	100.067	0.740839	No	4	3	5.4	1.52	3.67817	0.44	No	No	Yes	No	3.55263	Low PAL	female	Rarely Drinks Alcohol	No	No	No	0.447125	7.8	2.5	No	130.582	4.872	No	No	No	0.65	Secondary	Skilled	10-14	No	No	No	1.09861	No
486	19	48.2	162.4	512	No	No	18.2757	<18.5 kg/m.sq.	110	70	63.3333	85.5	0.740741	No	4.3	2	3.7	1.47	2.10615	0.27	No	No	No	No	2.51701	Moderate PAL	female	Rarely Drinks Alcohol	No	No		0.389984	5.8	12.4	No	10.4672	2.34825	Yes	Yes	Yes	0.6		Skilled	0-9	No	No	No	0.693147	No
487	18	54.4	154.9	74.5	No	No	22.6723	18.5-24.99 kg/m.sq	105	76	65.5	93.4	0.701285	No	4.3	5.7	4.8	1.74	2.75266	0.67	No	No	No	No	2.75862	Low PAL	female	Rarely Drinks Alcohol	No	No	Yes	0.422853	6.1	10.1	No	68.6134	4.22849	No	No	No	0.95	Tertiary	Highly Skilled	15-17	No	No	No	1.74047	No
488	19	44.8	162.1	57.6	No	Yes	17.0495	<18.5 kg/m.sq.	97	59	62.2333	82.8333	0.751308	No	4.4	2.2	3.7	0.75	2.71147	0.52	No	No	No	No	4.93333	Low PAL	female	Rarely Drinks Alcohol	No	No		0.383919	6.6	3.6	No	92.8698	4.5312	No	No	No		Secondary	Skilled	10-14	No	No	No	0.788457	No
489	19	47.9	149	42	No	No	21.5756	18.5-24.99 kg/m.sq	106	69	64.8333	87.8	0.738421	No	4	4.5	4.7	1.44	2.76459	1.08	No	No	No	No	3.26389	Moderate PAL	female	Never Drank Alcohol	Yes	No	Yes	0.435123	6.7	5.1	No	117.071	4.76278	No	No		1	Secondary	Skilled	0-9	No	No	No	1.50408	No
490	19	53.7	174	57.5	No	No	17.7368	<18.5 kg/m.sq.	118	69	64.7333	87.3333	0.741221	No	4.2	3.4	4.9	1.33	3.33147	0.52	No	No	No	No	3.68421	High PAL	female	Rarely Drinks Alcohol	No	No	Yes	0.372031	7.3	10.6	No	99.8609	4.60378	No	No	No	5.1	Tertiary	Skilled	0-9	No	No	No	1.22378	No
491	19	68.2	165.1	54.5	Yes	No	25.0202	25-29.99 kg/m.sq	113	58	83.0333	99.3333	0.835906	No	4.1	10.3	5.2	1.72	3.21394	0.58	No	No	No	No	3.02326	Low PAL	female	Drinks Alcohol 1-2 times/week	No	No	Yes	0.502927	7.1	2.9	No	99.9688	4.60486	No	No	No	1	Secondary	Semi/Unskilled	15-17	No	No	No	2.33214	Yes
492	19	59.9	162.2	29.4	No	Yes	22.768	18.5-24.99 kg/m.sq	98	52	73	94.5	0.772487	No	4.3	5.8	3.7	0.97	2.28505	0.97	No	Yes	No	No	3.81443	Low PAL	female	Drinks Alcohol 3 or more times/week	Yes	No	No	0.450062	9	14.2	No	182.061	5.20434	No	Yes	Yes	0.65	Primary/All Age	Skilled	10-14	No	No	No	1.75786	No
493	19	42.9	165.6	48.5	No	No	15.6436	<18.5 kg/m.sq.	109	67	60.1333	82.5	0.728889	No	4.7	7.4	5.2	1.58	3.36312	0.56	No	No	No	No	3.29114	Low PAL	female	Drinks Alcohol 3 or more times/week	No	No	No	0.363124	9.1	28.4	No	112.676	4.72452	No	No	Yes	0.3	Primary/All Age	Semi/Unskilled	0-9	No	No	No	2.00148	No
494	19	66.7	181.5	85.6	No	No	20.2476	18.5-24.99 kg/m.sq	127	59	71.5333	88.7333	0.806161	No	4.8	2.3	4.9	1.23	3.46358	0.45	No	No	No	No	3.98374	Low PAL	male	Rarely Drinks Alcohol	No	Yes		0.394123	5	2.5	No	78.4521	4.36249	No	No	No	0.3	Secondary	Semi/Unskilled	10-14	No	No	No	0.832909	No
495	19	64.5	176.6	88.7	No	No	20.6813	18.5-24.99 kg/m.sq	113	71	69.6	89.0667	0.781437	No	4.8	6.7	3.7	1.16	2.36569	0.38	No	No	No	No	3.18966	Low PAL	male	Rarely Drinks Alcohol	No	No	Yes	0.394111	4.5	7.7	No	73.6663	4.29955	No	No	No	0.3	Secondary	Semi/Unskilled	10-14	No	No	No	1.90211	No
496	19	74.5	174.9	98	No	No	24.3544	18.5-24.99 kg/m.sq	120	68	77.3	99	0.780808	No	4.9	2.1	4.5	1.41	2.96156	0.28	No	No	No	No	3.19149	Moderate PAL	male	Rarely Drinks Alcohol	No	Yes	No	0.441967	4.7	4.2	No	66.0337	4.19016	No	No	Yes	1.3		Semi/Unskilled	10-14	No	No	No	0.741937	No
497	19	60.4	176	89.2	No	No	19.499	18.5-24.99 kg/m.sq	127	73	69.0667	90.8667	0.760088	No	4.4	3.1	5	1.27	3.50523	0.49	No	Yes	No	No	3.93701	High PAL	male	Rarely Drinks Alcohol	No	Yes	Yes	0.392424	2.6	2.1	No	73.0045	4.29052	No	Yes	No	0.3		Skilled	0-9	No	No	No	1.1314	No
498	18	98.6	175.1	56.8	No	Yes	32.1592	>=30 kg/m.sq	116	71	89.2333	116.833	0.763766	No	4.7	6.5	3.8	0.83	2.6856	0.62	No	No	No	No	4.57831	Moderate PAL	male	Drinks Alcohol 3 or more times/week	No	No	Yes	0.509614	5.4	0.6	No	114.062	4.73674	No	No	Yes		Tertiary	Semi/Unskilled	15-17	No	No	No	1.8718	No
499	18	67.9	177.4	119.8	No	No	21.5756	18.5-24.99 kg/m.sq	127	64	71.3	89.4	0.797539	No	5	5.3	4.6	1.02	3.24514	0.73	No	No	No	Yes	4.5098	Moderate PAL	male	Rarely Drinks Alcohol	No	Yes	No	0.401917	5	2.5	No	54.7896	4.0035	Yes	No	Yes	2	Secondary	Skilled	0-9	No	No	No	1.66771	No
500	18	65.1	176.9	71.5	No	No	20.803	18.5-24.99 kg/m.sq	119	65	68.4	94.0333	0.727402	No	5	3	3.9	1.23	2.4911	0.39	No	No	No	Yes	3.17073	Moderate PAL	male	Rarely Drinks Alcohol	No	No	Yes	0.386659	5.2	1.2	No	91.5427	4.51681	No	No	No	0.75		Semi/Unskilled	10-14	No	No	No	1.09861	No
501	19	65.4	169.7	104.3	No	No	22.7098	18.5-24.99 kg/m.sq	112	59	73.4333	92.7333	0.791876	No	4.7	4.2	4.2	1.28	2.62642	0.64	No	No	No	No	3.28125	Moderate PAL	male	Rarely Drinks Alcohol	No	No		0.432724	6.5	2.9	No	60.2004	4.09768	No	Yes	No	0.6	Secondary	Semi/Unskilled	10-14	No	No	No	1.43508	No
502	19	63.4	171.3	77.4	No	No	21.606	18.5-24.99 kg/m.sq	106	66	70.4333	89.5	0.786965	No	3.7		4.9	2.13	2.56358	0.45	No	No	No	No	2.30047	High PAL	male	Drinks Alcohol 3 or more times/week	No	No	No	0.411169	4.6	4.5	No	81.8876	4.40535	No	No	Yes	0.45	Secondary	Highly Skilled	10-14	No	No	No		No
503	18	105.6	171.7	92.1	Yes	Yes	35.8198	>=30 kg/m.sq	127	63	106.7	110.567	0.965029	No	4.9	18.4	4.8	0.64	3.60954	1.2	No	No	No	No	7.5	Low PAL	male	Drinks Alcohol 1-2 times/week	Yes	Yes		0.621433	6.4	2.6	No	68.9783	4.23379	No	No	No	0.8	Tertiary	Highly Skilled	15-17	No	Yes	No	2.91235	Yes
504	20	58.7	172.6	82.5	No	No	19.7041	18.5-24.99 kg/m.sq	125	91	66.7333	87.1667	0.765583	No	5	2.5	4.5	1.31	3.03404	0.34	Yes	No	No	Yes	3.43511	Moderate PAL	male	Drinks Alcohol 3 or more times/week	No	Yes		0.386636	4.1	2.5	No	77.4085	4.3491	No	Yes	No	0.3	Tertiary	Skilled	10-14	No	No	No	0.916291	No
505	18	61.5	168.8	77.4	No	No	21.5839	18.5-24.99 kg/m.sq	113	74	71.8333	84.8	0.847091	Yes	5	7.4	5.6	1.02	4.24972	0.72	No	No	Yes	Yes	5.4902	High PAL	male	Rarely Drinks Alcohol	No	No	No	0.425553	5.6	4.8	No	80.6925	4.39065	No	No	No	0.9		Skilled	10-14	No	No	No	2.00148	No
506	19	64.5	173.4	94.9	No	No	21.4517	18.5-24.99 kg/m.sq	124	85	71.9667	87.1	0.826253	No	5	2	4.7	1.01	3.26339	0.93	No	Yes	No	Yes	4.65347	High PAL	male	Drinks Alcohol 3 or more times/week	Yes	Yes	No	0.415033	6	2.5	No	67.6059	4.2137	No	Yes	Yes		Secondary	Skilled	10-14	No	No	No	0.693147	No
507	19	66	175.5	94.9	No	No	21.4284	18.5-24.99 kg/m.sq	108	57	75.1	92.8	0.809267	No	4.1	3.5	4.3	1.49	2.61275	0.43	No	No	No	No	2.88591	High PAL	male	Drinks Alcohol 3 or more times/week	No	No	No	0.42792	8.9	2.5	No	68.4247	4.22573	No	Yes	No	0.35	Secondary		15-17	No	No	No	1.25276	No
508	19	96.1	174.6	20	Yes	Yes	31.5235	>=30 kg/m.sq	111	70	102.067	110.367	0.924796	No	4.8	12.5	5	0.83	3.44982	1.57	No	No	No	No	6.0241	Moderate PAL	male	Never Drank Alcohol	Yes	No		0.584574	5.9	188	Yes	323.01	5.77768	Yes	No		0.4	Secondary	Skilled	10-14	No	Yes	No	2.52573	Yes
509	19	74	177.5	101.1	No	Yes	23.4874	18.5-24.99 kg/m.sq	104	65	78.9333	97.9	0.806265	No	5.2	3.4	1.7	0.62	1.01119	0.15	No	No	No	Yes	2.74194	Low PAL	male	Drinks Alcohol 3 or more times/week	No	No		0.444695	4.5	2.5	No	64.9604	4.17378	No	No	Yes			Semi/Unskilled	15-17	No	No	No	1.22378	No
510	18	70.5	170.5	89.2	No	No	24.2516	18.5-24.99 kg/m.sq	120	65	76.7	92.5	0.829189	No	4.6	3.2	3.8	1.07	2.54193	0.41	No	No	No	No	3.5514	High PAL	male	Drinks Alcohol 1-2 times/week	No	Yes	Yes	0.449853	5.4	2.5	No	70.7231	4.25877	No	Yes	No	4.2	Tertiary	Highly Skilled	15-17	No	No	No	1.16315	No
511	19	64.7	169.1	73.1	No	No	22.6265	18.5-24.99 kg/m.sq	124	66	71.5	95	0.752632	No	5.3	3.3	4.4	1.06	3.06477	0.6	No	No	No	Yes	4.15094	High PAL	male	Drinks Alcohol 3 or more times/week	No	Yes	No	0.422827	6.7	2.6	No	85.591	4.44958	No	No	Yes	0.3	Secondary	Semi/Unskilled	0-9	No	No	No	1.19392	No
512	19	53.8	169.1	85.6	No	No	18.8146	18.5-24.99 kg/m.sq	104	70	67.3333	84	0.801587	No	4.7	2	3.5	1.14	2.17193	0.41	No	No	No	No	3.07018	Low PAL	male	Never Drank Alcohol	No	No		0.398186	4.5	2.5	No	73.0923	4.29172	No	No		0.3		Skilled	10-14	No	No	No	0.693147	No
513	19	61.5	171.7	41.9	No	No	20.861	18.5-24.99 kg/m.sq	102	76	69.6667	91.9333	0.757795	No	4.6	3.2	3.9	1.15	2.46101	0.63	No	No	No	No	3.3913	High PAL	male	Never Drank Alcohol	No	No	No	0.405746	3.5	1.3	No	151.621	5.02138	No	Yes					10-14	No	No	No	1.16315	No
514	19	65.3	168.4	91.8	No	Yes	23.0266	18.5-24.99 kg/m.sq	106	62	74.2	93	0.797849	No	4.6	2.6	4.1	0.92	2.91853	0.57	No	No	No	No	4.45652	High PAL	male	Drinks Alcohol 3 or more times/week	No	No	No	0.440618	5	4	No	67.8736	4.21765	No	Yes	Yes	0.3	Secondary	Highly Skilled	10-14	No	No	No	0.955511	No
515	18	89.3	182.5	83.3	No	No	26.8118	25-29.99 kg/m.sq	106	47	83.4	108.4	0.769373	No	4.8	9.1	4.6	1.11	3.33862	0.33	No	No	No	No	4.14414	High PAL	male	Drinks Alcohol 1-2 times/week	No	No	Yes	0.456986	3.2	10	No	81.0624	4.39522	No	No	Yes	0.9	Secondary	Skilled	15-17	No	No	No	2.20827	No
516	19	61.4	178.7	73.1	No	No	19.2273	18.5-24.99 kg/m.sq	121	81	69.1	89	0.776405	No	4.5	2.4	3.7	1.1	2.40734	0.42	No	No	No	No	3.36364	Moderate PAL	male	Drinks Alcohol 1-2 times/week	No	Yes	No	0.386682	5.8	2.5	No	90.4501	4.5048	No	No	Yes	0.3	Secondary	Skilled	15-17	No	No	No	0.875469	No
517	18	57.6	172.8	77.4	No	Yes	19.2901	18.5-24.99 kg/m.sq	112	83	65.1333	81.5667	0.798529	No	4.1	4.6	3	0.95	1.84358	0.45	No	No	No	No	3.15789	High PAL	male	Rarely Drinks Alcohol	No	Yes		0.376929	3.7	3.7	No	82.6047	4.41407	No	No	No		Secondary	Skilled	0-9	No	No	No	1.52606	No
518	19	66.2	172.3	88.7	No	No	22.2991	18.5-24.99 kg/m.sq	114	48	76.0667	90.4333	0.841135	No	4.5	2	3.9	1.11	2.5056	0.62	No	No	No	No	3.51351	Moderate PAL	male	Never Drank Alcohol	No	No	No	0.441478	6	7.5	No	71.8726	4.2749	No	No			Secondary	Highly Skilled	10-14	No	No	No	0.693147	No
519	18	73.1	175	98	No	No	23.8694	18.5-24.99 kg/m.sq	118	68	74.5	94.2	0.79087	No	4.9	3.6	4.9	2.04	2.63982	0.48	No	No	No	No	2.40196	High PAL	male	Drinks Alcohol 1-2 times/week	No	No	No	0.425714	6.4	2.5	No	66.0714	4.19074	No	No	Yes	0.3		Skilled	10-14	No	No	No	1.28093	No
520	19	65.5	173.6	91.8	No	No	21.7341	18.5-24.99 kg/m.sq	126	82	69.7	90.5	0.770166	No	3.9	2	3.4	1.76	1.4611	0.39	No	Yes	No	No	1.93182	High PAL	male	Drinks Alcohol 3 or more times/week	No	Yes	No	0.401498	4.1	2.5	No	69.9695	4.24806	No	Yes	Yes	0.5	Secondary	Skilled	10-14	No	No	No	0.693147	No
521	19	56.8	172.2	83.3	No	No	19.155	18.5-24.99 kg/m.sq	113	74	67.0667	85.3333	0.785937	No	3.8		4.3	1.2	2.78349	0.69	No	No	No	No	3.58333	Moderate PAL	male	Drinks Alcohol 1-2 times/week	No	No		0.38947	4.2	1.2	No	76.4874	4.33713	No	Yes	Yes	0.3	Secondary	Semi/Unskilled	10-14	No	No	No		No
522	19	70.2	179.6	101.1	No	No	21.7633	18.5-24.99 kg/m.sq	106	67	71.8333	95.7333	0.750348		5.5	2		1.17			No	No		Yes		Moderate PAL	male	Rarely Drinks Alcohol		No	No	0.399963	6.6	11.7	No	65.729	4.18554	No	No	No	0.35	Tertiary	Skilled	10-14	No	No	No	0.693147	No
523	18	53.3	176	71.5	No	No	17.2069	<18.5 kg/m.sq.	114	72	63	83.1667	0.757515	No	4.1	3.7	4.2	1.11	2.85147	0.52	No	No	No	No	3.78378	High PAL	male	Drinks Alcohol 1-2 times/week	No	No	No	0.357955	5.9	4.9	No	91.0769	4.5117	No	No	No	1.1	Secondary	Skilled	10-14	No	No	No	1.30833	No
524	19	66.8	174.4	88.7	No	No	21.9626	18.5-24.99 kg/m.sq	121	45	72.8	91	0.8	No	5.1	5.8	3.1	1.15	1.84908	0.22	No	No	No	Yes	2.69565	High PAL	male	Never Drank Alcohol	No	Yes	No	0.417431	3.7	2.6	No	72.7486	4.28701	No	No		0.8	Secondary	Skilled	10-14	No	No	No	1.75786	No
525	18	59.1	177.5	71.5	No	No	18.7582	18.5-24.99 kg/m.sq	97	46	68.4	86	0.795349	No	4.9	8.9	5	1.01	3.81569	0.38	No	No	No	No	4.9505	High PAL	male	Rarely Drinks Alcohol	No	No	No	0.385352	4.9	5	No	91.8531	4.52019	No	No	No	1.3	Tertiary	Skilled	10-14	No	No	No	2.18605	No
526	18	75.1	180.5		No		23.0508	18.5-24.99 kg/m.sq	115	60	79.2667	98.5333	0.804465		4.7	5.3	5.3			1.24	No	Yes	Yes	No		High PAL	male	Drinks Alcohol 1-2 times/week	Yes	No	No	0.43915	7	1.9	No				Yes	No	0.85	Secondary	Highly Skilled	10-14	No	No	No	1.66771	No
527	18	74	182.4	92.1	No	Yes	22.2424	18.5-24.99 kg/m.sq	118	66	75.2667	93.7	0.803273	No	4.8	5.3	3.4	0.93	2.26817	0.44	No	No	No	No	3.65591	Moderate PAL	male	Rarely Drinks Alcohol	No	No	No	0.412646	3.6	15.6	No	73.2769	4.29425	No	No	No	0.85	Tertiary	Skilled	10-14	No	No	No	1.66771	No
528	19	92.9	183.9	85.6	Yes	Yes	27.4696	25-29.99 kg/m.sq	112	73	95.5667	106.1	0.900723	No	4.6	5.8	3.5	0.61	2.57807	0.68	No	No	No	No	5.7377	Low PAL	male	Rarely Drinks Alcohol	No	No	Yes	0.519666	5	11.1	No	79.4895	4.37562	No	No	Yes	5.2	Tertiary		10-14	No	No	No	1.75786	No
529	19	70.1	174.4	98	No	Yes	23.0476	18.5-24.99 kg/m.sq	115	80	73	93.0667	0.784384	No	4.4	7.6	4.5	0.89	3.31183	0.65	No	No	No	No	5.05618	Moderate PAL	male	Drinks Alcohol 3 or more times/week	No	Yes		0.418578	3.8	2.5	No	65.8449	4.1873	No	No	Yes	0.5		Semi/Unskilled	10-14	No	No	No	2.02815	No
530	19	61.4	164.1	73.1	No	No	22.8009	18.5-24.99 kg/m.sq	118	68	73.5	93.3333	0.7875	No	5.2	8.6	3.2	1.07	2.00156	0.28	No	No	No	Yes	2.99065	Moderate PAL	male	Drinks Alcohol 1-2 times/week	No	No	No	0.447898	6.4	3.3	No	83.0602	4.41957	No	Yes	No	1.7	Secondary		10-14	No	No	No	2.15176	No
531	18	83.7	176.5	30.4	No	Yes	26.868	25-29.99 kg/m.sq	136	86	87.9	100.2	0.877246	No	5.1	8.8	5.6	0.99	3.94945	1.44	No	No	Yes	Yes	5.65657	High PAL	male	Drinks Alcohol 3 or more times/week	Yes	Yes		0.498017	6.2	6.2	No	214.819	5.3698	No	No	No	0.8	Primary/All Age	Skilled	0-9	No	No	No	2.17475	No
532	18	81.1	173.2	77.4	No	No	27.0349	25-29.99 kg/m.sq	106	76	83.8	102.8	0.815175	No	4.8	6	4.1	1.25	2.51055	0.74	No	No	No	No	3.28	Moderate PAL	male	Drinks Alcohol 1-2 times/week	No	No	No	0.483834	3.9	5.1	No	82.7959	4.41638	No	No	No	4.55	Secondary	Skilled	10-14	No	No	No	1.79176	No
533	19	59.2	173.6	91.8	No	No	19.6437	18.5-24.99 kg/m.sq	108	69	67	87	0.770115	No	5.1	3.5	3.7	1.76	1.63725	0.66	No	No	No	Yes	2.10227	Moderate PAL	male	Drinks Alcohol 3 or more times/week	No	No	Yes	0.385945	9.9	2.5	No	69.9695	4.24806	No	Yes	No	0.3	Tertiary	Highly Skilled	10-14	No	No	No	1.25276	No
534	18	67.3	176.5	98	No	No	21.6036	18.5-24.99 kg/m.sq	103	70	73.3	89	0.823596	No	4.9	3.2	3.8	1.38	2.16771	0.55	No	No	No	No	2.75362	High PAL	male	Drinks Alcohol 1-2 times/week	No	No	Yes	0.415297	5.3	7.4	No	66.6378	4.19927	No	No	Yes	0.3	Secondary		10-14	No	No	No	1.16315	No
535	18	70.3	183.4	106.8	No	No	20.9005	18.5-24.99 kg/m.sq	116	66	71.0667	93.2333	0.762245	No	4.6	6.7	5.2	1.08	3.81725	0.66	No	No	No	No	4.81481	High PAL	male	Drinks Alcohol 1-2 times/week	No	No	No	0.387495	4.4	11.8	No	63.5374	4.15163	No	No	No	2.9	Tertiary	Highly Skilled	10-14	No	No	No	1.90211	No
536	19	66.5	175.4	85.6	No	No	21.6154	18.5-24.99 kg/m.sq	109	80	73.8	97	0.760825	No	4.9	2	5.1	1.41	3.54321	0.32	No	No	No	No	3.61702	Low PAL	male	Drinks Alcohol 3 or more times/week	No	Yes	Yes	0.420753	4	6.2	No	75.8154	4.3283	No	Yes	Yes	0.3		Semi/Unskilled	0-9	No	No	No	0.693147	No
537	18	51.3	165.9	74.5	No	Yes	18.6391	18.5-24.99 kg/m.sq	106	69	63.7	80.9333	0.787068	No	5	3.6	3.8	0.98	2.6411	0.39	No	No	No	Yes	3.87755	Moderate PAL	male	Drinks Alcohol 3 or more times/week	No	No	No	0.383966	3.8	6.9	No	82.3933	4.4115	No	No	No	0.3	Tertiary		10-14	No	No	No	1.28093	No
538	18	76.1	173.2	68.6	No	Yes	25.3682	25-29.99 kg/m.sq	116	79	79.2	94.7	0.836325	Yes	4.3	4.8	5.6	0.86	4.1345	1.32	No	No	Yes	No	6.51163	Low PAL	male	Drinks Alcohol 3 or more times/week	Yes	No	No	0.457275	5.2	1.5	No	93.4169	4.53707	No	No	No		Tertiary	Highly Skilled	10-14	No	No	No	1.56862	No
539	18	86.3	180.8	65.6	No	No	26.4006	25-29.99 kg/m.sq	129	64	80.4333	103.567	0.776633	No	5	10.3	5	1.1	3.47339	0.93	No	No	No	Yes	4.54545	Low PAL	male	Drinks Alcohol 1-2 times/week	Yes	Yes	No	0.444875	5.2	14	No	101.976	4.62473	No	No	Yes	0.9	Secondary	Skilled	10-14	No	No	No	2.33214	Yes
540	19	68.9	174.1	51.4	No	Yes	22.7312	18.5-24.99 kg/m.sq	101	75	73.9667	94.6667	0.781338	No	4.6	10.8	3.9	0.89	2.58339	0.93	No	No	No	No	4.38202	Low PAL	male	Rarely Drinks Alcohol	Yes	No	Yes	0.424852	6	3.9	No	125.325	4.83091	No	No	No	0.8	Secondary	Semi/Unskilled	0-9	No	No	No	2.37955	Yes
541	19	72.4	175.3	94.9	No	No	23.56	18.5-24.99 kg/m.sq	105	64	73.9	94	0.78617	No	4.9	3.9	3.7	1.06	2.25009	0.85	No	No	No	No	3.49057	Low PAL	male	Drinks Alcohol 1-2 times/week	Yes	No		0.421563	6.4	2.5	No	68.3467	4.22459	No	No	No	1.45	Secondary	Skilled	10-14	No	No	No	1.36098	No
542	19	63.7	165.8	70	No	Yes	23.1724	18.5-24.99 kg/m.sq	159	125	72.6667	86.9667	0.835569	No	5.1	2	3.7	0.69	2.6889	0.7	Yes	Yes	No	Yes	5.36232	Moderate PAL	male	Drinks Alcohol 3 or more times/week	No	Yes	Yes	0.438279	3.6	31.4	Yes	87.6371	4.47321	Yes	No	Yes	0.3	Secondary	Semi/Unskilled	10-14	No	No	No	0.693147	No
543	19	78	176.6	101.1	No	No	25.01	25-29.99 kg/m.sq	118	71	74.8333	99.5333	0.751842	No	5.3	5.9	4.3	1.44	2.64899	0.46	No	No	No	Yes	2.98611	High PAL	male	Drinks Alcohol 1-2 times/week	No	No	No	0.423745	7.5	3.7	No	64.6311	4.16869	No	No	No	0.8	Secondary	Skilled	10-14	No	No	No	1.77495	No
544	19	59.6	172.7		No		19.983	18.5-24.99 kg/m.sq	106	41	69.9667	84.9	0.824107								No	Yes				High PAL	male	Drinks Alcohol 3 or more times/week		No	Yes	0.405134							Yes	Yes		Secondary	Skilled	10-14	No	No	No		No
545	19	58.6	174.5	104.3	No	No	19.2445	18.5-24.99 kg/m.sq	98	77	64.7333	86.5333	0.748074	No	5	2.5	2.9	1.54	1.20862	0.33	No	No	No	Yes	1.88312	Moderate PAL	male	Rarely Drinks Alcohol	No	No	Yes	0.370965	4.2	2	No	61.9032	4.12557	No	No	No	0.55		Semi/Unskilled	0-9	No	No	No	0.916291	No
546	19	117.9	180.7	57.5	Yes	No	36.1075	>=30 kg/m.sq	110	79	103.567	120.7	0.85805	No	5	12.2	4.9	1.07	3.2933	1.17	No	No	No	Yes	4.57944	Moderate PAL	male	Rarely Drinks Alcohol	Yes	No	No	0.573142	6.1	1.8	No	116.277	4.75597	No	No	No	3.45	Primary/All Age	Skilled	10-14	Yes	Yes	Yes	2.50144	Yes
547	19	66.2	185.1	98	No	No	19.3217	18.5-24.99 kg/m.sq	115	73	72.1	90.5	0.796685	No	5.2	5	3	1.02	1.84697	0.29	No	Yes	No	Yes	2.94118	Low PAL	male	Drinks Alcohol 3 or more times/week	No	No	No	0.389519	3.6	4.5	No	69.8847	4.24685	No	Yes	No	0.3	Secondary	Skilled	10-14	No	No	No	1.60944	No
548	18	76.1	173.3	77.4	No	Yes	25.3389	25-29.99 kg/m.sq	112	82	84.4	98.1	0.860347	No	4.2	8	3	0.95	1.77936	0.59	No	No	No	No	3.15789	High PAL	male	Drinks Alcohol 1-2 times/week	No	Yes	No	0.487017	7.7	3.6	No	82.8437	4.41696	No	No	No	0.3	Secondary	Skilled	15-17	No	No	No	2.07944	No
549	20	67.8	181.5	94.9	No	Yes	20.5815	18.5-24.99 kg/m.sq	113	68	69.9	91	0.768132	No	4.5	2.6	3.3	0.96	2.12899	0.46	No	No	No	No	3.4375	Low PAL	male	Drinks Alcohol 3 or more times/week	No	No	Yes	0.385124	6	8.1	No	70.764	4.25935	No	Yes	No	0.3	Primary/All Age	Semi/Unskilled	10-14	No	No	No	0.955511	No
550	19	66.3	182.8	88.7	No	No	19.8409	18.5-24.99 kg/m.sq	101	80	66.4667	91.3	0.728003	No	4.9	2.4	5.5	1.53	3.62596	0.75	No	No	Yes	No	3.59477	Low PAL	male	Rarely Drinks Alcohol	Yes	Yes		0.363603	4.8	2.5	No	76.2525	4.33405	No	No	No	0.3	Primary/All Age	Semi/Unskilled	0-9	No	No	No	0.875469	No
551	18	59.2	177.2	77.4	No	No	18.8536	18.5-24.99 kg/m.sq	118	55	65.2	86.1	0.757259	No	4.8	2.4	3.1	1.04	1.93156	0.28	No	Yes	No	No	2.98077	High PAL	male	Drinks Alcohol 3 or more times/week	No	No	Yes	0.367946	6.6	1.5	No	84.708	4.43921	No	Yes	Yes	0.3	Primary/All Age	Skilled	0-9	No	No	No	0.875469	No
552	18	78	177.6	83.3	No	No	24.7291	18.5-24.99 kg/m.sq	120	59	83.7	98.0333	0.853791	Yes	4.7	18.3	6.4	1.2	4.77798	0.92	No	No	Yes	No	5.33333	Low PAL	male	Rarely Drinks Alcohol	Yes	Yes	Yes	0.471284	3.9	3.6	No	78.886	4.368	No	No	No	0.3	Secondary	Skilled	10-14	No	No	No	2.9069	Yes
553	19	119.1	177.2	51.4	Yes	No	37.9301	>=30 kg/m.sq	123	88	101.567	128.6	0.789787	Yes	5.4	11.9	7.2	1.54	5.01321	1.41	No	No	Yes	Yes	4.67532	Moderate PAL	male	Rarely Drinks Alcohol	Yes	Yes	Yes	0.573175	5.7	11.9	No	127.556	4.84856	No	No	No		Secondary	Highly Skilled	15-17	Yes	Yes	Yes	2.47654	Yes
554	19	66.7	179.1	82.5	No	No	20.7938	18.5-24.99 kg/m.sq	122	78	72	88	0.818182	No	4.7	2	3.9	1.33	2.34064	0.5	No	Yes	No	No	2.93233	Moderate PAL	male	Drinks Alcohol 3 or more times/week	No	Yes	No	0.40201	4.2	6.3	No	80.3236	4.38606	No	Yes	No	0.3		Skilled	0-9	No	No	No	0.693147	No
555	19	68.8	179.7	101.1	No	No	21.3055	18.5-24.99 kg/m.sq	107	80	68.3	89.4	0.763982	No	5	3.6	3.7	1.36	2.17945	0.35	No	No	No	Yes	2.72059	High PAL	male	Rarely Drinks Alcohol	No	Yes	No	0.380078	4.7	11.3	No	65.7656	4.1861	No	No	Yes		Tertiary	Highly Skilled	15-17	No	No	No	1.28093	No
556	18	56.7	170.5	83.3	No	No	19.5045	18.5-24.99 kg/m.sq	116	59	67.4	83.7	0.805257	No	4.6	4.6	3.8	1.05	2.37844	0.81	No	No	No	No	3.61905	Low PAL	male	Rarely Drinks Alcohol	Yes	No	Yes	0.395308	8.2	10	No	75.7323	4.3272	No	No	No	0.3	Secondary		0-9	No	No	No	1.52606	No
557	18	60.6	170	89.2	No	No	20.9689	18.5-24.99 kg/m.sq	104	49	66.6333	91.6667	0.726909	No	4.4	2.9	3.6	1.19	2.15771	0.55	No	No	No	No	3.02521	High PAL	male	Drinks Alcohol 1-2 times/week	No	No	No	0.391961	4.6	2.1	No	70.5157	4.25584	No	No	No	0.8	Secondary	Semi/Unskilled	0-9	No	No	No	1.06471	No
558	19	65.2	176.5	107.4	No	No	20.9295	18.5-24.99 kg/m.sq	117	55	70.1667	92.9333	0.755022		4.4	2		1.51			No	No		No		High PAL	male	Drinks Alcohol 3 or more times/week		No		0.397545	3.9	3.9	No	60.8054	4.10768	No	Yes	Yes	0.3		Skilled	10-14	No	No	No	0.693147	No
559	19	61.1	175.6	94.9	No	No	19.8149	18.5-24.99 kg/m.sq	109	79	68.3	88.7	0.770011	No	4.7	2	2.9	1.14	1.6178	0.31	No	No	No	No	2.54386	Low PAL	male	Drinks Alcohol 1-2 times/week	No	No	Yes	0.388952	6.7	7.7	No	68.4636	4.2263	No	No	No	0.7	Primary/All Age	Skilled	10-14	No	No	No	0.693147	No
560	19	67.7	183	113.6	No	No	20.2156	18.5-24.99 kg/m.sq	119	64	72.1	87.5667	0.823373	No	4.3	2	3.7	1.24	2.18477	0.6	No	No	No	No	2.98387	Low PAL	male	Rarely Drinks Alcohol	No	No	No	0.393989	3.3	50.6	Yes	59.6039	4.08772	Yes	No	No	0.6	Secondary	Semi/Unskilled	0-9	No	No	No	0.693147	No
561	19	78.7	176.4	82.4	No	Yes	25.2917	25-29.99 kg/m.sq	114	69	79.7333	103.333	0.771613	No	4.8	5.8	3.6	0.9	2.43853	0.57	No	No	No	No	4	Low PAL	male	Drinks Alcohol 3 or more times/week	No	No	No	0.452003	8.2	3.6	No	79.2087	4.37209	No	No	No	0.3		Semi/Unskilled	0-9	No	No	No	1.75786	No
562	19	79.6	186	82.4	No	Yes	23.0084	18.5-24.99 kg/m.sq	116	75	79	96.8	0.816116	No	5.2	11.5	4.4	0.98	3.18147	0.52	No	No	No	Yes	4.4898	Moderate PAL	male	Drinks Alcohol 3 or more times/week	No	No		0.424731	4.5	3.2	No	83.5194	4.42508	No	No	Yes	1.4	Secondary	Semi/Unskilled	10-14	No	No	No	2.44235	Yes
563	19	66.7	177.9	88.7	No	No	21.0753	18.5-24.99 kg/m.sq	105	84	70.3	94.3	0.745493	No	4.7	3.5	4.1	1.15	2.63349	0.69	No	No	No	No	3.56522	High PAL	male	Drinks Alcohol 3 or more times/week	No	Yes	No	0.395166	3.6	6.3	No	74.2086	4.30688	No	No	No		Tertiary	Skilled	10-14	No	No	No	1.25276	No
564	18	54.5	163	80.3	No	No	20.5126	18.5-24.99 kg/m.sq	88	59	62.8667	83	0.75743	No	3.9	5.6	3.3	1.16	1.97486	0.36	No	No	No	No	2.84483	High PAL	male	Drinks Alcohol 3 or more times/week	No	No	No	0.385685	7.2	2.6	No	75.1059	4.3189	No	Yes	Yes		Secondary	Skilled	0-9	No	No	No	1.72277	No
565	20	47.5	172.5	94.9	No	No	15.963	<18.5 kg/m.sq.	105	71	59.0667	79.5	0.742977	No	6.4	3.1	3.5	1.07	2.26028	0.37	No	No	No	Yes	3.27103	Moderate PAL	male	Rarely Drinks Alcohol	No	No		0.342415	4.9	2.5	No	67.255	4.20849	No	No	No	0.3	Secondary		10-14	No	No	No	1.1314	No
566	19	58.5	173	91.8	No	No	19.5463	18.5-24.99 kg/m.sq	103	63	66.3333	93.1667	0.711986	No	4.9	2.3	3.7	1.1	2.3844	0.47	No	Yes	No	No	3.36364	Moderate PAL	male	Drinks Alcohol 3 or more times/week	No	No		0.38343	6.5	2.5	No	69.7277	4.2446	No	Yes	No	2.5	Secondary		10-14	No	No	No	0.832909	No
567	20	75.3	173.2	88.7	No	Yes	25.1015	25-29.99 kg/m.sq	112	74	83.5	100.767	0.828647	No	4.9	9.7	3.5	0.95	2.34817	0.44	No	No	No	No	3.68421	Moderate PAL	male	Rarely Drinks Alcohol	No	No	Yes	0.482102	6.3	2.5	No	72.248	4.28011	No	No	No	1.75	Secondary	Skilled	10-14	No	No	No	2.27213	No
568	19	81.6	180.3	100.9	No	No	25.1014	25-29.99 kg/m.sq	117	73	79.9333	101.867	0.784686	No	4.2		3.8	1.09	2.50817	0.44	No	No	No	No	3.48624	High PAL	male	Drinks Alcohol 1-2 times/week	No	No	Yes	0.443335	3.2	1.5	No	66.116	4.19141	No	No	Yes	0.5	Tertiary	Highly Skilled	15-17	No	No	No		No
569	19	93.5	180.2	76.3	No		28.794	25-29.99 kg/m.sq	109	55	90.4667	111.1	0.814281								No	No	No			High PAL	male	Drinks Alcohol 3 or more times/week		No	Yes	0.502035	7.3	3.1	No	87.384	4.47031	No	Yes	Yes	1.75	Secondary	Skilled	15-17	No	No	No		No
570	19	71.4	169.2	88.7	No	Yes	24.9401	18.5-24.99 kg/m.sq	120	84	77.0667	92.2333	0.835562	No	4.5		3.6	0.7	2.65229	0.54	No	No	No	No	5.14286	Moderate PAL	male	Drinks Alcohol 1-2 times/week	No	Yes	No	0.455477	6.3	14.2	No	70.5795	4.25674	No	Yes	No	1.05	Secondary	Skilled	0-9	No	No	No		No
571	19	76	189.5	70	No	No	21.1639	18.5-24.99 kg/m.sq	129	87	72.5667	97.1333	0.747083	No	5.4	6	4.4	1.14	3.0444	0.47	No	No	No	Yes	3.85965	High PAL	male	Drinks Alcohol 3 or more times/week	No	Yes	Yes	0.382938	5.6	1.1	No	100.164	4.60681	No	Yes	No	0.3	Primary/All Age	Semi/Unskilled	10-14	No	No	No	1.79176	No
572	19	56.6	173.5		No		18.8026	18.5-24.99 kg/m.sq	107	79	68.3	85.8333	0.795728								No	No				High PAL	male	Drinks Alcohol 3 or more times/week		No	No	0.39366							Yes	No		Secondary	Skilled	0-9	No	No	No		No
573	19	68.8	179.7	85.6	No	No	21.3055	18.5-24.99 kg/m.sq	107	70	69.6333	94.4	0.737641	No	4.7	6.3	3.4	1.02	2.09101	0.63	No	No	No	No	3.33333	Low PAL	male	Never Drank Alcohol	No	No		0.387498	5.2	1.6	No	77.6741	4.35252	No	No		0.4	Secondary	Semi/Unskilled	0-9	No	No	No	1.84055	No
574	19	71.1	185.5	82.5	No	No	20.6624	18.5-24.99 kg/m.sq	126	69	72.7333	95.3333	0.762937	No	5.6	3.3	3.8	1.35	2.17936	0.59	No	Yes	No	Yes	2.81481	Moderate PAL	male	Drinks Alcohol 1-2 times/week	No	Yes	Yes	0.392093	5.7	7	No	83.1939	4.42117	No	Yes	Yes	0.3			10-14	No	No	No	1.19392	No
575	19	68.8	176.3	80.3	No	No	22.1352	18.5-24.99 kg/m.sq	103	64	75.9	95.1	0.798107	No	3.9		4.3	1.24	2.75725	0.66	No	No	No	No	3.46774	Moderate PAL	male	Rarely Drinks Alcohol	No	No		0.430516	3.1	4	No	81.2341	4.39734	No	No	No	0.9	Secondary	Skilled	10-14	No	No	No		No
576	19	80	187.1	29.6	No	Yes	22.853	18.5-24.99 kg/m.sq	126	80	83.2667	101.567	0.819823	No	5.4	14.3	4.5	0.62	2.69651	2.58	No	Yes	No	Yes	7.25806	High PAL	male	Drinks Alcohol 3 or more times/week	Yes	Yes	No	0.445038	8	2.5	No	233.875	5.45479	No	Yes	Yes	0.6	Tertiary	Highly Skilled	15-17	No	No	No	2.66026	Yes
577	18	65.8	166.8	71.5	No	Yes	23.6501	18.5-24.99 kg/m.sq	122	76.5	64.3333	86.1	0.747193	No	4.9	4.6	4.8	1	3.59358	0.45	No	No	No	No	4.8	Moderate PAL	male	Drinks Alcohol 3 or more times/week	No	Yes	No	0.385691	3.4	4.2	No	86.3161	4.45802	No	No	No	0.35	Secondary	Skilled	0-9	No	No	No	1.52606	No
578	19	76.2	174.6	83.3	No	No	24.9958	18.5-24.99 kg/m.sq	119	75	79.9	98.9	0.807887	Yes	4.2		5.6	1.09	4.28982	0.48	No	No	Yes	No	5.13761	Moderate PAL	male	Drinks Alcohol 3 or more times/week	No	No	No	0.457617	5	4	No	77.5534	4.35097	No	No	Yes	0.5	Tertiary		15-17	No	No	No		No
579	19	84.1	177.6		No		26.6631	25-29.99 kg/m.sq	111	70	80.3333	103	0.779935								No	No				Moderate PAL	male	Drinks Alcohol 1-2 times/week		No		0.452327							No	Yes		Secondary	Semi/Unskilled	15-17	No	No	No		No
580	18	65.1	175	71.5	No		21.2571	18.5-24.99 kg/m.sq	113	66	69.9	91	0.768132								No	No	No			High PAL	male	Drinks Alcohol 1-2 times/week		No	No	0.399429	4.2	1.8	No	90.5594	4.50601	No	No	No	0.3	Secondary	Highly Skilled	15-17	No	No	No		No
581	18	70.4	185.2	86.2	No		20.5254	18.5-24.99 kg/m.sq	121	64	73	94.7	0.770855								No	No	No			Moderate PAL	male	Drinks Alcohol 1-2 times/week		Yes		0.394168	6.3	1.2	No	79.4942	4.37568	No	No	No	0.3	Primary/All Age	Highly Skilled	15-17	No	No	No		No
582	18	71.7	180.3	62.7	No	No	22.056	18.5-24.99 kg/m.sq	116	61	71.2333	90.5333	0.786819	No	4.8		4.1	1.6	2.39908	0.22	No	No	No	No	2.5625	Moderate PAL	male	Drinks Alcohol 3 or more times/week	No	No		0.395082	3.8	4.8	No	106.397	4.66718	No	No	No	0.6		Semi/Unskilled	0-9	No	No	No		No
583	19	62.9	171.1	82.5	No	Yes	21.4858	18.5-24.99 kg/m.sq	107	78	70.3	90	0.781111	No	4.6	2	2.9	0.87	1.86486	0.36	No	No	No	No	3.33333	High PAL	male	Drinks Alcohol 1-2 times/week	No	No	No	0.410871	6	3.9	No	76.7358	4.34037	No	No	Yes	1.05	Secondary	Skilled	10-14	No	No	No	0.693147	No
584	19	62.6	171.3	100.9	No	No	21.3334	18.5-24.99 kg/m.sq	106	72	70.2	89.4	0.785235	No	4.1		5.7	1.37	4.05018	0.61	No	No	Yes	No	4.16058	Moderate PAL	male	Drinks Alcohol 1-2 times/week	No	No	No	0.409807	3.5	2.1	No	62.8157	4.1402	No	No	No	0.3	Secondary		10-14	No	No	No		No
585	18	69.9	176.1	65.6	No	Yes	22.5402	18.5-24.99 kg/m.sq	102	75	71.8333	96.7333	0.742591	No	4.1	3	4.4	0.79	3.28431	0.71	No	No	No	No	5.56962	High PAL	male	Drinks Alcohol 3 or more times/week	No	No	No	0.407912	7.1	1.9	No	99.3247	4.59839	No	No	Yes	1.9	Tertiary	Highly Skilled	10-14	No	No	No	1.09861	No
586	19	65.2	174.2	79.4	No	No	21.4858	18.5-24.99 kg/m.sq	105	59	69.8	90.8667	0.768158	No	4.5	3.8	2.7	1.19	1.27147	0.52	No	No	No	No	2.26891	Moderate PAL	male	Drinks Alcohol 3 or more times/week	No	No	No	0.400689	3.8	4.9	No	81.1763	4.39662	No	No	Yes	7.95	Secondary	Skilled	0-9	No	No	No	1.335	No
587	19	54.8	171.4	63.7	No	No	18.6534	18.5-24.99 kg/m.sq	113	53	66.6667	86.0333	0.774893	No	4.6	5.6	3.5	1.01	2.22394	0.58	No	Yes	No	No	3.46535	Low PAL	male	Drinks Alcohol 3 or more times/week	No	No	No	0.388954	4.8	3.2	No	99.5573	4.60073	No	Yes	Yes	1.1	Secondary	Skilled	0-9	No	No	No	1.72277	No
588	19	58.5	173.1	66.9	No	Yes	19.5237	18.5-24.99 kg/m.sq	111	70	66.4667	88.5333	0.750753	No	4.4	4.4	4.2	0.9	2.91927	0.83	No	No	No	No	4.66667	High PAL	male	Drinks Alcohol 3 or more times/week	Yes	No	Yes	0.383978	10	2.5	No	95.7354	4.56159	No	Yes	Yes	0.3	Secondary	Highly Skilled	15-17	No	No	No	1.4816	No
589	19	60.1	172.7	85.6	No	No	20.1507	18.5-24.99 kg/m.sq	94	70	72.0333	89.9333	0.800964	Yes	4.8	6.1	5.5	1.07	4.15477	0.6	No	No	Yes	No	5.14019	High PAL	male	Rarely Drinks Alcohol	No	No	Yes	0.417101	4.8	6.6	No	74.6484	4.31279	No	No	No	3.8	Secondary	Skilled	0-9	No	No	No	1.80829	No
590	19	95.4	176.1	85.6	No	No	30.7631	>=30 kg/m.sq	121	69	93.8667	107.967	0.869404	No	4.7	10.2	5.6	1.13	3.98835	1.05	No	No	Yes	No	4.95575	Moderate PAL	male	Drinks Alcohol 3 or more times/week	Yes	Yes		0.53303	4.2	5	No	76.118	4.33228	No	No	Yes	1	Tertiary	Highly Skilled	10-14	No	No	No	2.32239	Yes
591	19	71.2	189.6	98	No	No	19.8063	18.5-24.99 kg/m.sq	119	90	69.9333	95.6	0.73152	No	4.2	2	5.4	1.49	3.61184	0.65	Yes	No	Yes	No	3.62416	High PAL	male	Rarely Drinks Alcohol	No	Yes	No	0.368847	5.5	23.1	No	71.5837	4.27087	No	No	No	1.05	Tertiary	Highly Skilled	10-14	No	No	No	0.693147	No
592	19	72.6	185.1	88.7	No	No	21.1896	18.5-24.99 kg/m.sq	101	49	76.7667	93.4	0.821913	No	4	2	3.9	1.35	2.43073	0.26	No	No	No	No	2.88889	High PAL	male	Drinks Alcohol 3 or more times/week	No	No		0.414731	5.2	2.5	No	77.212	4.34655	No	No	No	1		Skilled	10-14	No	No	No	0.693147	No
593	19	56.9	175.2	73.1	No	No	18.5372	18.5-24.99 kg/m.sq	102	73	66.2667	86.5667	0.765499	No	4.7	3	3.8	1.18	2.43651	0.4	No	No	No	No	3.22034	Low PAL	male	Drinks Alcohol 1-2 times/week	No	No	Yes	0.378234	3.7	9.5	No	88.6785	4.48502	No	No	No	0.3		Skilled	15-17	No	No	No	1.09861	No
594	19	62.6	180.9	85.6	No	No	19.1292	18.5-24.99 kg/m.sq	112	61	66.2	90.4333	0.732031	No	5.1	2.8	3.3	1.27	1.87404	0.34	No	No	No	Yes	2.59843	Moderate PAL	male	Drinks Alcohol 3 or more times/week	No	No	No	0.365948	5	31.7	Yes	78.1928	4.35918	Yes	Yes	Yes	0.3		Semi/Unskilled	0-9	No	No	No	1.02962	No
595	20	68.7	185.5		No		19.965	18.5-24.99 kg/m.sq	101	49	69.9667	90.9667	0.769146		4.7	6.5	5.6			0.53	No	Yes	Yes	No		Moderate PAL	male	Drinks Alcohol 3 or more times/week	No	No	No	0.377179	5.5	4.7	No				Yes	No	0.4	Tertiary	Highly Skilled	10-14	No	No	No	1.8718	No
596	19	62.5	174.4	73.1	No	Yes	20.5488	18.5-24.99 kg/m.sq	108	69	66.6	89.0667	0.747754	No	4.3	2	3.7	0.99	2.55404	0.34	No	No	No	No	3.73737	Low PAL	male	Rarely Drinks Alcohol	No	No	No	0.381881	4.5	5.9	No	88.2736	4.48044	No	No	Yes	4.3	Secondary	Highly Skilled	15-17	No	No	No	0.693147	No
597	18	86.1	180.3	74.5	No	No	26.4857	25-29.99 kg/m.sq	124	50	86.8	103.4	0.839458	No	5.6	9.3	3.6	1.08	2.04294	1.04	No	No	No	Yes	3.33333	High PAL	male	Drinks Alcohol 1-2 times/week	Yes	Yes	No	0.48142	5.3	2.2	No	89.545	4.49474	No	No	No	1	Secondary	Skilled	10-14	No	No	No	2.23001	No
598	19	64.5	167.1	59.8	No	No	23.0997	18.5-24.99 kg/m.sq	123	81	73.6	93.6333	0.786045	No	4.2		4.6	1.38	3.05028	0.37	No	No	No	No	3.33333	Low PAL	male	Drinks Alcohol 1-2 times/week	No	Yes		0.440455	3.4	5.3	No	103.39	4.6385	No	No	No	0.3	Secondary	Highly Skilled	15-17	No	No	No		No
599	19	59.6	172.7	107.4	No	No	19.983	18.5-24.99 kg/m.sq	110	66	67.0333	88.9667	0.753466	No	4.3	2	5.3	2.14	2.93064	0.5	No	No	Yes	No	2.47664	Moderate PAL	male	Drinks Alcohol 1-2 times/week	No	No	Yes	0.388149	9.9	2.5	No	59.4963	4.08591	Yes	No	No	0.3	Secondary	Skilled	10-14	No	No	No	0.693147	No
600	19	77.9	172.6	59.8	No	Yes	26.149	25-29.99 kg/m.sq	117	60	78.3667	98.5	0.795601	No	4.5		3.5	0.93	2.27642	0.64	No	No	No	No	3.76344	Moderate PAL	male	Drinks Alcohol 1-2 times/week	No	No	No	0.454036	4.7	10.8	No	106.793	4.67089	No	No	No	1.5	Secondary	Semi/Unskilled	10-14	No	No	No		No
601	19	74	178.2	70	No	Yes	23.3032	18.5-24.99 kg/m.sq	114	64	77.0667	94	0.819858	No	4.4	3.3	3.5	0.88	2.46404	0.34	No	No	No	No	3.97727	High PAL	male	Rarely Drinks Alcohol	No	No	No	0.432473	4	3.3	No	94.1914	4.54533	No	Yes	No	2.9	Tertiary	Skilled	0-9	No	No	No	1.19392	No
602	19	67.7	183.8	79.4	No	Yes	20.04	18.5-24.99 kg/m.sq	118	71	72.5	93.3	0.777063	No	4.7	2	4.7	0.88	3.36587	0.99	No	No	No	No	5.34091	High PAL	male	Rarely Drinks Alcohol	Yes	No		0.39445	4.3	7.4	No	85.6499	4.45027	No	No	No	0.3	Primary/All Age	Semi/Unskilled	0-9	No	No	No	0.693147	No
603	18	108.8	176.5	68.6	Yes	Yes	34.9252	>=30 kg/m.sq	120	62	95.4667	116.5	0.819456	No	4.2	36.3	4.3	0.97	3.03184	0.65	No	No	No	No	4.43299	Moderate PAL	male	Never Drank Alcohol	No	Yes	No	0.540888	7.5	1.5	No	95.1968	4.55595	No	No			Tertiary	Highly Skilled	10-14	No	No	No	3.59182	Yes
604	18	68.7	171.2	95	No	No	23.4395	18.5-24.99 kg/m.sq	104	69	73.1333	96	0.761806	No	4.5	8.1	5.3	1.18	3.85395	0.58	No	Yes	Yes	No	4.49153	Low PAL	male	Drinks Alcohol 1-2 times/week	No	No	Yes	0.427181	4.7	10.7	No	66.6779	4.19987	No	Yes	No		Secondary	Skilled	0-9	No	No	No	2.09186	No
605	18	70.7	177.6	62.7	No	No	22.4147	18.5-24.99 kg/m.sq	125	79	71.9	95.4	0.753669	No	4.4	5.9	3.4	1.14	2.05817	0.44	No	No	No	No	2.98246	High PAL	male	Rarely Drinks Alcohol	No	Yes	Yes	0.404842	3.7	2.5	No	104.804	4.65209	No	No	No	0.3	Secondary	Skilled	10-14	No	No	No	1.77495	No
606	19	64.5	168.6	85.6	No	No	22.6905	18.5-24.99 kg/m.sq	105	70	76.0667	94.2	0.807502	No	4.7	6.1	3.7	1.2	2.31193	0.41	No	No	No	No	3.08333	High PAL	male	Never Drank Alcohol	No	No		0.451166	5.2	7.7	No	72.8762	4.28876	No	No		0.8			10-14	No	No	No	1.80829	No
607	19	64.6	166	98	No	Yes	23.4432	18.5-24.99 kg/m.sq	117	76	68.5333	91.5	0.748998	No	4.5	2	3.6	0.99	2.47239	0.3	No	No	No	No	3.63636	Moderate PAL	male	Rarely Drinks Alcohol	No	No	Yes	0.412851	4.7	27.9	No	62.6735	4.13794	No	No	No	0.3	Secondary	Skilled	15-17	No	No	No	0.693147	No
608	19	68.7	181	101.1	No	No	20.9701	18.5-24.99 kg/m.sq	123	84	71.6	94	0.761702	No	5.4	7.2	3.6	1.41	2.01569	0.38	No	No	No	Yes	2.55319	Moderate PAL	male	Drinks Alcohol 1-2 times/week	No	Yes	Yes	0.39558	6.5	3	No	66.2413	4.19331	No	Yes	No	1.95	Primary/All Age	Semi/Unskilled	0-9	No	No	No	1.97408	No
609	19	81.8	176.5	70	No	No	26.2581	25-29.99 kg/m.sq	106	72	85.4333	102.733	0.831603	Yes	4.5	8.3	6	1.22	4.30294	1.04	No	No	Yes	No	4.91803	High PAL	male	Drinks Alcohol 1-2 times/week	Yes	No	Yes	0.484042	3.8	1.1	No	93.2929	4.53574	No	No	No	1.3	Tertiary	Highly Skilled	15-17	No	No	No	2.11626	No
610	18	79.1	182.4	77.4	No	No	23.7753	18.5-24.99 kg/m.sq	126	69	78.1	99.6	0.784137	No	4.4	5.9	2.8	1.28	1.33651	0.4	No	No	No	No	2.1875	High PAL	male	Drinks Alcohol 3 or more times/week	No	Yes	No	0.42818	3.8	4	No	87.1938	4.46813	No	No	Yes	0.55		Semi/Unskilled	0-9	No	No	No	1.77495	No
611	19	66.3	180.5	101.2	No	No	20.3498	18.5-24.99 kg/m.sq	105	67	68.4333	91.4	0.748724	No	4.1	4.1	4.8	1.25	3.33899	0.46	No	No	No	No	3.84	High PAL	male	Rarely Drinks Alcohol	No	No	Yes	0.379132	5.1	24.9	No	65.9931	4.18955	No	No	Yes	0.3	Tertiary	Skilled	10-14	No	No	No	1.41099	No
612	19	54.1	162.4	60.6	No	No	20.5128	18.5-24.99 kg/m.sq	119	78	65.3	85.8	0.761072	No	5.8	2.3	2.9	1.01	1.7845	0.23	No	No	No	Yes	2.87129	Moderate PAL	male	Drinks Alcohol 3 or more times/week	No	No		0.402094	6.3	4.1	No	99.1551	4.59669	No	Yes	Yes	0.3	Secondary	Skilled	0-9	No	No	No	0.832909	No
613	19	80.8	185.1	88.7	No	Yes	23.583	18.5-24.99 kg/m.sq	123	75	81.6333	97.7	0.835551	No	4.7	3.4	4.8	0.98	2.96679	1.86	No	No	No	No	4.89796	Low PAL	male	Drinks Alcohol 1-2 times/week	Yes	Yes	No	0.441023	6.2	5	No	77.212	4.34655	No	No	No	0.45	Tertiary	Highly Skilled	0-9	No	No	No	1.22378	No
614	19	81.9	194.2	70	No	No	21.7163	18.5-24.99 kg/m.sq	118	74	79.5333	92.2667	0.861994	No	4.6	5.5	5	1.11	3.66982	0.48	No	No	No	No	4.5045	Moderate PAL	male	Drinks Alcohol 3 or more times/week	No	No		0.409543	5.1	17.7	No	102.649	4.63131	No	No	Yes	0.3		Skilled	10-14	No	No	No	1.70475	No
615	19	83.7	168.1	66.9	No	No	29.6203	25-29.99 kg/m.sq	111	71	88	108.133	0.81381	No	4.8	2.3	4.6	1.35	3.05275	0.43	No	Yes	No	No	3.40741	High PAL	male	Drinks Alcohol 3 or more times/week	No	No		0.523498	6.5	2.5	No	92.9701	4.53228	No	Yes	No	4.55	Primary/All Age	Skilled	15-17	No	No	No	0.832909	No
616	19	77	183.1	98	No		22.9675	18.5-24.99 kg/m.sq	137	62	78.4	96.5	0.812435		5.4	8.4	3.5			0.29	No	No	No	Yes		Moderate PAL	male	Rarely Drinks Alcohol	No	Yes	No	0.428181	6.8	2.5	No	69.1296	4.23598	No	No	Yes		Secondary	Skilled	0-9	No	No	No	2.12823	No
617	20	77.9	199.6	85.6	No		19.5531	18.5-24.99 kg/m.sq	125	89	78.3	95.1	0.823344								No	No	No			Moderate PAL	male	Drinks Alcohol 1-2 times/week		Yes	Yes	0.392285	4.7	2.5	No	86.2757	4.45755	No	Yes	Yes	0.3		Skilled	10-14	No	No	No		No
618	18	65.5	182.1	80.3	No	Yes	19.7525	18.5-24.99 kg/m.sq	99	54	73.8	91.9	0.803047	No	4.4	7.7	3.7	1	2.49817	0.44	No	No	No	No	3.7	Moderate PAL	male	Drinks Alcohol 1-2 times/week	No	No		0.405272	5.6	1.3	No	83.9066	4.4297	No	No	Yes		Tertiary	Skilled	15-17	No	No	No	2.04122	No
619	18	59.7	179.8	74.5	No	Yes	18.4669	<18.5 kg/m.sq.	114	75	67.7	89.55	0.756002	No	4.4	3.3	4.2	0.95	3.08028	0.37	No	No	No	No	4.42105	High PAL	male	Drinks Alcohol 3 or more times/week	No	No	No	0.376529	3.9	4.3	No	89.2966	4.49196	No	No	No	0.3	Secondary	Skilled	0-9	No	No	No	1.19392	No
620	19	67.6	173	35.6	No	No	22.5868	18.5-24.99 kg/m.sq	119	63	75.6667	95.9667	0.788468	No	4.4	5.9	4.7	1.41	2.56523	1.58	No	Yes	No	No	3.33333	Moderate PAL	male	Drinks Alcohol 3 or more times/week	Yes	No	No	0.43738	7.9	5.8	No	179.803	5.19186	No	Yes	No	0.5	Secondary	Skilled	0-9	No	No	No	1.77495	No
621	20	86.8	184.8	88.7	No	Yes	25.4165	25-29.99 kg/m.sq	112	73	85.9333	105.4	0.815307	No	5.7	8.5	3.6	0.98	2.23927	0.83	No	No	No	Yes	3.67347	Moderate PAL	male	Drinks Alcohol 3 or more times/week	Yes	No	No	0.465007	9.2	5.1	No	77.0868	4.34493	No	Yes	No	0.3		Skilled	10-14	No	No	No	2.14007	No
622	20	62.6	184.2	79.4	No	No	18.4499	<18.5 kg/m.sq.	112	70	69.6667	87.6333	0.794979	No	5.1	2.6	4.4	1.01	3.09642	0.64	No	No	No	Yes	4.35644	Low PAL	male	Never Drank Alcohol	No	No	No	0.378212	6.2	2.5	No	85.8363	4.45244	No	No		0.3	Secondary	Skilled	10-14	No	No	No	0.955511	No
623	19	64.8	182	70	No	Yes	19.5629	18.5-24.99 kg/m.sq	110	63	69.0667	90.3667	0.764294	No	4.3	2.9	3.4	0.93	2.19936	0.59	No	No	No	No	3.65591	Moderate PAL	male	Drinks Alcohol 1-2 times/week	No	No	No	0.379487	5.6	1.7	No	96.2	4.56643	No	No	No	0.4	Secondary	Skilled	15-17	No	No	No	1.06471	No
624	20	64.4	173.1	79.4	No	Yes	21.4927	18.5-24.99 kg/m.sq	133	81	73.0667	93.7	0.779794	No	4.9	7.3	3.4	0.9	2.3211	0.39	No	No	No	No	3.77778	Moderate PAL	male	Drinks Alcohol 1-2 times/week	No	Yes	No	0.422107	7.3	19.4	No	80.6637	4.39029	No	No	No	1.95	Secondary	Skilled	0-9	No	No	No	1.98787	No
625	19	69	180.6	63.8	No	No	21.155	18.5-24.99 kg/m.sq	118	69	74	91.2	0.811404	No	5.3	4.4	4.5	1.27	2.95018	0.61	No	No	No	Yes	3.54331	Moderate PAL	male	Rarely Drinks Alcohol	No	No	No	0.409745	6	6.8	No	104.737	4.65145	No	No	No	0.3	Tertiary	Skilled	10-14	No	No	No	1.4816	No
626	19	58.4	175.5	94.9	No	No	18.9609	18.5-24.99 kg/m.sq	110	70	70.5	87	0.810345	No	5	6.4	4.4	1.49	2.60266	0.67	No	No	No	Yes	2.95302	Low PAL	male	Drinks Alcohol 1-2 times/week	No	No	No	0.401709	7.2	3.6	No	68.4247	4.22573	No	No	Yes	0.3	Tertiary	Skilled	10-14	No	No	No	1.8563	No
627	19	56.4	180.5	85.6	No	No	17.3111	<18.5 kg/m.sq.	120	70	63.8	90.9	0.70187	No	4.8		5.2	1.22	3.75982	0.48	No	No	No	No	4.26229	Moderate PAL	male	Never Drank Alcohol	No	Yes		0.353463	6.9	1	No	78.0199	4.35696	No	No		0.3	Tertiary	Highly Skilled	15-17	No	No	No		No
628	19	73.6	176.4	116.8	No	No	23.6527	18.5-24.99 kg/m.sq	136	81	74.4	98.4	0.756098	No	5	4.7	4.1	1.78	2.16404	0.34	No	No	No	Yes	2.30337	High PAL	male	Drinks Alcohol 3 or more times/week	No	Yes	Yes	0.421769	3.7	13.8	No	55.8801	4.02321	Yes	Yes	Yes	0.3	Secondary	Highly Skilled	10-14	No	No	No	1.54756	No
629	18	80.9	176.4	39.2	No	No	25.9987	25-29.99 kg/m.sq	119	50	87.7	109.167	0.803359	No	4.8	11.7	3.8	1.25	2.12339	0.93	No	Yes	No	No	3.04	Moderate PAL	male	Drinks Alcohol 3 or more times/week	Yes	No	Yes	0.497166	2.9	3.9	No	166.5	5.115	No	Yes	Yes	1.9	Tertiary	Highly Skilled	15-17	No	No	No	2.45959	Yes
630	19	60.9	179	98	No	No	19.0069	18.5-24.99 kg/m.sq	108	71	67.6333	88.4667	0.764506	No	4.1	2.2	4.8	1.19	3.35771	0.55	No	No	No	No	4.03361	Moderate PAL	male	Rarely Drinks Alcohol	No	No	Yes	0.37784	4	11	No	67.5816	4.21334	No	No	No	0.3	Secondary	Skilled	10-14	No	No	No	0.788457	No
631	18	67.2	173.9	77.4	No	No	22.2213	18.5-24.99 kg/m.sq	132	61	72.1667	90.4	0.798304	No	5.1	4.4	4.3	1.1	2.94771	0.55	No	No	No	Yes	3.90909	High PAL	male	Rarely Drinks Alcohol	No	Yes	No	0.414989	4.5	3.3	No	83.1305	4.42041	No	No	No	2.2	Secondary		15-17	No	No	No	1.4816	No
632	19	59.2	168.7	60.7	No	No	20.8014	18.5-24.99 kg/m.sq	116	73	68.5	85.4	0.802108	No	4.3	2	2.6	1.07	1.15385	0.82	No	No	No	No	2.42991	High PAL	male		Yes	No	No	0.406046	4.1	2.5	No	102.832	4.6331	No	Yes		2	Primary/All Age		10-14	No	No	No	0.693147	No
633	18	52.7	179.5		No	Yes	16.3562	<18.5 kg/m.sq.	107	32	65	79.9	0.813517	No	4.3	2	3.3	0.46	2.42716	0.9	No	No	No	No	7.17391	High PAL	male	Never Drank Alcohol	Yes	No	No	0.362117	4.6	6.3	No				Yes		3	Secondary	Semi/Unskilled	15-17	No	No	No	0.693147	No
634	19	70.9	183.6	88.7	No	Yes	21.033	18.5-24.99 kg/m.sq	122	80	74.5333	91.4333	0.815166	No	4.8	3.4	3.2	0.86	1.89963	0.96	No	No	No	No	3.72093	High PAL	male	Drinks Alcohol 1-2 times/week	Yes	Yes	Yes	0.405955	5	10.3	No	76.5863	4.33842	No	No	No		Secondary		10-14	No	No	No	1.22378	No
635	19	76.8	182.6	98	No	No	23.0335	18.5-24.99 kg/m.sq	115	66	80.3	93.6667	0.857295	No	5.1		3.9	1.24	2.43064	0.5	No	No	No	Yes	3.14516	Moderate PAL	male	Drinks Alcohol 1-2 times/week	No	No	Yes	0.439759	4.7			68.9408	4.23325		No	No	0.65	Secondary	Skilled	0-9	No	No	No		No
636	19	97.6	179.7	107.4	Yes	No	30.2241	>=30 kg/m.sq	130	53	94.9	108.7	0.873045	No	4.5		3.8	1.11	2.41018	0.61	No	No	No	No	3.42342	Moderate PAL	male	Drinks Alcohol 3 or more times/week	No	Yes	Yes	0.528102	4.8	89.7	Yes	61.9078	4.12565	Yes	No	No	0.6		Semi/Unskilled	10-14	No	No	No		No
637	18	57.9	165	115.6	No	No	21.2672	18.5-24.99 kg/m.sq	115	59	68.4	86.9333	0.78681	No	3.6	2	3.7	1.18	2.27688	0.53	No	No	No	No	3.13559	Moderate PAL	male	Drinks Alcohol 3 or more times/week	No	No	No	0.414545	3.6	30.7	Yes	52.8114	3.96673	Yes	No	Yes	1.55	Secondary	Skilled	10-14	No	No	No	0.693147	No
638	19	96.5	188.6	68.6	No	No	27.1296	25-29.99 kg/m.sq	111	81	92.2667	108	0.854321	No	4.3		5.2	1.18	3.61174	0.89	No	No	No	No	4.40678	Low PAL	male	Drinks Alcohol 1-2 times/week	Yes	Yes	Yes	0.489219	6	1	No	101.723	4.62225	No	No	Yes	2.1	Secondary	Skilled	0-9	No	No	No		No
639	18	84.1	189.7	115.6	No	Yes	23.3701	18.5-24.99 kg/m.sq	100	70	80.7	95.2	0.847689	No	4.9	5.3	4.5	0.75	3.36927	0.83	No	No	No	No	6	High PAL	male	Drinks Alcohol 1-2 times/week	Yes	No		0.425409	6.4	4.2	No	60.7171	4.10623	No	No	Yes	0.55	Tertiary	Highly Skilled	10-14	No	No	No	1.66771	No
640	18	68.4	177.9	80.3	No	No	21.6125	18.5-24.99 kg/m.sq	111	62	74.8	97.7	0.765609	No	4.6	5.5	3.9	1.72	1.76716	0.9	No	No	No	No	2.26744	Moderate PAL	male	Drinks Alcohol 3 or more times/week	Yes	No	Yes	0.420461	3.1	3.1	No	81.9714	4.40637	No	Yes	No	0.3	Primary/All Age	Semi/Unskilled	0-9	No	No	No	1.70475	No
641	19	70.9	181.4	79.4	No	No	21.5463	18.5-24.99 kg/m.sq	109	67	69.8667	93.9333	0.74379	No	5.2	2.8	3.5	1.06	2.30239	0.3	No	No	No	Yes	3.30189	Low PAL	male	Drinks Alcohol 3 or more times/week	No	No	Yes	0.385153	4.7	2.8	No	84.5315	4.43712	No	Yes	Yes	0.3	Secondary	Skilled	10-14	No	No	No	1.02962	No
642	19	68.7	174.9	54.5	No	Yes	22.4583	18.5-24.99 kg/m.sq	123	59	76.0333	93.4667	0.813481	No	4.8	6	3.6	0.83	2.4489	0.7	No	No	No	No	4.33735	High PAL	male	Drinks Alcohol 3 or more times/week	No	Yes	Yes	0.434725	5.2	47	Yes	118.739	4.77693	Yes	No	Yes	0.35		Skilled	0-9	No	No	No	1.79176	No
643	19	72.8	171.1	73.1	No	No	24.8675	18.5-24.99 kg/m.sq	115	68	75.4667	92.5667	0.815268	No	5.9	6.2	4.7	1.55	2.87018	0.61	No	No	No	Yes	3.03226	Moderate PAL	male	Drinks Alcohol 3 or more times/week	No	No		0.441068	8.3	1.5	No	86.6033	4.46134	No	Yes	Yes	1.7	Secondary		10-14	No	No	No	1.82455	No
644	19	83.7	185.6	66.9	No	No	24.2979	18.5-24.99 kg/m.sq	115	74	75.8667	98.8333	0.767622	No	4.7	2.9	3.6	1.08	2.20807	0.68	No	No	No	No	3.33333	High PAL	male	Drinks Alcohol 1-2 times/week	No	No	No	0.408764	6.7	6.2	No	102.649	4.63131	No	No		1.1	Primary/All Age	Skilled	10-14	No	No	No	1.06471	No
645	19	57.4	171.5	85.6	No	No	19.5157	18.5-24.99 kg/m.sq	96	59	69.6667	86	0.810077	No	5.2	2.5	4.5	1.7	2.52936	0.59	No	No	No	Yes	2.64706	High PAL	male	Never Drank Alcohol	No	No	Yes	0.40622	6.2	2.5	No	74.1297	4.30582	No	No		0.3	Secondary	Skilled	10-14	No	No	No	0.916291	No
646	18	64.1	177.5	74.5	No	No	20.3452	18.5-24.99 kg/m.sq	124	63	71	86	0.825581	No	5	4.1	4.7	1.09	3.3256	0.62	No	No	No	Yes	4.31193	High PAL	male	Drinks Alcohol 3 or more times/week	No	Yes	Yes	0.4	6.2	4	No	88.1544	4.47909	No	Yes	No	0.3		Skilled	0-9	No	No	No	1.41099	No
647	18	73.4	179		No		22.9081	18.5-24.99 kg/m.sq	100	66	71.7	92.8	0.772629								No	No				High PAL	male	Rarely Drinks Alcohol		No	No	0.400559							No	No		Secondary	Skilled	0-9	No	No	No		No
648	20	67.9	176.4	79.4	No	No	21.8209	18.5-24.99 kg/m.sq	113	65	72.5	95	0.763158	No	4.1	2	3.4	1.1	2.13945	0.35	No	Yes	No	No	3.09091	High PAL	male	Drinks Alcohol 3 or more times/week	No	No		0.410998	5	2.5	No	82.2015	4.40917	No	Yes	Yes	0.3	Secondary	Skilled	10-14	No	No	No	0.693147	No
649	19	61.2	173.6	63.7	No	No	20.3073	18.5-24.99 kg/m.sq	124	90	68.3	87	0.785057	No	5.4	3.7	4.3	1.09	2.8889	0.7	Yes	No	No	Yes	3.94495	Moderate PAL	male	Drinks Alcohol 1-2 times/week	No	Yes	Yes	0.393433	4.4	9.9	No	100.835	4.61349	No	Yes	No	0.3	Secondary	Semi/Unskilled	0-9	No	No	No	1.30833	No
650	18	68.7	184.5	68.6	No	Yes	20.182	18.5-24.99 kg/m.sq	102	70	71.9	90.9667	0.790399	No	4.9		4.4	0.99	3.0889	0.7	No	No	No	No	4.44444	High PAL	male	Rarely Drinks Alcohol	No	No	Yes	0.389702	5	1.3	No	99.5117	4.60028	No	No	No	0.4	Secondary	Semi/Unskilled	10-14	No	No	No		No
651	18	65.7	178.8	92.1	No	No	20.5509	18.5-24.99 kg/m.sq	105	55	66.8	86.7	0.770473	No	4.4	4.7	4.9	1.49	3.11642	0.64	No	No	No	No	3.28859	High PAL	male	Drinks Alcohol 3 or more times/week	No	No	Yes	0.373602	4.5	6	No	71.8306	4.27431	No	No	No	0.3	Primary/All Age	Highly Skilled	10-14	No	No	No	1.54756	No
652	18	114.2	183.2	103.9	Yes	No	34.0263	>=30 kg/m.sq	158	65	108.1	116.4	0.928694	No	5.7	20.9	4.4	1.2	2.91101	0.63	Yes	No	No	Yes	3.66667	Moderate PAL	male	Rarely Drinks Alcohol	No	Yes	Yes	0.590065	5.3	4.4	No	65.2397	4.17807	No	No	No	1	Tertiary	Skilled	10-14	Yes	No	No	3.03975	Yes
653	18	70.2	179.4	83.3	No	No	21.8118	18.5-24.99 kg/m.sq	111	48	70.9	92.5667	0.765934	Yes		2	7.3	2.03	4.99018	0.61	No	No	Yes		3.59606	Moderate PAL	male	Drinks Alcohol 1-2 times/week	No	No	No	0.395206	7.4	1.1	No	79.6855	4.37809	No	Yes	No	0.55	Secondary	Semi/Unskilled	10-14	No	No	No	0.693147	No
654	19	67	178	45.1	No	No	21.1463	18.5-24.99 kg/m.sq	113	52	72.8667	93.4667	0.779601	No	4.9	4.8	3.7	1.42	1.80752	1.03	No	No	No	No	2.60563	Low PAL	male	Drinks Alcohol 3 or more times/week	Yes	No	No	0.409363	4.4	2.5	No	146.031	4.98382	No	Yes	No	0.3	Secondary	Semi/Unskilled	10-14	No	No	No	1.56862	No
655	18	59	172.3	62.7	No	No	19.8738	18.5-24.99 kg/m.sq	110	69	73.4667	84.1	0.873563	Yes	5.5	9.8	5.7	1.02	4.28092	0.87	No	No	Yes	Yes	5.58824	Moderate PAL	male	Drinks Alcohol 3 or more times/week	Yes	No	No	0.426388	7.4	6	No	101.676	4.62179	No	No	Yes	2.45	Secondary		10-14	No	No	No	2.28238	Yes
656	19	97.7	174		Yes		32.2698	>=30 kg/m.sq	125	77	96.0667	109.6	0.876521								No	No				High PAL	male	Never Drank Alcohol		Yes	No	0.552107							No			Secondary	Skilled	15-17	No	No	No		No
657	19	77.4	187.3		No		22.063	18.5-24.99 kg/m.sq	115	81	74.6	94.9667	0.785539								No	No				High PAL	male	Drinks Alcohol 3 or more times/week		Yes	Yes	0.398291							No	No			Semi/Unskilled	10-14	No	No	No		No
658	18	60.6	184.9		No		17.7255	<18.5 kg/m.sq.	118	74	65.6	84.5	0.776331								No	Yes				Low PAL	male	Rarely Drinks Alcohol		No	Yes	0.354786							No	Yes		Secondary	Semi/Unskilled	10-14	No	No	No		No
659	19	51.9	178.4	66.9	No	No	16.3071	<18.5 kg/m.sq.	94	70	62.4333	83.3667	0.7489	No	4.2	2	3.3	1.14	2.00862	0.33	No	No	No	No	2.89474	Low PAL	male	Rarely Drinks Alcohol	No	No	No	0.349963	6.6	27.4	No	98.6667	4.59175	No	No	No	0.6		Skilled	0-9	No	No	No	0.693147	No
660	20	94.5	177.1	91.8	No	No	30.1297	>=30 kg/m.sq	138	85	89.6	114.3	0.783902	No	5.6	3.7	3.8	1.18	2.33101	0.63	No	No	No	Yes	3.22034	High PAL	male	Drinks Alcohol 3 or more times/week	No	Yes	Yes	0.505929	5.6	2.5	No	71.3802	4.26802	No	No	Yes	8.3	Secondary	Semi/Unskilled	10-14	No	No	No	1.30833	No
661	18	63.1	173.7	71.5	No	No	20.9136	18.5-24.99 kg/m.sq	110	57	71.6	88.1	0.812713	No	4.5		3.5	1.08	2.19064	0.5	No	No	No	No	3.24074	High PAL	male	Rarely Drinks Alcohol	No	No	No	0.412205	5.1	1.5	No	89.8867	4.49855	No	No	No	0.3	Secondary	Semi/Unskilled	10-14	No	No	No		No
662	18	74	180.4		No		22.7383	18.5-24.99 kg/m.sq	113	59	78.1	91.5667	0.85293								No	No				High PAL	male	Never Drank Alcohol		No		0.432927							No			Tertiary	Highly Skilled	10-14	No	No	No		No
663	19	58.1	167.8	113.6	No	No	20.6344	18.5-24.99 kg/m.sq	121	69	68.4333	88.7333	0.771225	No	5.4	6.3	4.8	1.27	3.25477	0.6	No	Yes	No	Yes	3.77953	High PAL	male	Drinks Alcohol 1-2 times/week	No	Yes	Yes	0.407827	4	32.3	Yes	54.6532	4.00101	Yes	Yes	No	0.3	Tertiary		15-17	No	No	No	1.84055	No
664	20	64.2	175.5		No		20.844	18.5-24.99 kg/m.sq	115	69	68.5667	88.5333	0.774473		5		2.9			0.48	No	No	No	Yes		Moderate PAL	male		No	No	No	0.390693	12.7	2.5	No						1.55	Secondary	Semi/Unskilled	10-14	No	No	No		No
665	19	92.9	181.1	66.9	No	No	28.3256	25-29.99 kg/m.sq	126	74	91.6667	99.7667	0.91881	No	5.8	6	3.1	1.04	1.85358	0.45	No	Yes	No	Yes	2.98077	High PAL	male	Drinks Alcohol 3 or more times/week	No	Yes	Yes	0.506166	6.9	3.6	No	100.16	4.60677	No	Yes	No	0.55	Secondary	Highly Skilled	10-14	No	No	No	1.79176	No
666	18	77.8	185.1	106.8	No	Yes	22.7074	18.5-24.99 kg/m.sq	107	60	73.9667	100.467	0.736231	No	3.6	2.5	3.9	0.9	2.77982	0.48	No	No	No	No	4.33333	Moderate PAL	male	Rarely Drinks Alcohol	No	No	Yes	0.399604	3.7	5.5	No	64.1264	4.16086	No	No	No	0.3		Skilled	0-9	No	No	No	0.916291	No
667	18	55.6	169.5	53.9	No	Yes	19.3524	18.5-24.99 kg/m.sq	104	57	65.3	83.3	0.783914	No	4.6	2	4	0.93	2.7856	0.62	No	No	No	No	4.30108	Low PAL	male	Drinks Alcohol 3 or more times/week	No	No	No	0.385251	5.8	38.5	Yes	116.354	4.75664	Yes	Yes	Yes	0.3	Secondary	Semi/Unskilled	10-14	No	No	No	0.693147	No
668	19	60.1	172.2	76.2	No	Yes	20.2679	18.5-24.99 kg/m.sq	118	70	69	90	0.766667	No	4.6	2.1	4.1	0.95	2.86101	0.63	No	Yes	No	No	4.31579	High PAL	male	Drinks Alcohol 3 or more times/week	No	No	No	0.400697	6.6	9.4	No	83.6142	4.42621	No	Yes	Yes	0.95	Secondary	Semi/Unskilled	10-14	No	No	No	0.741937	No
669	18	64	184.5	56.8	No	No	18.8013	18.5-24.99 kg/m.sq	127	89	71.5333	90.8	0.787812	No	5.1		4.9	1.59	2.99807	0.68	No	No	No	Yes	3.08176	Moderate PAL	male	Rarely Drinks Alcohol	No	Yes		0.387715	5.5	2	No	120.185	4.78903	No	Yes	No	0.3	Secondary	Skilled	10-14	No	No	No		No
670	19	61	176.5	73.1	No	Yes	19.5812	18.5-24.99 kg/m.sq	104	65	67.1333	86.5	0.776108	No	4.6	2	3.8	0.86	2.60055	0.74	No	Yes	No	No	4.4186	Moderate PAL	male	Drinks Alcohol 3 or more times/week	No	No		0.380359	3.6	6.6	No	89.3365	4.49241	No	No	No	1.25		Semi/Unskilled	10-14	No	No	No	0.693147	No
671	19	138.1	176.5	66.8	Yes	Yes	44.3307	>=30 kg/m.sq	122	69	132.367	134.833	0.981706	No	4.4	7.1	3.8	0.84	2.82697	0.29	No	No	No	No	4.52381	Moderate PAL	male	Rarely Drinks Alcohol	No	Yes	Yes	0.749953	5	2.5	No	97.762	4.58254	No	No	No	3.6	Secondary	Skilled	10-14	No	No	No	1.96009	No
672	20	59.5	180	88.7	No	No	18.3642	<18.5 kg/m.sq.	97	75	66.7667	87	0.767433	No	4.8	2	3.9	1.14	2.45266	0.67	No	No	No	No	3.42105	Low PAL	male	Drinks Alcohol 3 or more times/week	No	No	No	0.370926	5.8	2.5	No	75.0846	4.31861	No	Yes	No	0.85	Secondary		10-14	No	No	No	0.693147	No
673	19	69.6	176.3	101.1	No	Yes	22.3926	18.5-24.99 kg/m.sq	119	57	73.0333	93.8	0.778607	No	4.7	5.8	3.5	0.84	2.24257	0.91	No	Yes	No	No	4.16667	High PAL	male	Drinks Alcohol 3 or more times/week	Yes	No	No	0.414256	5	2.5	No	64.5213	4.167	No		Yes	0.4		Skilled	10-14	No	No	No	1.75786	No
674	19	106.1	191.4	79.3	No	Yes	28.9622	25-29.99 kg/m.sq	113	73	90.2667	112.067	0.805473	No	4.3	9.6	3.7	0.98	2.50899	0.46	No	No	No	No	3.77551	Low PAL	male	Rarely Drinks Alcohol	No	No	Yes	0.471613	3.5	8	No	89.3039	4.49205	No	No	No	2.7	Secondary	Skilled	10-14	No	No	No	2.26176	No
675	19	67.3	173.8	85.6	No	Yes	22.28	18.5-24.99 kg/m.sq	115	53	75.1333	91.1333	0.824433	No	4.8	3.8	4.1	0.92	2.80844	0.81	No	No	No	No	4.45652	High PAL	male	Drinks Alcohol 3 or more times/week	Yes	No	Yes	0.432298	6.7	2.5	No	75.1238	4.31914	No	No	Yes	0.3	Tertiary	Highly Skilled	15-17	No	No	No	1.335	No
676	20	55	157.1	94.9	No	No	22.2849	18.5-24.99 kg/m.sq	112	72	67	87.4	0.76659	No	4.9	4.4	4.4	1.26	2.84184	0.65	No	Yes	No	No	3.49206	Moderate PAL	male	Drinks Alcohol 1-2 times/week	No	No	No	0.42648	6	5	No	61.2508	4.11498	No	Yes	Yes	0.6		Semi/Unskilled	10-14	No	No	No	1.4816	No
677	19	74.4	189.3	82.5	No	No	20.7621	18.5-24.99 kg/m.sq	123	84	76.8	93.5	0.82139	No	4.4	5.1	4	1.27	2.52358	0.45	No	No	No	No	3.14961	Moderate PAL	male	Drinks Alcohol 3 or more times/week	No	Yes	Yes	0.405705	6.4	3.7	No	84.8982	4.44145	No	Yes	No	0.45	Secondary	Skilled	0-9	No	No	No	1.62924	No
678	19	64.8	168.5	91.8	No	No	22.8231	18.5-24.99 kg/m.sq	138	78	75.4	91.7333	0.821948	No	4.9	6.3	4.1	1.38	2.28881	0.94	No	Yes	No	No	2.97101	High PAL	male	Drinks Alcohol 3 or more times/week	Yes	Yes		0.447478	5.7	2.5	No	67.9139	4.21824	No	No	Yes	0.6	Secondary	Semi/Unskilled	10-14	No	No	No	1.84055	No
679	19	76.6	177	85.6	No	Yes	24.4502	18.5-24.99 kg/m.sq	118	79	76.6	97	0.789691	No	4.8	4.9	3.6	0.83	2.55899	0.46	No	No	No	No	4.33735	Moderate PAL	male	Drinks Alcohol 3 or more times/week	No	No	Yes	0.432768	4.4	12.9	No	76.507	4.33738	No	No	No	0.4	Secondary	Skilled	0-9	No	No	No	1.58924	No
680	19	94.8	175	63.7	No	Yes	30.9551	>=30 kg/m.sq	122	63	93.2333	107.5	0.867287	No	4.6	7.9	4.6	0.87	3.27128	1	No	Yes	No	No	5.28736	Low PAL	male	Drinks Alcohol 1-2 times/week	Yes	Yes		0.532762	6.4	7.1	No	101.648	4.62152	No	Yes	No	0.75	Primary/All Age	Skilled	10-14	No	No	No	2.06686	No
681	19	65.5	175.5	51.2	No	No	21.2661	18.5-24.99 kg/m.sq	116	55	68.5	92.3333	0.741877	No	4.7	2	5.3	1.17	3.80431	0.71	No	No	Yes	No	4.52991	Moderate PAL	male	Rarely Drinks Alcohol	No	No	No	0.390313	4	15.5	No	126.826	4.84282	No	No	No	0.3	Tertiary	Skilled	10-14	No	No	No	0.693147	No
682	18	64.8	179.9	74.5	No	Yes	20.0222	18.5-24.99 kg/m.sq	119	79	71.5	87.8	0.814351	No	5.1	10.4	3	0.84	2.02697	0.29	No	No	No	Yes	3.57143	High PAL	male	Drinks Alcohol 1-2 times/week	No	No		0.397443	5.8	2.9	No	89.3463	4.49252	No	No	No	0.3	Secondary	Skilled	10-14	No	No	No	2.34181	Yes
683	19	60.2	171.5	41.9	No	No	20.4677	18.5-24.99 kg/m.sq	119	58	71.8333	88.4667	0.811982	No	6.8	7	4.5	1.47	2.76394	0.58	No	Yes	No	Yes	3.06122	Moderate PAL	male	Drinks Alcohol 3 or more times/week	No	No	No	0.418853	3.7	6.7	No	151.444	5.02022	No	Yes	No	2.25		Highly Skilled	0-9	No	No	No	1.94591	No
684	18	70	171.4	89.2	No	No	23.8274	18.5-24.99 kg/m.sq	110	27	76.5	90.3	0.847176	No	5.4	3	3.8	1.14	2.51321	0.32	No	Yes	No	Yes	3.33333	Moderate PAL	male	Drinks Alcohol 3 or more times/week	No	No	No	0.446324	5.1	4.1	No	71.0964	4.26404	No	Yes	No	0.95	Secondary	Semi/Unskilled	10-14	No	No	No	1.09861	No
685	20	72	180.6		No	No	22.0748	18.5-24.99 kg/m.sq	134	79	69.6667	94.3333	0.738516	No	4.9	3	5.4	1.22	3.97358	0.45	No	No	Yes	No	4.42623	Moderate PAL	male	Drinks Alcohol 3 or more times/week	No	Yes		0.385751	5	9	No				No	No	0.35	Secondary	Skilled	10-14	No	No	No	1.09861	No
686	19	68.4	172.7	85.6	No	No	22.9336	18.5-24.99 kg/m.sq	109	73	72.1333	96.0667	0.750867	No	4.2	2.7	3.9	1.36	2.21431	0.71	No	No	No	No	2.86765	Moderate PAL	male	Drinks Alcohol 3 or more times/week	No	No	No	0.41768	4.4	12.2	No	74.6484	4.31279	No	No	No	0.3	Secondary	Semi/Unskilled	15-17	No	No	No	0.993252	No
687	19	66.8	182.1	60.7	No	Yes	20.1445	18.5-24.99 kg/m.sq	121	80	72	92	0.782609	No	4.6	5.2	3.7	0.95	2.45642	0.64	No	No	No	No	3.89474	High PAL	male	Drinks Alcohol 3 or more times/week	No	Yes	Yes	0.395387	3.8	2.5	No	111	4.70953	No	Yes	Yes	0.85	Secondary	Semi/Unskilled	0-9	No	No	No	1.64866	No
688	19	69.5	173	82.4	No	No	23.2216	18.5-24.99 kg/m.sq	106	70	74.5	94.4	0.789195	No	4.5	2.7	3.4	1.09	2.13569	0.38	No	No	No	No	3.11927	High PAL	male	Rarely Drinks Alcohol	No	No	No	0.430636	4.3	6.2	No	77.682	4.35262	No	No	No	0.3	Tertiary	Highly Skilled	15-17	No	No	No	0.993252	No
689	19	61	185.3	73.1	No	No	17.7656	<18.5 kg/m.sq.	117	59	66.7	85.4	0.78103	No	4.7	4.9	4	1.19	2.48431	0.71	No	No	No	No	3.36134	Moderate PAL	male	Rarely Drinks Alcohol	No	No	No	0.359957	3.9	3.5	No	93.7907	4.54107	No	No	No	0.3	Primary/All Age	Skilled	10-14	No	No	No	1.58924	No
690	20	91.9	173.8	98	No	No	30.424	>=30 kg/m.sq	109	78	91.6333	111	0.825526	No	4.8	11	5	1.19	3.61275	0.43	No	No	No	No	4.20168	Moderate PAL	male	Drinks Alcohol 1-2 times/week	No	No	Yes	0.527234	6.4	2.5	No	65.6184	4.18386	No	No	No	2.65	Secondary	Skilled	10-14	No	No	No	2.3979	Yes
691	19	74.6	181.5	73.1	No	No	22.6457	18.5-24.99 kg/m.sq	136	89	75.8	97.2	0.779835	No	11.2	8.6	5.9	1.62	3.96349	0.69	No	No	Yes	Yes	3.64198	Moderate PAL	male	Rarely Drinks Alcohol	No	Yes	No	0.417631	5.2	33.6	Yes	91.8673	4.52035	Yes	No	No	3.35	Primary/All Age	Skilled	0-9	No	No	No	2.15176	No
692	19	114.7	181.6	82.5	Yes	No	34.7802	>=30 kg/m.sq	125	89	104.833	126.1	0.831351	Yes	5.1		6	1.32	4.27633	0.88	No	No	Yes	Yes	4.54545	Low PAL	male	Drinks Alcohol 3 or more times/week	Yes	Yes	Yes	0.577276	3.9	0.9	No	81.4449	4.39993	No	No	Yes	1		Highly Skilled	15-17	Yes	Yes	Yes		No
693	18	68.5	170.4	83.3	No		23.5913	18.5-24.99 kg/m.sq	123	78	76.4	92.2	0.828633								No	No	No			High PAL	male	Rarely Drinks Alcohol		Yes	No	0.448357	3.3	2.5	No	75.6879	4.32662	No	No	No	1.45	Secondary	Skilled	0-9	No	No	No		No
694	18	65	175.4	62.7	No	Yes	21.1278	18.5-24.99 kg/m.sq	103	70	72.4	90.2	0.802661	No	4.1	3.1	4.1	0.78	3.04018	0.61	No	No	No	No	5.25641	High PAL	male	Rarely Drinks Alcohol	No	No		0.412771	4.1	31.1	Yes	103.506	4.63963	Yes	No	No	1.1	Secondary	Skilled	15-17	No	No	No	1.1314	No
695	19	57.9	181.9	70	No	No	17.499	<18.5 kg/m.sq.	111	76	61.8333	92.2333	0.670401	No	4.2	3.9	4.5	1.22	3.12862	0.33	No	No	No	No	3.68852	Low PAL	male	Drinks Alcohol 3 or more times/week	No	No		0.33993	3.7	13.2	No	96.1471	4.56588	No	No	No	0.3	Secondary	Skilled	10-14	No	No	No	1.36098	No
696	19	62.3	167.4	73.1	No	No	22.2319	18.5-24.99 kg/m.sq	123	69	75.2333	93.9667	0.800638	No	4.7	2	4.7	1.13	3.05165	1.13	No	No	No	No	4.15929	High PAL	male	Drinks Alcohol 1-2 times/week	Yes	Yes	No	0.449423	5.1	6	No	84.7305	4.43948	No	No	No	0.3	Secondary	Skilled	10-14	No	No	No	0.693147	No
697	19	60.5	170.7	70	No	No	20.7629	18.5-24.99 kg/m.sq	108	67	68.2	90.4	0.754425	No	4.3	2.8	3	1.04	1.7811	0.39	No	No	No	No	2.88462	Low PAL	male	Drinks Alcohol 1-2 times/week	No	No		0.399531	6.5	28.9	No	90.2271	4.50233	No	Yes	No	0.3	Secondary	Skilled	10-14	No	No	No	1.02962	No
698	19	58	180.6	45.1	No	Yes	17.7825	<18.5 kg/m.sq.	101	61	67.9333	85.4	0.795472	No	4.7	2.9	4.1	0.99	2.54578	1.23	No	No	No	No	4.14141	Moderate PAL	male	Drinks Alcohol 1-2 times/week	Yes	No	Yes	0.376154	6.4	24	No	148.164	4.99832	No	No	No	0.3	Tertiary	Highly Skilled	15-17	No	No	No	1.06471	No
699	19	50.3	168	76.3	No	No	17.8217	<18.5 kg/m.sq.	113	57	61	82.1333	0.742695	No	5	3.2	4.1	1.56	2.36569	0.38	No	No	No	Yes	2.62821	Moderate PAL	male	Drinks Alcohol 1-2 times/week	No	No	No	0.363095	4.3	2.5	No	81.4679	4.40021	No	Yes	No	3.8	Secondary	Semi/Unskilled	10-14	No	No	No	1.16315	No
700	19	63	176.5	73.1	No	No	20.2233	18.5-24.99 kg/m.sq	111	66	69	87	0.793103	No	4.9	2	3.4	1.05	2.09312	0.56	No	Yes	No	No	3.2381	Moderate PAL	male	Drinks Alcohol 3 or more times/week	No	No		0.390935	6.1	28.5	No	89.3365	4.49241	No	Yes	Yes	1.35	Secondary	Highly Skilled	0-9	No	No	No	0.693147	No
701	19	67	179.2	107.4	No	No	20.8641	18.5-24.99 kg/m.sq	148	67	70.5	94.7	0.744456	No	4.9	2	4.1	1.44	2.4811	0.39	Yes	No	No	No	2.84722	Moderate PAL	male	Never Drank Alcohol	No	Yes	No	0.393415	5.2	16.3	No	61.7356	4.12286	No	No		0.55	Tertiary	Semi/Unskilled	10-14	No	No	No	0.693147	No
702	19	67.8	182.6	91.8	No		20.3342	18.5-24.99 kg/m.sq	107	66	75	94.2667	0.795615		4.9		4			0.34	No	No	No	No		High PAL	male	Never Drank Alcohol	No	No	No	0.410734				73.5969	4.2986		No		2.4	Secondary	Skilled	10-14	No	No	No		No
703	20	67.5	180	54.5	No	Yes	20.8333	18.5-24.99 kg/m.sq	127	88	72.7	96.9667	0.749742	No	4.5	2	3.6	0.95	2.26009	0.85	No	No	No	No	3.78947	Moderate PAL	male	Never Drank Alcohol	Yes	Yes	Yes	0.403889	4.5	2.5	No	122.202	4.80567	No	No		1.4	Tertiary	Highly Skilled	10-14	No	No	No	0.693147	No
704	18	76.3	177.9	77.4	No	No	24.1086	18.5-24.99 kg/m.sq	104	63	73.8333	96.2	0.767498	No	4.5		3.8	1.18	2.34477	0.6	No	No	No	No	3.22034	Low PAL	male	Rarely Drinks Alcohol	No	No	No	0.415027	4.2	2.1	No	85.0426	4.44315	No	No	No	0.5	Secondary	Skilled	10-14	No	No	No		No
705	19	76.3	176.6	85.6	No	Yes	24.4649	18.5-24.99 kg/m.sq	135	55	88.0667	96.9333	0.908528	No	5	6.3	4.1	0.82	3.12404	0.34	No	No	No	Yes	5	Low PAL	male	Rarely Drinks Alcohol	No	Yes	No	0.498679	6.9	4.7	No	76.3341	4.33512	No	No	No	0.3	Secondary	Highly Skilled	15-17	No	No	No	1.84055	No
706	19	84.3	173	73.1	No	Yes	28.1667	25-29.99 kg/m.sq	117	77	83.5	103.5	0.806763	No	4.4	7.5	3	0.82	1.87266	0.67	No	No	No	No	3.65854	Low PAL	male	Drinks Alcohol 1-2 times/week	No	No	Yes	0.482659	5.1	2.5	No	87.565	4.47238	No	No	No	0.4		Semi/Unskilled	0-9	No	No	No	2.0149	No
707	18	54.2	172.4	74.5	No	No	18.2358	<18.5 kg/m.sq.	94	54	64.7667	81.3333	0.796311	No	4.9	2	4.3	1.29	2.81734	0.42	No	No	No	No	3.33333	High PAL	male	Rarely Drinks Alcohol	No	No		0.375677	3.8	44.7	Yes	85.6215	4.44994	Yes	No	Yes	1	Tertiary	Highly Skilled	15-17	No	No	No	0.693147	No
708	19	66	180.5	70	No	No	20.2577	18.5-24.99 kg/m.sq	91	68	71.1333	93.3333	0.762143	No	4.4	2	3.5	1.02	2.29193	0.41	No	No	No	No	3.43137	Moderate PAL	male	Drinks Alcohol 3 or more times/week	No	No		0.39409	4.6	7	No	95.4071	4.55815	No	Yes	No	4.1	Secondary	Semi/Unskilled	0-9	No	No	No	0.693147	No
709	19	77.4	176.4	60.7	No	No	24.8739	18.5-24.99 kg/m.sq	115	72	74.2667	96.2667	0.771468	No	4.5	5.9	3.7	1.49	1.9944	0.47	No	No	No	No	2.48322	High PAL	male	Drinks Alcohol 3 or more times/week	No	No		0.421013	3.8	1.2	No	107.526	4.67773	No	Yes	Yes	0.3	Tertiary	Skilled	10-14	No	No	No	1.77495	No
710	18	76.2	177.6	98	No	No	24.1584	18.5-24.99 kg/m.sq	101	61	79.9333	90.9667	0.87871	No	4.6	2	4.2	1.27	2.72816	0.44	No	No	No	No	3.30709	High PAL	male	Drinks Alcohol 1-2 times/week	No	No		0.450075	5.8	0.8	No	67.0531	4.20548	No	No	Yes	0.3	Tertiary	Highly Skilled	15-17	No	No	No	0.693147	No
711	19	116.4	180.2	73.1	Yes	No	35.8462	>=30 kg/m.sq	130	83	110	119	0.92437	No	5	10.3	4.4	1.22	2.83138	0.76	No	No	No	Yes	3.60656	Moderate PAL	male	Drinks Alcohol 1-2 times/week	Yes	Yes	No	0.610433	8.2	2.5	No	91.2093	4.51316	No	No	Yes		Secondary		15-17	Yes	Yes	Yes	2.33214	Yes
712	18	67	175.9	74.5	No	No	21.6543	18.5-24.99 kg/m.sq	106	54	70.7333	97.3	0.726961	No	4.9	9.3	5.2	1.16	3.8611	0.39	No	No	No	No	4.48276	Low PAL	male	Drinks Alcohol 1-2 times/week	No	No	No	0.402122	4.6	4.1	No	87.3597	4.47003	No	No	No	0.3		Skilled	10-14	No	No	No	2.23001	No
713	18	61.4	179.9		No		18.9717	18.5-24.99 kg/m.sq	101	70	70.1	86.8	0.807604		4.3	2	3.5			0.47	No	No	No	No		High PAL	male	Drinks Alcohol 3 or more times/week	No	No	No	0.389661	3.4	6.8	No				Yes	Yes	2	Tertiary		10-14	No	No	No	0.693147	No
714	18	74.5	176.5	89.2	No	Yes	23.9148	18.5-24.99 kg/m.sq	111	65	76.8333	100.5	0.764511	No	4.6	14.5	3.8	0.69	2.91734	0.42	No	No	No	No	5.50725	High PAL	male	Drinks Alcohol 3 or more times/week	No	No	Yes	0.435316	5.4	1	No	73.2119	4.29336	No	No	Yes	3	Tertiary	Highly Skilled	15-17	No	No	No	2.67415	Yes
715	19	71.4	184.5	54.5	No	Yes	20.9752	18.5-24.99 kg/m.sq	102	59	72.4	95.4333	0.758645	No	4.5	2	4.7	0.95	3.55734	0.42	No	No	No	No	4.94737	Moderate PAL	male	Drinks Alcohol 1-2 times/week	No	No		0.392412	4.2	8.6	No	125.257	4.83037	No	Yes	No	0.4	Secondary	Semi/Unskilled	10-14	No	No	No	0.693147	No
716	19	61.1	179.9	88.7	No	No	18.879	18.5-24.99 kg/m.sq	110	74	68.8	87.0667	0.790199		4.8	5.4		1.32			No	Yes		No		Low PAL	male	Drinks Alcohol 3 or more times/week		No	No	0.382435	4.5	2.5	No	75.0428	4.31806	No	Yes	No	0.3	Tertiary	Skilled	0-9	No	No	No	1.6864	No
717	19	60.1	172.1	76.3	No	No	20.2914	18.5-24.99 kg/m.sq	107	57	69.2333	89.5333	0.773269	No	5.3	79.4	3.8	1.18	2.06037	1.22	No	No	No	Yes	3.22034	Moderate PAL	male	Drinks Alcohol 1-2 times/week	Yes	No		0.402285	5.3	12.8	No	83.4561	4.42432	No	No	Yes	0.6		Highly Skilled	10-14	No	No	No	4.3745	Yes
718	19	63.5	184.8	79.4	No	No	18.5939	18.5-24.99 kg/m.sq	92	63	72.5	89.5	0.810056	No	4.7	8	4.3	1.09	3.00817	0.44	No	No	No	No	3.94495	Low PAL	male	Drinks Alcohol 3 or more times/week	No	No	No	0.392316	4	2.5	No	86.1159	4.45569	No	No	Yes	0.3	Tertiary	Highly Skilled	10-14	No	No	No	2.07944	No
719	19	61.3	184	107.4	No	No	18.1061	<18.5 kg/m.sq.	113	82	64.5	88.0667	0.7324	No	4.9	4.6	3.9	1.13	2.52688	0.53	No	No	No	No	3.45133	High PAL	male	Drinks Alcohol 3 or more times/week	No	Yes	No	0.350543	4	9.2	No	63.3892	4.14929	No	No	No	2.3	Secondary	Semi/Unskilled	10-14	No	No	No	1.52606	No
720	19	70.2	174.5	66.8	No	No	23.054	18.5-24.99 kg/m.sq	127	78	77.4	92.4667	0.837058	No	4.6	8	5.5	1.34	3.97651	0.4	No	No	Yes	No	4.10448	Moderate PAL	male	Drinks Alcohol 1-2 times/week	No	Yes	Yes	0.443553	4.1	12.5	No	96.6542	4.57114	No	No	No	0.3	Secondary	Semi/Unskilled	15-17	No	No	No	2.07944	No
721	19	56.4	165.8	85.6	No	No	20.5168	18.5-24.99 kg/m.sq	115	68	71.7	89.6667	0.799628	No	3.9	2	3.9	1.23	2.4911	0.39	No	No	No	No	3.17073	Moderate PAL	male		No	No	Yes	0.432449	9.6	2.5	No	71.6659	4.27202	No	No	Yes		Secondary	Skilled	10-14	No	No	No	0.693147	No
722	19	64.7	179	94.9	No	No	20.1929	18.5-24.99 kg/m.sq	110	77	72.4667	97	0.747079	No	5	8.6	5	1.43	3.34064	0.5	No	No	No	Yes	3.4965	Moderate PAL	male	Drinks Alcohol 3 or more times/week	No	No	No	0.404842	4.1	53.6	Yes	69.7893	4.24548	Yes	No	Yes	0.35	Secondary	Highly Skilled	10-14	No	No	No	2.15176	No
723	18	72.7	177.1	92.1	No	No	23.1791	18.5-24.99 kg/m.sq	110	62	72.4333	93.0667	0.778295	No	4.3	4.1	3.9	1.2	2.4156	0.62	No	No	No	No	3.25	Moderate PAL	male	Drinks Alcohol 1-2 times/week	No	No	Yes	0.408997	3.8	5.1	No	71.1477	4.26476	No	No	No	1.3	Secondary	Highly Skilled	0-9	No	No	No	1.41099	No
724	19	57.9	171.5	85.6	No	No	19.6857	18.5-24.99 kg/m.sq	96	70	68.4	87.2	0.784404	No	4.8	9.3	4.1	1.7	2.20734	0.42	No	No	No	No	2.41176	Moderate PAL	male	Drinks Alcohol 3 or more times/week	No	No	No	0.398834	4.8	2.8	No	74.1297	4.30582	No	Yes	No	0.3	Secondary	Skilled	10-14	No	No	No	2.23001	No
725	19	57.6	166.2	82.5	No	No	20.8526	18.5-24.99 kg/m.sq	112	47	66	86.4	0.763889	No	4.1	2	3.6	1.01	2.43404	0.34	No	No	No	No	3.56436	Moderate PAL	male	Rarely Drinks Alcohol	No	No	Yes	0.397112	6.7	12.5	No	74.5382	4.31131	No	No	No	0.35		Skilled	10-14	No	No	No	0.693147	No
726	19	70.7	172.6	91.8	No	No	23.7322	18.5-24.99 kg/m.sq	115	70	71.3667	94.3333	0.756537	No	4.8	8.1	3.7	1.07	2.38229	0.54	No	No	No	No	3.45794	High PAL	male	Drinks Alcohol 3 or more times/week	No	No	No	0.41348	9			69.5665	4.24228		Yes	Yes	0.65	Secondary	Skilled	10-14	No	No	No	2.09186	No
727	19	79.9	173.1	73.1	No	No	26.6657	25-29.99 kg/m.sq	108	72	84.1	100	0.841	No	4.8	15.7	4.2	1.11	2.68174	0.89	No	No	No	No	3.78378	Moderate PAL	male	Rarely Drinks Alcohol	Yes	No		0.485846	5.4			87.6156	4.47296		No	No	0.3	Tertiary	Skilled	15-17	No	No	No	2.75366	Yes
728	19	135	175	88.7	Yes	Yes	44.0816	>=30 kg/m.sq	140	71	128	127.367	1.00497	No	4.5	20.6	5	0.6	3.84495	1.21	Yes	No	No	No	8.33333	Low PAL	male	Drinks Alcohol 1-2 times/week	Yes	Yes	Yes	0.731429	4.2	2.5	No	72.9989	4.29044	No	No	No	9.9	Tertiary	Highly Skilled	15-17	No	Yes	No	3.02529	Yes
729	19	69.4	183.5	63.8	No	No	20.6104	18.5-24.99 kg/m.sq	98	51	71.8	93.5	0.767914	No	4.6	2.8	4.1	1.05	2.90321	0.32	No	No	No	No	3.90476	Moderate PAL	male	Drinks Alcohol 1-2 times/week	No	No	No	0.391281	4.7	2.8	No	106.418	4.66738	No	No	No	2.25	Secondary	Skilled	0-9	No	No	No	1.02962	No
730	19	63.2	180.3	79.4	No	Yes	19.4413	18.5-24.99 kg/m.sq	110	78	71.5333	87.9333	0.813495	No	5.1	6.9	4.3	0.99	2.78248	1.15	No	Yes	No	Yes	4.34343	Moderate PAL	male	Drinks Alcohol 3 or more times/week	Yes	No		0.396746	6.2	2.5	No	84.0189	4.43104	No	Yes	No	3.85	Primary/All Age		0-9	No	No	No	1.93152	No
731	19	63.5	171.9	54.4	No	No	21.4893	18.5-24.99 kg/m.sq	115	76	74.0333	93.5333	0.791518		4.4	2		1.02			No	No		No		Moderate PAL	male	Drinks Alcohol 3 or more times/week		No	Yes	0.430677	8.8	29.4	No	116.917	4.76147	No	Yes	Yes	0.3	Tertiary	Highly Skilled	15-17	No	No	No	0.693147	No
732	18	67.8	169.2	86.2	No	No	23.6826	18.5-24.99 kg/m.sq	98	59	73.9	94.9	0.778714	No	4.6	10.8	3.9	1.15	2.46101	0.63	No	No	No	No	3.3913	High PAL	male	Drinks Alcohol 3 or more times/week	No	No	Yes	0.436761	6	1	No	72.6264	4.28533	No	Yes	No	7.2	Secondary	Skilled	10-14	No	No	No	2.37955	Yes
733	19	66.7	180.8	68.6	No	No	20.4046	18.5-24.99 kg/m.sq	109	70	68.6333	91.0333	0.753936	No	4.4		4.3	1.47	2.60523	0.49	No	No	No	No	2.92517	Moderate PAL	male	Rarely Drinks Alcohol	No	No	No	0.379609	4.6	157.6	Yes	97.516	4.58002	Yes	No	No		Secondary	Skilled	0-9	No	No	No		No
734	19	67.5	180.5	88.7	No	No	20.7181	18.5-24.99 kg/m.sq	102	59	69.4	91.0333	0.762358	No	5	3.6	5.4	1.86	3.29229	0.54	No	No	Yes	Yes	2.90323	Moderate PAL	male	Drinks Alcohol 1-2 times/week	No	No	Yes	0.384488	6.3	4.1	No	75.2931	4.32139	No	No	No	0.3		Semi/Unskilled	10-14	No	No	No	1.28093	No
735	19	67.7	171.8	60.6	No	No	22.9373	18.5-24.99 kg/m.sq	121	80	75	95.1333	0.788367	No	5.2	12.6	3.8	1.02	2.53229	0.54	No	No	No	Yes	3.72549	Moderate PAL	male	Rarely Drinks Alcohol	No	Yes	Yes	0.436554	5	24.2	No	104.894	4.65295	No	No	No	1.5	Tertiary	Highly Skilled	15-17	No	No	No	2.5337	Yes
736	19	78.5	190	94.9	No	Yes	21.7452	18.5-24.99 kg/m.sq	114	76	76.8	96.0333	0.799722	No	5.4		4.6	0.81	3.40927	0.83	No	No	No	Yes	5.67901	High PAL	male	Drinks Alcohol 1-2 times/week	Yes	No	Yes	0.404211	5.7	10.6	No	74.078	4.30512	No	No	No	0.3		Skilled	10-14	No	No	No		No
737	19	69.2	172.8		No	Yes	23.1749	18.5-24.99 kg/m.sq	100	63	82.9333	96.0667	0.863289	No	5.2	8	4.4	0.96	3.11431	0.71	No	No	No	Yes	4.58333	Low PAL	male	Rarely Drinks Alcohol	No	No	No	0.479938	4.5	4.7	No				No	No	0.3	Secondary		10-14	No	No	No	2.07944	No
738	19	54.5	170.3		No		18.7917	18.5-24.99 kg/m.sq	128	62	68.5667	84.5	0.81144		5.2	2.9	3.8			0.88	No	No	No	Yes		Moderate PAL	male	Drinks Alcohol 1-2 times/week	Yes	Yes	Yes	0.402623	3.5	6.3	No				No	No	0.3		Semi/Unskilled	0-9	No	No	No	1.06471	No
739	19	56.7	175.6	60.6	No	Yes	18.388	<18.5 kg/m.sq.	101	66	66	85.7333	0.769829	No	4.7	2.4	3.8	1	2.64404	0.34	No	No	No	No	3.8	Low PAL	male	Drinks Alcohol 3 or more times/week	No	No	No	0.375854	4.6	1.4	No	107.215	4.67483	No	Yes	Yes	0.95		Skilled	0-9	No	No	No	0.875469	No
740	19	68.9	178	101.2	No	No	21.746	18.5-24.99 kg/m.sq	94	61	72.8	91.5	0.795628	No	4.6	8.4	3.7	1.08	2.37688	0.53	No	Yes	No	No	3.42593	High PAL	male	Drinks Alcohol 3 or more times/week	No	No	Yes	0.408989	5.5	2.5	No	65.0791	4.1756	No	Yes	Yes	0.4	Tertiary	Highly Skilled	15-17	No	No	No	2.12823	No
741	19	58.2	178.4	85.6	No	No	18.2866	<18.5 kg/m.sq.	106	75	65.3	85.7333	0.761664	No	4.4	3.1	4.4	1.4	2.77523	0.49	No	No	No	No	3.14286	High PAL	male	Drinks Alcohol 1-2 times/week	No	No	No	0.366031	8.3	8	No	77.1121	4.34526	No	No	No	0.3	Secondary	Skilled	10-14	No	No	No	1.1314	No
742	19	65.9	179.4	82.5	No	No	20.4758	18.5-24.99 kg/m.sq	121	86	67.7667	91.9333	0.737128	No	5.2	8.2	4	1.25	2.44725	0.66	No	No	No	Yes	3.2	Moderate PAL	male	Drinks Alcohol 3 or more times/week	No	Yes	Yes	0.377741	3.8	3.9	No	80.4582	4.38774	No	No	No	0.3		Skilled	10-14	No	No	No	2.10413	No
743	18	84.7	174.7	68.6	No	No	27.7522	25-29.99 kg/m.sq	119	70	80.9	103.2	0.783915	No	4.5	3.9	3.8	1.13	2.24339	0.93	No	No	No	No	3.36283	Moderate PAL	male	Never Drank Alcohol	Yes	No		0.46308	4.7	3.3	No	94.2259	4.5457	No	No		0.3	Primary/All Age	Semi/Unskilled	0-9	No	No	No	1.36098	No
744	19	80.7	179.5	101.1	No	No	25.0464	25-29.99 kg/m.sq	114	69	81	100.7	0.804369	No	5.4	4.1	5	1.49	3.26229	0.54	No	No	No	Yes	3.3557	Moderate PAL	male	Rarely Drinks Alcohol	No	No	Yes	0.451253	5.9	2.5	No	65.6924	4.18498	No	No	No	0.5	Secondary	Highly Skilled	0-9	No	No	No	1.41099	No
745	20	59.4	167.5	85.6	No	No	21.1718	18.5-24.99 kg/m.sq	113	75	68.9333	90.3333	0.7631	No	5	3.7	5.9	1.62	4.04606	0.51	No	No	Yes	Yes	3.64198	Moderate PAL	male	Drinks Alcohol 3 or more times/week	No	No		0.411542	3.9	2.6	No	72.4007	4.28222	No	No	No	1.75	Tertiary	Semi/Unskilled	0-9	No	No	No	1.30833	No
746	19	60.7	166.2	70	No	Yes	21.9749	18.5-24.99 kg/m.sq	111	62	69.9667	87.6	0.798706	No	5.4	2.8	4.7	1	3.18624	1.12	No	Yes	No	Yes	4.7	Moderate PAL	male	Drinks Alcohol 3 or more times/week	Yes	No	No	0.420979	3.4	6.8	No	87.8486	4.47561	No	Yes	No			Highly Skilled	0-9	No	No	No	1.02962	No
747	19	67.7	174.6	98	No	No	22.2075	18.5-24.99 kg/m.sq	112	72	71.1	97.2	0.731481	No	5	5.1	5.7	1.56	4.00697	0.29	No	No	Yes	Yes	3.65385	Moderate PAL	male	Rarely Drinks Alcohol	No	No	No	0.407216	3.8	4.3	No	65.9204	4.18845	No	No	No	4.6	Secondary	Skilled	10-14	No	No	No	1.62924	No
748	18	71.2	168.6	83.3	No	No	25.0475	25-29.99 kg/m.sq	110	59	75	99.8	0.751503	No	4.9	4	4.6	1.1	3.24312	0.56	No	No	No	No	4.18182	Moderate PAL	male	Drinks Alcohol 3 or more times/week	No	No	Yes	0.44484	4.5	2.3	No	74.8884	4.316	No	No	No	0.5	Tertiary	Skilled	15-17	No	No	No	1.38629	No
749	18	62.3	167.8	77.4	No	No	22.1261	18.5-24.99 kg/m.sq	105	62	71.2333	86.9	0.819716	No	3.9	4.3	4.3	1.36	2.74275	0.43	No	No	No	No	3.16176	High PAL	male	Drinks Alcohol 1-2 times/week	No	No	No	0.424513	10.4	1	No	80.2145	4.3847	No	No	No	0.5	Secondary		10-14	No	No	No	1.45862	No
750	18	63.2	181.1	62.7	No	Yes	19.2699	18.5-24.99 kg/m.sq	108	71	68.2333	88.2667	0.773036	No	4.6	4.3	3.6	0.72	2.50844	0.81	No	No	No	No	5	Moderate PAL	male	Drinks Alcohol 3 or more times/week	Yes	No	No	0.376772	4.7	3.8	No	106.869	4.67161	No	No	No		Secondary	Semi/Unskilled	10-14	No	No	No	1.45862	No
751	19	59.2	178.5	73.1	No	No	18.58	18.5-24.99 kg/m.sq	118	81	66.3	84.1	0.788347	No	4.8	10.9	4	1.1	2.66605	0.51	No	No	No	No	3.63636	High PAL	male	Drinks Alcohol 3 or more times/week	No	Yes	No	0.371429	3.7	4.1	No	90.3488	4.50368	No	No	No	0.65	Secondary	Semi/Unskilled	10-14	No	No	No	2.38876	Yes
752	19	132.6	186.7	70	Yes	Yes	38.0413	>=30 kg/m.sq	126	72	117.4	124	0.946774	No	4.7	6.1	2.7	0.91	1.39092	0.87	No	No	No	No	2.96703	High PAL	male	Drinks Alcohol 3 or more times/week	Yes	Yes	Yes	0.628816	7.8	5.5	No	98.6843	4.59193	No	Yes	Yes	0.55	Tertiary	Highly Skilled	10-14	No	Yes	No	1.80829	No
753	19	74.3	169.8	54.5	No	No	25.7699	25-29.99 kg/m.sq	125	63	81.1667	98.8667	0.820971	No	4.6	10.6	5.5	1.11	4.04596	0.75	No	No	Yes	No	4.95496	Moderate PAL	male	Drinks Alcohol 3 or more times/week	Yes	Yes	Yes	0.478013	5.8	2.5	No	115.277	4.74734	No	No	Yes	1.7	Secondary	Skilled	15-17	No	No	No	2.36085	Yes
754	19	63.9	174.5	63.8	No	No	20.9851	18.5-24.99 kg/m.sq	122	41	70.9333	94.6667	0.749296	No	4.3	5.4	3.8	1.28	2.30899	0.46	No	No	No	No	2.96875	Low PAL	male	Rarely Drinks Alcohol	No	Yes		0.406495	6.4	2.5	No	101.199	4.61709	No	No	No	0.3		Semi/Unskilled	0-9	No	No	No	1.6864	No
755	19	71.5	184.4	94.9	No	No	21.0273	18.5-24.99 kg/m.sq	110	65	71.4333	98.4333	0.725703	No	5	3.9	4.6	1.34	3.08569	0.38	No	No	No	Yes	3.43284	Moderate PAL	male	Drinks Alcohol 1-2 times/week	No	No		0.387383	4	2.5	No	71.8946	4.2752	No	No	No	0.3	Tertiary	Skilled	10-14	No	No	No	1.36098	No
756	19	61.9	172.5	91.8	No	No	20.8024	18.5-24.99 kg/m.sq	100	66	69.0333	91	0.758608	No	4.5	3.6	3.9	1.46	2.17853	0.57	No	No	No	No	2.67123	High PAL	male	Rarely Drinks Alcohol	No	No	No	0.400193	4.7	2.5	No	69.5261	4.2417	No	No		0.9	Secondary	Semi/Unskilled	10-14	No	No	No	1.28093	No
757	18	92.5	181.1	68.6	No	No	28.2036	25-29.99 kg/m.sq	107	72	68.4667	109.4	0.625838	No	4.8	9.2	5.4	1.15	3.84633	0.88	No	No	Yes	No	4.69565	Moderate PAL	male	Drinks Alcohol 3 or more times/week	Yes	No	Yes	0.37806	4.4	3	No	97.6778	4.58167	No	No	No	1.7	Secondary	Skilled	10-14	No	No	No	2.2192	No
758	19	71	183	85.6	No	No	21.201	18.5-24.99 kg/m.sq	99	50	73.4667	94.4333	0.777974	No	3.9	2.8	4.8	1.18	3.33101	0.63	No	No	No	No	4.0678	Low PAL	male	Never Drank Alcohol	No	No	No	0.401457	3.7	3	No	79.1005	4.37072	No	No		0.5	Tertiary	Skilled	10-14	No	No	No	1.02962	No
759	19	77.9	183.3	91.8	No	No	23.1853	18.5-24.99 kg/m.sq	117	77	80.6	99.3	0.811682	No	5.2	2	3.9	1.14	2.45266	0.67	No	Yes	No	Yes	3.42105	Moderate PAL	male	Drinks Alcohol 3 or more times/week	No	No	No	0.439716	4.8	7.7	No	73.8791	4.30243	No	No	No	7.6	Primary/All Age	Skilled	10-14	No	No	No	0.693147	No
760	18	77.9	182.8	77.4	No	No	23.3123	18.5-24.99 kg/m.sq	115	72	73.7	92.0333	0.800797	No	4.9		2.9	1.04	1.6444	0.47	No	No	No	No	2.78846	High PAL	male	Drinks Alcohol 3 or more times/week	No	No		0.403173	3.6	1.1	No	87.385	4.47032	No	No	Yes	0.3	Secondary		0-9	No	No	No		No
761	18	65.4	180	74.5	No	No	20.1852	18.5-24.99 kg/m.sq	97	60	70.9667	88.5333	0.801581	No	4	2.8	4.5	1.27	2.96853	0.57	No	No	No	No	3.54331	High PAL	male	Drinks Alcohol 1-2 times/week	No	No	Yes	0.394259	6.1	7.1	No	89.396	4.49308	No	Yes	Yes	1.15	Secondary	Skilled	10-14	No	No	No	1.02962	No
762	18	65.2	176.4	95	No	No	20.9532	18.5-24.99 kg/m.sq	111	72	66.8	88.2	0.75737	No	4.8	4.2	4.4	1.25	2.87936	0.59	No	No	No	No	3.52	Moderate PAL	male	Rarely Drinks Alcohol	No	No		0.378685	3.4	1.3	No	68.7032	4.22979	No	No	No	0.6		Skilled	10-14	No	No	No	1.43508	No
763	18	78.9	179	86.2	No	Yes	24.6247	18.5-24.99 kg/m.sq	104	74	76.2333	104.5	0.729506	No	4.5	10.1	3.1	0.83	2.03606	0.51	No	No	No	No	3.73494	High PAL	male	Rarely Drinks Alcohol	No	No	No	0.425885	4.8	38.7	Yes	76.8329	4.34163	Yes	No	No	1.35	Secondary	Highly Skilled	10-14	No	No	No	2.31254	Yes
764	19	69.1	184.1	77.4	No	No	20.3878	18.5-24.99 kg/m.sq	136	76	67.9667	92.3333	0.736101	No	4.5		5	1.29	3.43018	0.61	No	No	No	No	3.87597	Moderate PAL	male	Drinks Alcohol 1-2 times/week	No	Yes	No	0.369183	7.7	12.2	No	88.0065	4.47741	No	Yes	No	0.3	Secondary	Skilled	10-14	No	No	No		No
765	18	73.1	171.6	62.7	No	Yes	24.8246	18.5-24.99 kg/m.sq	108	72	78.5	98.1667	0.79966	No	5.4		4.5	0.95	3.25183	0.65	No	No	No	Yes	4.73684	Moderate PAL	male	Rarely Drinks Alcohol	No	No	Yes	0.457459	6.5			101.263	4.61772		No	No		Secondary	Skilled	10-14	No	No	No		No
766	19	65.6	182	83.3	No	No	19.8044	18.5-24.99 kg/m.sq	110	66	73.7667	91.4333	0.806781	No	4.5		4.4	1.02	3.1644	0.47	No	No	No	No	4.31373	High PAL	male	Rarely Drinks Alcohol	No	No	Yes	0.405311	6.8	143	Yes	80.8403	4.39248	Yes	No	No	0.75	Primary/All Age	Skilled	0-9	No	No	No		No
767	18	63	180.6	65.6	No	No	19.3155	18.5-24.99 kg/m.sq	113	54	70.4333	86.6	0.813318	No	4.3	5.5	3.5	1.15	2.1711	0.39	No	No	No	No	3.04348	High PAL	male	Never Drank Alcohol	No	No	No	0.389996	4.1	3.5	No	101.863	4.62363	No	No			Secondary	Skilled	10-14	No	No	No	1.70475	No
768	19	65.6	181.6	88.7	No		19.8917	18.5-24.99 kg/m.sq	114	71	72	89.5	0.804469								No	No	No			Low PAL	male	Drinks Alcohol 1-2 times/week		No	Yes	0.396476	3.8	6.9	No	75.752	4.32746	No	Yes	Yes	0.3	Primary/All Age	Skilled	0-9	No	No	No		No
769	19	67.2	171.4	129.2	No	Yes	22.8743	18.5-24.99 kg/m.sq	114	74	71.2667	93.9	0.758963	No	5	2.5	3.4	0.89	2.31734	0.42	No	No	No	Yes	3.82023	Moderate PAL	male	Rarely Drinks Alcohol	No	No	Yes	0.415792	9.3	2.5	No	49.0851	3.89356	Yes	No	No	0.35	Secondary	Skilled	0-9	No	No	No	0.916291	No
770	19	68.7	173.5	66.9	No	Yes	22.8222	18.5-24.99 kg/m.sq	99	59	74.5	95.4667	0.780377	No	5	7.2	4.8	1	3.55229	0.54	No	No	No	Yes	4.8	Moderate PAL	male	Drinks Alcohol 1-2 times/week	No	No	No	0.429395	4.1	13.3	No	95.9566	4.5639	No	Yes	Yes	0.55	Secondary	Skilled	10-14	No	No	No	1.97408	No
771	18	62.2	170.5	98	No	No	21.3964	18.5-24.99 kg/m.sq	107	63	67.9667	89	0.76367	No	4.5	4.6	3.9	1.06	2.61982	0.48	No	No	No	No	3.67925	Moderate PAL	male	Drinks Alcohol 1-2 times/week	No	No	Yes	0.398631	3.2	3.5	No	64.3725	4.16469	No	No	No	0.3		Semi/Unskilled	0-9	No	No	No	1.52606	No
772	19	61	173	85.6	No	No	20.3816	18.5-24.99 kg/m.sq	105	72	69.3	89.3333	0.775746	No	3.9	2.5	2.6	1.18	1.31908	0.22	No	No	No	No	2.20339	High PAL	male	Drinks Alcohol 3 or more times/week	No	No		0.400578	3.3	4.1	No	74.778	4.31452	No	Yes	No	0.3	Primary/All Age	Semi/Unskilled	0-9	No	No	No	0.916291	No
773	20	59.4	174.4	70	No	No	19.5296	18.5-24.99 kg/m.sq	100	62	68.2	85.5667	0.797039	No	4.2	2	3.3	1.5	1.56147	0.52	No	Yes	No	No	2.2	Low PAL	male	Drinks Alcohol 3 or more times/week	No	No	Yes	0.391055	6.9	4.4	No	92.1829	4.52377	No	Yes	Yes	0.4	Primary/All Age		10-14	No	No	No	0.693147	No
774	18	57.1	169.7	59.8	No	No	19.8277	18.5-24.99 kg/m.sq	104	57	65.2	85	0.767059	No	4.8	3.9	4.1	1.22	2.54972	0.72	No	No	No	No	3.36066	High PAL	male	Drinks Alcohol 3 or more times/week	No	No	No	0.384207	4.8	3.1	No	104.998	4.65394	No	Yes	No	0.3		Skilled	0-9	No	No	No	1.36098	No
775	19	75	179.3	85.6	No	No	23.3292	18.5-24.99 kg/m.sq	125	81	75.2	97.6	0.770492	No	5.1	49.9	4.5	1.02	3.11761	0.79	No	No	No	Yes	4.41176	High PAL	male	Drinks Alcohol 3 or more times/week	Yes	Yes	No	0.419409	5.3	4.7	No	77.5012	4.35029	No	Yes	Yes	1.15	Secondary	Skilled	0-9	No	No	No	3.91002	Yes
776	19	69.9	169.5	82.4	No	No	24.3298	18.5-24.99 kg/m.sq	129	85	81.1	92.3333	0.878339	No	4.7	8.8	4.6	1.23	3.22321	0.32	No	No	No	No	3.73984	Moderate PAL	male	Rarely Drinks Alcohol	No	Yes	Yes	0.478466	4.5	1.3	No	76.1104	4.33219	No	No	No	6.8	Tertiary	Skilled	10-14	No	No	No	2.17475	No
777	19	56.1	165.4	82.5	No	No	20.5065	18.5-24.99 kg/m.sq	131	65	66.1333	86.7333	0.76249	No	4.1	3.9	5	1.43	3.26266	0.67	No	Yes	No	No	3.4965	Moderate PAL	male	Drinks Alcohol 3 or more times/week	No	Yes		0.399839	7.3	5.1	No	74.1794	4.30649	No	Yes	No	0.3		Highly Skilled	10-14	No	No	No	1.36098	No
778	19	59.8	173.3	74.5	No	No	19.9115	18.5-24.99 kg/m.sq	105	49	67.7333	86.6	0.78214	No	4		3.4	1.31	1.92945	0.35	No	No	No	No	2.59542	Moderate PAL	male	Drinks Alcohol 3 or more times/week	No	No		0.390844	5.6			86.0685	4.45514		No	No	0.9	Secondary		0-9	No	No	No		No
779	19	64.7	185	98	No	No	18.9043	18.5-24.99 kg/m.sq	111	63	70.9333	85.6333	0.828338	No	4.4	2	3.7	1.13	2.32688	0.53	No	No	No	No	3.27434	High PAL	male	Rarely Drinks Alcohol	No	No	No	0.383423	6.6	1.7	No	69.8469	4.24631	No	No	No	0.3	Tertiary	Skilled	10-14	No	No	No	0.693147	No
780	19	119.7	182	85.6	Yes	Yes	36.1369	>=30 kg/m.sq	111	79	109.7	120.133	0.913152	No	3.9	8.7	4.3	0.92	3.04055	0.74	No	No	No	No	4.67391	Moderate PAL	male	Drinks Alcohol 1-2 times/week	No	No	No	0.602747	5.3	3.9	No	78.6682	4.36524	No	No	No	3.45	Secondary		10-14	No	No	No	2.16332	No
781	20	89.3	183	82.5	No	No	26.6655	25-29.99 kg/m.sq	128	73	83.9333	109.333	0.767683	No	4.2	9.2	3.4	1.08	2.08606	0.51	No		No	No	3.14815		male		No	Yes		0.458652	3.8	2.5	No	82.0727	4.40761	No			7.7				No	No	No	2.2192	No
782	19	69.3	184.2	98	No	No	20.4246	18.5-24.99 kg/m.sq	114	75	74.6333	94.5667	0.789214	No	4.4	3.9	4.9	1.02	3.5956	0.62	No	No	No	No	4.80392	High PAL	male	Drinks Alcohol 1-2 times/week	No	No	Yes	0.405176	6.7	4.8	No	69.5449	4.24197	No	Yes	Yes	0.3	Tertiary	Highly Skilled	10-14	No	No	No	1.36098	No
783	20	60.4	172.4	104.3	No	No	20.3218	18.5-24.99 kg/m.sq	107	61	69.2667	86.7667	0.79831	No	5.6	2	4.1	1.2	2.59266	0.67	No	No	No	Yes	3.41667	Moderate PAL	male	Drinks Alcohol 3 or more times/week	No	No	Yes	0.401779	6.4	2.5	No	61.1582	4.11346	No	No	Yes	0.3	Secondary	Semi/Unskilled	10-14	No	No	No	0.693147	No
784	18	79.2	180.3	95	No	Yes	24.3632	18.5-24.99 kg/m.sq	116	56	74.1667	98.4	0.753726	No	4.2	4	4.9	0.86	3.80147	0.52	No	No	No	No	5.69767	High PAL	male	Drinks Alcohol 1-2 times/week	No	No		0.411351	5.5	13.9	No	70.2221	4.25166	No	No	No	0.7	Secondary	Skilled	10-14	No	No	No	1.38629	No
785	19	70.8	175.3	76.2	No	No	23.0393	18.5-24.99 kg/m.sq	114	70	72.6	94.3	0.769883	No	4.6	8.5	2.7	1.1	1.48073	0.26	No	No	No	No	2.45455	High PAL	male	Rarely Drinks Alcohol	No	No	No	0.414147	4.6	3.4	No	85.1194	4.44406	No	No	No		Primary/All Age	Semi/Unskilled	0-9	No	No	No	2.14007	No
786	19	62.9	188.4	63.8	No	Yes	17.721	<18.5 kg/m.sq.	136	86	68	91.8	0.740741	No	5.4	11.4	3.1	0.93	1.8856	0.62	No	No	No	Yes	3.33333	High PAL	male	Drinks Alcohol 3 or more times/week	No	Yes	Yes	0.360934	10.9	47.6	Yes	109.26	4.69373	Yes	No	No	0.3	Secondary	Skilled	10-14	No	No	No	2.43361	Yes
787	18	64.9	171.7	74.5	No	Yes	22.0143	18.5-24.99 kg/m.sq	109	71	71.0667	84.9667	0.836406	No	4.5	4.4	4.5	0.95	3.18761	0.79	No	No	No	No	4.73684	High PAL	male	Drinks Alcohol 1-2 times/week	Yes	No	No	0.4139	4.2	2.6	No	85.2738	4.44587	No	No	No	1.05	Tertiary	Skilled	10-14	No	No	No	1.4816	No
788	18	55.3	171.4	83.3	No	Yes	18.8236	18.5-24.99 kg/m.sq	119	66	68.3	84.2	0.811164	No	4.9	8.9	3.8	0.96	2.61523	0.49	No	No	No	No	3.95833	Low PAL	male	Rarely Drinks Alcohol	No	No	No	0.398483	6.4	6.9	No	76.132	4.33247	No	No	No	0.4	Secondary	Semi/Unskilled	0-9	No	No	No	2.18605	No
789	20	70.9	174.5	70	No	No	23.2839	18.5-24.99 kg/m.sq	110	77	72.7333	94.4667	0.769936	No	4.2	5.7	4.3	1.34	2.70312	0.56	No	No	No	No	3.20896	Low PAL	male	Drinks Alcohol 3 or more times/week	No	No	Yes	0.41681	4.7	5.6	No	92.2357	4.52435	No	No	Yes	0.5	Tertiary	Highly Skilled	15-17	No	No	No	1.74047	No
790	19	71.8	185.7	71.5	No	No	20.821	18.5-24.99 kg/m.sq	102	76	74.5333	94.0667	0.792346	No	3.7		5.1	1.5	3.3844	0.47	No	No	No	No	3.4	High PAL	male	Drinks Alcohol 1-2 times/week	No	No	No	0.401364	2.9	1.5	No	96.0965	4.56535	No	No	No	1.25	Secondary	Semi/Unskilled	0-9	No	No	No		No
791	19	85	174	70	No	Yes	28.075	25-29.99 kg/m.sq	126	79	89	109.867	0.810073	No	5	7.5	4.8	0.97	3.49055	0.74	No	No	No	Yes	4.94845	Moderate PAL	male	Rarely Drinks Alcohol	No	Yes	No	0.511494	5.8	2.5	No	91.9714	4.52148	No	No	No	0.4	Tertiary	Semi/Unskilled	10-14	No	No	No	2.0149	No
792	19	76	182.5	79.3	No	No	22.8185	18.5-24.99 kg/m.sq	135	82	79.1333	95	0.832982	No	5.5	2	5.2	1.34	3.57101	0.63	No	No	No	Yes	3.8806	High PAL	male	Drinks Alcohol 1-2 times/week	No	Yes	No	0.433607	6	3.9	No	85.1513	4.44443	No	No	No	1	Secondary	Skilled	10-14	No	No	No	0.693147	No
793	19	65.6	177.9	94.9	No	No	20.7277	18.5-24.99 kg/m.sq	126	75	72.6	89	0.81573	No	4.4	2.7	4.1	1.15	2.63807	0.68	No	Yes	No	No	3.56522	High PAL	male	Drinks Alcohol 1-2 times/week	No	Yes	Yes	0.408094	4.9	4.7	No	69.3604	4.23932	No	Yes	No	2.55		Semi/Unskilled	0-9	No	No	No	0.993252	No
794	19	62.7	172.7	107.4	No	No	21.0224	18.5-24.99 kg/m.sq	114	73	70.5	91.9333	0.76686	No	4.9	2	4.7	1.25	3.14725	0.66	No	No	No	No	3.76	High PAL	male	Drinks Alcohol 3 or more times/week	No	No	Yes	0.408222	3.8	2.5	No	59.4963	4.08591	Yes	No	Yes	7.5	Tertiary	Highly Skilled	0-9	No	No	No	0.693147	No
795	19	61.7	182.6	88.7	No	No	18.5048	18.5-24.99 kg/m.sq	113	75	65.9	87.2	0.755734	No	5.2	3.3	4.4	1.16	2.74	1.09	No	No	No	Yes	3.7931	Low PAL	male	Drinks Alcohol 1-2 times/week	Yes	No		0.360898	5	5	No	76.1691	4.33296	No	No	No	0.3	Secondary	Skilled	10-14	No	No	No	1.19392	No
796	18	65.8	184.4	68.6	No	No	19.351	18.5-24.99 kg/m.sq	116	71	74.2667	88.7667	0.83665	No	3.7	18	4.5	1.23	2.95349	0.69	No	No	No	No	3.65854	Moderate PAL	male	Drinks Alcohol 1-2 times/week	No	No	No	0.402748	4.5	1.4	No	99.4577	4.59973	No	Yes	No	0.3	Secondary	Semi/Unskilled	15-17	No	No	No	2.89037	Yes
797	20	70.9	178.2	85.6	No	Yes	22.327	18.5-24.99 kg/m.sq	126	76	73	91.5	0.797814	No	5.1	3.5	3.5	0.62	2.43505	0.97	No	No	No	Yes	5.64516	High PAL	male	Rarely Drinks Alcohol	Yes	Yes	No	0.409652	6	235	Yes	77.0257	4.34414	Yes	No	No	0.3		Skilled	0-9	No	No	No	1.25276	No
798	19	73.8	184.7	107.4	No	Yes	21.6333	18.5-24.99 kg/m.sq	112	79	76.6	95.6	0.801255	No	4.6		4.2	0.79	2.93752	1.03	No	Yes	No	No	5.31646	High PAL	male	Drinks Alcohol 1-2 times/week	Yes	No	No	0.414727	4.3	26.4	No	63.6304	4.15309	No	No	No	2.95		Skilled	10-14	No	No	No		No
799	18	91.2	208	74.5	No	No	21.0799	18.5-24.99 kg/m.sq	108	60	76.8667	99.4	0.773306	No	5	5.1	3.3	1.02	2.08734	0.42	No	No	No	Yes	3.23529	High PAL	male	Rarely Drinks Alcohol	No	No	No	0.369551	4.5	1.2	No	103.302	4.63766	No	No	No	0.3	Secondary	Skilled	10-14	No	No	No	1.62924	No
800	19	67.2	175	66.9	No	No	21.9429	18.5-24.99 kg/m.sq	118	72	73.6	92	0.8	No	4	2	2.6	1.15	1.20229	0.54	No	No	No	No	2.26087	High PAL	male	Drinks Alcohol 3 or more times/week	No	No	No	0.420571	7.5	4.1	No	96.7862	4.5725	No	Yes	Yes	1.75	Secondary	Skilled	10-14	No	No	No	0.693147	No
801	19	76	170.4	63.7	No	No	26.1743	25-29.99 kg/m.sq	113	52	78.4	106.367	0.737073	No	4.6	6.1	3.9	1.35	2.28853	0.57	No	No	No	No	2.88889	Moderate PAL	male	Drinks Alcohol 1-2 times/week	No	No	No	0.460094	8.2	3.7	No	98.9764	4.59488	No	Yes	Yes	1.85	Secondary	Skilled	10-14	No	No	No	1.80829	No
802	18	65.6	174.1	80.3	No	No	21.6424	18.5-24.99 kg/m.sq	129	64	69.4	85.9333	0.807603	No	5	5.9	4.7	1.31	3.11477	0.6	No	No	No	Yes	3.58779	Moderate PAL	male	Drinks Alcohol 1-2 times/week	No	Yes	No	0.398621	3.9	3.6	No	80.2204	4.38478	No	No	No		Primary/All Age	Highly Skilled	0-9	No	No	No	1.77495	No
803	19	58.2	166.5	101.1	No	No	20.994	18.5-24.99 kg/m.sq	87	64	67.8	88.9	0.762655	No	4.2	2	5	1.73	3.0911	0.39	No	No	No	No	2.89017	High PAL	male	Rarely Drinks Alcohol	No	No	No	0.407207	3.8	2.5	No	60.9347	4.1098	No	No	No	0.4	Tertiary	Highly Skilled	10-14	No	No	No	0.693147	No
804	18	62.4	179.3	98	No	No	19.4099	18.5-24.99 kg/m.sq	90	64	69.0333	89.1667	0.774206	No	3.8	2.1	4.2	1.31	2.73862	0.33	No	No	No	No	3.20611	Moderate PAL	male	Rarely Drinks Alcohol	No	No	Yes	0.385016	6.3	7.1	No	67.6949	4.21501	No	No	No	0.3	Secondary	Highly Skilled	10-14	No	No	No	0.741937	No
805	18	66.8	175	74.5	No	No	21.8122	18.5-24.99 kg/m.sq	104	64	73.7	89.2	0.826233	No	4.4	3.8	3.4	1.29	1.7889	0.7	No	No	No	No	2.63566	High PAL	male	Drinks Alcohol 3 or more times/week	No	No	No	0.421143	7.2	5.6	No	86.9128	4.4649	No	Yes	Yes		Primary/All Age	Skilled	0-9	No	No	No	1.335	No
806	19	53.7	161.4	73.1	No	No	20.6142	18.5-24.99 kg/m.sq	106	57	68.5	87.3	0.784651	No	4.2	2.3	4.1	1.34	2.52605	0.51	No	No	No	No	3.0597	Low PAL	male	Rarely Drinks Alcohol	No	No		0.424411	5.1	22.9	No	81.6936	4.40298	No	No	No		Primary/All Age	Semi/Unskilled	10-14	No	No	No	0.832909	No
807	19	63	173.5	54.4	No	No	20.9287	18.5-24.99 kg/m.sq	98	63	75.4	90.3667	0.834378	No	5.5	10.7	4.7	1.16	3.04917	1.07	No	No	No	Yes	4.05172	Moderate PAL	male	Rarely Drinks Alcohol	Yes	No	Yes	0.434582	3	2.5	No	118.006	4.77073	No	No	Yes	0.7	Tertiary	Skilled	10-14	No	No	No	2.37024	Yes
808	19	75.7	178	98	No	Yes	23.8922	18.5-24.99 kg/m.sq	117	72	82.3333	94.3667	0.872483	No	5.4	10.8	2.7	0.91	1.45055	0.74	No	No	No	Yes	2.96703	High PAL	male	Drinks Alcohol 1-2 times/week	No	No		0.462547	6.9	6	No	67.2041	4.20773	No	No	No	4.35	Secondary	Skilled	10-14	No	No	No	2.37955	Yes
809	19	63.1	183.9	85.6	No	No	18.658	18.5-24.99 kg/m.sq	97	64	71.1333	89.3	0.796566	No	5.3	6.1	4	1.18	2.47596	0.75	No	No	No	Yes	3.38983	High PAL	male	Drinks Alcohol 1-2 times/week	Yes	No	No	0.386804	4.8	3.7	No	79.4895	4.37562	No	No	No	0.3	Primary/All Age	Semi/Unskilled	10-14	No	No	No	1.80829	No
810	19	84.5	184.2	109.7	No	No	24.9045	18.5-24.99 kg/m.sq	113	79	77.9667	98	0.795578	No	4.4		3.7	1.19	2.27147	0.52	No	No	No	No	3.10924	Moderate PAL	male	Drinks Alcohol 3 or more times/week	No	No	No	0.423272	6.1	3	No	62.1276	4.12919	No	Yes	Yes	0.85	Secondary	Highly Skilled	10-14	No	No	No		No
811	18	92.2	180.8	74.5	No	Yes	28.2055	25-29.99 kg/m.sq	130	66	93.6	101.133	0.925511	No	5	7.1	5.2	0.89	4.05312	0.56	No	No	No	Yes	5.8427	Moderate PAL	male	Drinks Alcohol 3 or more times/week	No	Yes	No	0.517699	6.7	1.2	No	89.7933	4.49751	No	No	Yes	0.3	Tertiary	Highly Skilled	15-17	No	No	No	1.96009	No
812	19	85.4	169.4	122.9	No	Yes	29.7599	25-29.99 kg/m.sq	103	70	67.4	84.5	0.797633	No	4.6	2	3.3	1	2.1578	0.31	No	Yes	No	No	3.3	Low PAL	male	Drinks Alcohol 1-2 times/week	No	No	No	0.397875	7	3.1	No	50.9992	3.93181	Yes	Yes	No	0.3	Secondary	Skilled	0-9	No	No	No	0.693147	No
813	19	83.4	180.5	76.3	No	No	25.5983	25-29.99 kg/m.sq	123	81	85.6	101.3	0.845015	Yes	4.8	10.8	5.9	1.18	4.27046	0.98	No	Yes	Yes	No	5	Moderate PAL	male	Drinks Alcohol 1-2 times/week	Yes	Yes	No	0.474238	4.5	4.3	No	87.5295	4.47198	No	Yes	No	0.3	Secondary		15-17	No	No	No	2.37955	Yes
814	19	74.9	181.1	91.8	No	No	22.8373	18.5-24.99 kg/m.sq	124	86	76.5	99.5	0.768844	No	5	3.3	3.8	1.07	2.56028	0.37	No	No	No	Yes	3.5514	High PAL	male	Drinks Alcohol 1-2 times/week	No	Yes	No	0.422419	6.1	4.2	No	72.9924	4.29036	No	No	No	1.45		Skilled	10-14	No	No	No	1.19392	No
815	20	73.1	175.7	101.1	No	Yes	23.6796	18.5-24.99 kg/m.sq	113	77	74.6667	94.4667	0.790402	No	4.4	2	3.3	0.8	2.36697	0.29	No	No	No	No	4.125	Moderate PAL	male	Drinks Alcohol 3 or more times/week	No	No	No	0.424967	5.6	2.5	No	64.3017	4.16359	No	Yes	No	0.3		Semi/Unskilled	10-14	No	No	No	0.693147	No
816	19	137.2	175	41.9	Yes	Yes	44.8	>=30 kg/m.sq	120	79	124.767	133.467	0.934815	Yes	5.1	17.6	5.8	0.97	4.42174	0.89	No	No	Yes	Yes	5.97938	Low PAL	male	Rarely Drinks Alcohol	Yes	Yes	Yes	0.712952	9	3.1	No	154.535	5.04042	No	No	Yes			Skilled	10-14	Yes	Yes	Yes	2.8679	Yes
817	20	62.8	180.4	88.7	No	No	19.2969	18.5-24.99 kg/m.sq	116	59	71.5	92.1333	0.776049	No	5.5	9.7	3.2	1.07	1.99239	0.3	No	No	No	Yes	2.99065	Low PAL	male	Drinks Alcohol 1-2 times/week	No	No		0.396341	5.8	2.5	No	75.2514	4.32083	No	No	No	4.45	Primary/All Age	Highly Skilled	15-17	No	No	No	2.27213	No
818	20	75.8	174.9	79.9	No	Yes	24.7793	18.5-24.99 kg/m.sq	114	70	78.6	98.9667	0.794207	No	5	2	2.6	0.75	1.53349	0.69	No	No	No	Yes	3.46667	Moderate PAL	male	Drinks Alcohol 3 or more times/week	No	No	Yes	0.4494		2.5	No	80.9925	4.39436	No	No	Yes	7.1		Semi/Unskilled	10-14	No	No	No	0.693147	No
819	18	74.1	168.6	74.5	No	No	26.0677	25-29.99 kg/m.sq	114	70	78.2	98.8667	0.790964	No	4.9	9.7	5	1.01	3.76064	0.5	No	Yes	No	No	4.9505	Moderate PAL	male	Drinks Alcohol 1-2 times/week	No	No	Yes	0.46382	3.9	3.2	No	83.7342	4.42765	No	Yes	No	0.3	Tertiary	Highly Skilled	0-9	No	No	No	2.27213	No
820	19	92.4	187.8	85.6	Yes	Yes	26.1988	25-29.99 kg/m.sq	111	70	95.0667	107.9	0.881063	No	4.5	5	4.8	1	3.50184	0.65	No	No	No	No	4.8	High PAL	male	Drinks Alcohol 1-2 times/week	No	No	No	0.506212	6.7	7.9	No	81.1752	4.39661	No	No	No	1	Secondary	Skilled	15-17	No	No	No	1.60944	No
821	19	56.4	168.1	91.8	Yes	No	19.9592	18.5-24.99 kg/m.sq	125	95	167	83.8667	1.99126	No	4.6	6.5	3.8	1.43	2.12229	0.54	Yes	Yes	No	No	2.65734	Moderate PAL	male	Drinks Alcohol 3 or more times/week	No	Yes	No	0.993456	6.4	13.5	No	67.7527	4.21586	No	Yes	No	0.3		Semi/Unskilled	0-9	No	No	No	1.8718	No
822	20	69.1	177.1	91.8	No	No	22.0313	18.5-24.99 kg/m.sq	96	66	76.5333	96.6	0.792271	No	4.4		4.2	1.09	2.86688	0.53	No	No	No	No	3.85321	Moderate PAL	male	Drinks Alcohol 3 or more times/week	No	No	Yes	0.432148				71.3802	4.26802		No	Yes	0.5	Tertiary	Highly Skilled	15-17	No	No	No		No
823	18	53.6	174.6	109	No	No	17.5823	<18.5 kg/m.sq.	118	81	65.4667	87	0.75249	No	4.3	5.1	4.4	1.1	2.93761	0.79	No	Yes	No	No	4	High PAL	male	Drinks Alcohol 3 or more times/week	Yes	Yes	No	0.374952	4.3	5.8	No	59.2679	4.08207	Yes	Yes	Yes	0.3	Secondary	Skilled	10-14	No	No	No	1.62924	No
824	18	71.3	176.6	74.5	No	No	22.8617	18.5-24.99 kg/m.sq	108	69	74.6	93.5	0.797861	No	4.8	6.3	3.9	1.1	2.64404	0.34	No	No	No	No	3.54545	Moderate PAL	male	Rarely Drinks Alcohol	No	No	Yes	0.422424	7	0.9	No	87.7074	4.47401	No	No	No	0.9	Secondary	Skilled	10-14	No	No	No	1.84055	No
825	19	72.5	179.5	91.8	No	No	22.5014	18.5-24.99 kg/m.sq	115	78	74.6667	96.3	0.775355	No	4.7	4.3	4.4	1.13	3.01771	0.55	No	No	No	No	3.89381	Moderate PAL	male	Drinks Alcohol 1-2 times/week	No	No	No	0.41597	5.6	2.5	No	72.3475	4.28148	No	No	No	0.4	Secondary	Highly Skilled	0-9	No	No	No	1.45862	No
826	20	72.5	172.6		No		24.3364	18.5-24.99 kg/m.sq	109	73	71.9333	97.5667	0.737274		4.5		3.5			0.48	No	Yes	No	No		Moderate PAL	male	Drinks Alcohol 3 or more times/week	No	No	Yes	0.416763	3.2	10	No				Yes	No	6.55	Secondary	Skilled	10-14	No	No	No		No
827	19	89.4	177.1	73.1	No	No	28.5036	25-29.99 kg/m.sq	119	82	84.4	106.2	0.794727	No	4.7	4.7	4.1	1.13	2.69018	0.61	No	No	No	No	3.62832	High PAL	male	Drinks Alcohol 1-2 times/week	No	Yes	No	0.476567	4	3.8	No	89.6402	4.4958	No	No	Yes	2.15	Secondary	Highly Skilled	10-14	No	No	No	1.54756	No
828	20	68.4	172.8	107.4	No	No	22.907	18.5-24.99 kg/m.sq	119	81	74	93.5	0.791444	No	4.1		3.8	1.72	1.84606	0.51	No	No	No	No	2.2093	High PAL	male	Drinks Alcohol 1-2 times/week	No	Yes	No	0.428241	4.1			59.5307	4.08649	Yes	No	No		Tertiary	Skilled	10-14	No	No	No		No
829	19	112.1	184.2	73.1	Yes	Yes	33.039	>=30 kg/m.sq	105	68	95.4333	114.7	0.832026	No	5		4.6	0.97	3.25385	0.82	No	No	No	Yes	4.74227	Moderate PAL	male	Rarely Drinks Alcohol	Yes	No	No	0.518096	5.9	90.1	Yes	93.2339	4.53511	Yes	No	Yes	2.05	Secondary	Skilled	10-14	Yes	Yes	Yes		No
830	19	47.1	165.7	79.3	No	No	17.1544	<18.5 kg/m.sq.	113	69	63.7	79	0.806329	No	4.4	2	2.7	1.14	1.22514	0.73	No	No	No	No	2.36842	Moderate PAL	male	Rarely Drinks Alcohol	No	No	No	0.38443	4.8	2.5	No	77.3127	4.34786	No	Yes	No	0.3	Secondary	Skilled	10-14	No	No	No	0.693147	No
831	19	64.5	174.9	76.3	No	No	21.0853	18.5-24.99 kg/m.sq	114	65	68.6	90.6333	0.756896	No	4.5	2.4	3.5	1.17	2.06853	0.57	No	No	No	No	2.99145	Moderate PAL	male	Drinks Alcohol 3 or more times/week	No	No	No	0.392224	4.2	2.5	No	84.8139	4.44046	No	Yes	No	6.4	Secondary	Skilled	10-14	No	No	No	0.875469	No
832	19	62	168		No	No	21.9671	18.5-24.99 kg/m.sq	97	59	72.2667	92.8333	0.778456	No	5.5	10	5.5	1.46	3.69596	0.75	No	No	Yes	Yes	3.76712	Moderate PAL	male	Never Drank Alcohol	Yes	No		0.430159	7.3	6.8	No				No		0.3	Tertiary	Highly Skilled	10-14	No	No	No	2.30259	Yes
833	19	74.6	180	88.7	No	No	23.0247	18.5-24.99 kg/m.sq	104	68	74.9	95.9667	0.780479	No	4.7	8.1	4.7	1.26	3.14642	0.64	No	No	No	No	3.73016	High PAL	male	Drinks Alcohol 3 or more times/week	No	No	Yes	0.416111	3.3	2.5	No	75.0846	4.31861	No	No	No	0.8	Tertiary	Highly Skilled	10-14	No	No	No	2.09186	No
834	19	84.5	174.8	94.9	No	Yes	27.655	25-29.99 kg/m.sq	123	60	91.8	105.4	0.870968	No	4.9	7.1	5.3	0.99	3.93844	0.81	No	No	Yes	No	5.35354	Low PAL	male	Drinks Alcohol 1-2 times/week	Yes	Yes	No	0.525172	4.4	2.5	No	68.1517	4.22174	No	No	Yes	0.3	Secondary	Skilled	10-14	No	No	No	1.96009	No
835	18	96.4	185.5	74.5	No	No	28.0149	25-29.99 kg/m.sq	122	59.5	89.0333	107.5	0.828217	No	4.9	10.6	3.5	1.47	1.88321	0.32	No	No	No	No	2.38095	High PAL	male	Drinks Alcohol 1-2 times/week	No	Yes	No	0.479964	6.1	2.1	No	92.1275	4.52317	No	Yes	No	2		Semi/Unskilled	0-9	No	No	No	2.36085	Yes
836	19	71.7	190.4	79.4	No	No	19.7781	18.5-24.99 kg/m.sq	109	70	68	93.0333	0.730921	No	4.9	2	3.2	1.34	1.67651	0.4	No	No	No	No	2.38806	Low PAL	male	Rarely Drinks Alcohol	No	No	No	0.357143	3.4	7.3	No	88.7254	4.48555	No	No	No	0.3	Secondary	Skilled	10-14	No	No	No	0.693147	No
837	18	66.3	184	74.5	No	No	19.5829	18.5-24.99 kg/m.sq	101	67	72.3	87	0.831035	No	4.4	3.7	3.7	1.1	2.43028	0.37	No	Yes	No	No	3.36364	Moderate PAL	male	Drinks Alcohol 1-2 times/week	No	No		0.392935	3.9	3.9	No	91.3826	4.51505	No	Yes	No	0.3	Secondary	Skilled	0-9	No	No	No	1.30833	No
838	20	78.8	186	88.7	No		22.7772	18.5-24.99 kg/m.sq	125	75	80	99.4333	0.804559		5.2	6.2	3			0.32	No	No	No	Yes		High PAL	male	Rarely Drinks Alcohol	No	Yes	No	0.430108	6.4	7.9	No	77.5874	4.3514	No	No	No	0.3	Tertiary	Highly Skilled	15-17	No	No	No	1.82455	No
839	18	94.4	184.7	95	No	Yes	27.6719	25-29.99 kg/m.sq	115	73	90.4667	104.433	0.866262	No	5	9.1	4.6	0.84	3.29211	1.02	No	No	No	Yes	5.47619	Moderate PAL	male	Rarely Drinks Alcohol	Yes	No	Yes	0.489803	5.1	2.7	No	71.9358	4.27577	No	No	No	0.65	Tertiary	Semi/Unskilled	15-17	No	No	No	2.20827	No
840	18	72.2	188.2	89.2	No	No	20.3844	18.5-24.99 kg/m.sq	92	54	76.6333	93.6	0.818732	No	4.3	3.2	4.1	1.05	2.78394	0.58	No	No	No	No	3.90476	High PAL	male	Never Drank Alcohol	No	No		0.407191	3.4	6.5	No	78.065	4.35754	No	No		0.3	Primary/All Age	Skilled	0-9	No	No	No	1.16315	No
841	18	90.7	184.5	62.7	No		26.6449	25-29.99 kg/m.sq	107	63	82.9	104	0.797115		5	9.3	4.1			0.52	No	No	No	Yes		Low PAL	male	Drinks Alcohol 3 or more times/week	No	No	No	0.449322	4.1	8.5	No	108.876	4.69021	No	Yes	No	1.5		Semi/Unskilled	10-14	No	No	No	2.23001	No
842	18	60.4	180	83.3	No	No	18.642	18.5-24.99 kg/m.sq	113	75	66	83.9333	0.786338	No	5.2	3.5	3.7	1.19	2.20266	0.67	No	No	No	Yes	3.10924	Low PAL	male	Drinks Alcohol 3 or more times/week	No	No		0.366667	5.2	6.2	No	79.952	4.38143	No	No	No	0.3	Secondary	Skilled	0-9	No	No	No	1.25276	No
843	20	60.6	176.9	82.5	No	No	19.365	18.5-24.99 kg/m.sq	130	72	68	87	0.781609	No	3.7	2	4.4	1.36	2.83358	0.45	No	No	No	No	3.23529	Moderate PAL	male	Drinks Alcohol 3 or more times/week	No	Yes	No	0.384398	5.9	3.1	No	79.337	4.3737	No	Yes		0.3	Secondary	Skilled	0-9	No	No	No	0.693147	No
844	18	68.8	182	77.4	No	No	20.7704	18.5-24.99 kg/m.sq	116	76	75.4667	92.3	0.817624	No	4.6	5.4	3.6	1.08	2.32734	0.42	No	No	No	No	3.33333	Low PAL	male	Rarely Drinks Alcohol	No	No		0.414652	3.4	7	No	87.0026	4.46594	No	No	Yes	0.3	Secondary	Semi/Unskilled	10-14	No	No	No	1.6864	No
845	19	65.5	172.1	76.3	No	No	22.1146	18.5-24.99 kg/m.sq	114	79	72.2667	89.5	0.807449	Yes	5.1	4.4	6	1.11	4.37624	1.12	No	No	Yes	Yes	5.40541	Moderate PAL	male	Rarely Drinks Alcohol	Yes	No	No	0.419911	3.3	3.9	No	83.4561	4.42432	No	No	No	1.2	Secondary	Semi/Unskilled	10-14	No	No	No	1.4816	No
846	18	92.8	176.7	53.9	No	No	29.7218	25-29.99 kg/m.sq	122	62	92.6	107.733	0.85953	No	4.5	5.3	3.7	1.07	2.35018	0.61	No	No	No	No	3.45794	Moderate PAL	male	Never Drank Alcohol	No	Yes		0.524052	4.3	4.2	No	121.297	4.79824	No	No		1.4	Secondary	Skilled	15-17	No	No	No	1.66771	No
847	18	71.6	171.9	65.6	No	No	24.2304	18.5-24.99 kg/m.sq	106	68	75.7	94.3	0.802757	No	5.2	5.8	4.9	1.34	3.12881	0.94	No	No	No	Yes	3.65672	Moderate PAL	male	Drinks Alcohol 3 or more times/week	Yes	No	Yes	0.440372	4.8	4.7	No	96.9558	4.57425	No	No	Yes	0.35	Secondary	Skilled	10-14	No	No	No	1.75786	No
848	18	74.5	189	45.1	No	Yes	20.8561	18.5-24.99 kg/m.sq	105	63	75.2667	92.5333	0.813401	No	5.2	8.7	3.7	0.77	2.58138	0.76	No	No	No	Yes	4.80519	Moderate PAL	male	Rarely Drinks Alcohol	Yes	No	No	0.398236	5	3.2	No	155.055	5.04378	No	No	No	0.3	Tertiary	Highly Skilled	10-14	No	No	No	2.16332	No
849	19	61	173.8	63.7	No	No	20.1944	18.5-24.99 kg/m.sq	118	78	70	86.5333	0.808937	No	4.9		4.3	1.19	2.97239	0.3	No	No	No	No	3.61345	Moderate PAL	male	Drinks Alcohol 3 or more times/week	No	No	No	0.402762	2.9	2	No	100.951	4.61464	No	No	No	0.3	Secondary	Semi/Unskilled	0-9	No	No	No		No
850	20	68.4	175.6		No		22.1823	18.5-24.99 kg/m.sq	113	76	72.4333	91.6667	0.790182		5	2	3.4			0.39	No	Yes	No	Yes		Low PAL	male	Drinks Alcohol 1-2 times/week	No	No	Yes	0.41249	4.1	7.9	No				Yes	Yes	0.3	Primary/All Age	Skilled	0-9	No	No	No	0.693147	No
851	19	61.6	179.5	91.8	No	No	19.1184	18.5-24.99 kg/m.sq	109	78	69	89	0.775281	No	4.2	5.8	4.6	1.04	3.19761	0.79	No	No	No	No	4.42308	High PAL	male	Rarely Drinks Alcohol	Yes	No	No	0.384401	3.7	2.5	No	72.3475	4.28148	No	No	No	3.05	Secondary	Skilled	10-14	No	No	No	1.75786	No
852	19	71	175.4	66.9	No	No	23.0781	18.5-24.99 kg/m.sq	115	89	74.6667	92.9	0.803732	No	4.1	6.4	4.6	1.09	3.34028	0.37	No	No	No	No	4.22018	Moderate PAL	male	Drinks Alcohol 3 or more times/week	No	Yes	Yes	0.425694	4	2.9	No	97.0075	4.57479	No	No	No	2.1	Tertiary	Highly Skilled	15-17	No	No	No	1.8563	No
853	18	57.6	183.9	71.5	No	No	17.0317	<18.5 kg/m.sq.	102	68	63.6	85.2667	0.745895	No	4.3	6.3	4.1	1.19	2.72193	0.41	No	No	No	No	3.44538	Low PAL	male	Drinks Alcohol 3 or more times/week	No	No		0.34584	4.5	23	No	95.165	4.55561	No	No	No	0.85	Primary/All Age	Skilled	10-14	No	No	No	1.84055	No
854	20	82.5	171.6	88.7	No	No	28.0169	25-29.99 kg/m.sq	128	86	91.0333	104.633	0.870022	No	4		4.9	1.76	2.89229	0.54	No	No	No	No	2.78409	Moderate PAL	male	Drinks Alcohol 3 or more times/week	No	Yes	Yes	0.530497	6	2.5	No	71.5806	4.27082	No	No	No	1	Secondary	Semi/Unskilled	0-9	No	No	No		No
855	19	60.4	176	82.4	No	Yes	19.499	18.5-24.99 kg/m.sq	103	70	66.5	90.5	0.734807	No	4.6	4.7	4.4	0.9	3.11009	0.85	No	No	No	No	4.88889	Moderate PAL	male	Rarely Drinks Alcohol	Yes	No	No	0.377841	4	2.5	No	79.0291	4.36982	No	No	No	0.3	Tertiary	Semi/Unskilled	10-14	No	No	No	1.54756	No
856	18	73.6	168.7	80.3	No	No	25.8611	25-29.99 kg/m.sq	106	57	79.7667	100.233	0.79581	No	5	4	3.3	1.23	1.89569	0.38	No	No	No	Yes	2.68293	Low PAL	male	Rarely Drinks Alcohol	No	No	No	0.472831	10.9	1.5	No	77.7322	4.35327	No	Yes	No	1.5		Highly Skilled	10-14	No	No	No	1.38629	No
857	19	51	169.1	76.3	No	No	17.8354	<18.5 kg/m.sq.	118	70	67.2667	80.1667	0.839085	No	4.6	4.6	3.6	1.22	2.02679	0.77	No	Yes	No	No	2.95082	High PAL	male	Drinks Alcohol 3 or more times/week	Yes	No		0.397792	5.7	2.5	No	82.0013	4.40674	No	Yes	Yes	0.3	Secondary	Highly Skilled	10-14	No	No	No	1.52606	No
858	20	56.5	166.5	76.3	No	No	20.3807	18.5-24.99 kg/m.sq	119	78	71.4	87.3	0.817869	No	4.3	6	3.7	1.02	2.40018	0.61	No	No	No	No	3.62745	Low PAL	male	Rarely Drinks Alcohol	No	No	Yes	0.428829	4.9	2.5	No	80.7405	4.39124	No	No	No	2.55	Secondary	Semi/Unskilled	15-17	No	No	No	1.79176	No
859	19	140	166.4	54.4	No	Yes	50.5617	>=30 kg/m.sq	124	89	39.8	147.1	0.270564	No	5.3	21.6	3.6	0.9	2.39725	0.66	No	No	No	Yes	4	High PAL	male	Rarely Drinks Alcohol	No	Yes	Yes	0.239183	7.1	22.9	No	113.176	4.72895	No	No	Yes	7.9	Primary/All Age	Skilled	10-14	No	No	No	3.07269	Yes
860	18	61.4	183.3	77.4	No	No	18.2744	<18.5 kg/m.sq.	117	60	67.1	88.4	0.75905	No	4.9	8.1	3.1	1.35	1.5711	0.39	No	Yes	No	No	2.2963	High PAL	male	Drinks Alcohol 3 or more times/week	No	No	No	0.366067	6	3	No	87.624	4.47306	No	Yes	No	0.3	Secondary	Skilled	10-14	No	No	No	2.09186	No
861	19	77.8	182.4	101.1	No	Yes	23.3846	18.5-24.99 kg/m.sq	118	79	73.9	92.8333	0.79605	No	4.3	2.4	4.4	0.97	3.09972	0.72	No	No	No	No	4.53608	Moderate PAL	male	Rarely Drinks Alcohol	No	No	No	0.405154	7.4	9.9	No	66.7537	4.20101	No	No	Yes	0.3		Highly Skilled	10-14	No	No	No	0.875469	No
862	19	77.7	169.5	119.8	No	No	27.0447	25-29.99 kg/m.sq	109	68	80.4667	98.5	0.81692	No	4.7	2.7	3	1.14	1.7178	0.31	No	No	No	No	2.63158	Moderate PAL	male	Drinks Alcohol 1-2 times/week	No	No		0.47473	4.5	2.6	No	52.3497	3.95795	Yes	No	Yes	1.05	Primary/All Age	Skilled	10-14	No	No	No	0.993252	No
863	19	108.4	181.7	70	Yes	No	32.8337	>=30 kg/m.sq	137	68	95.9333	118.433	0.81002	No	5.6	19	3.2	1.02	1.90936	0.59	No	No	No	Yes	3.13725	High PAL	male	Drinks Alcohol 1-2 times/week	No	Yes	Yes	0.527977	5.9	3.6	No	96.0414	4.56478	No	Yes	No	1.6	Secondary	Semi/Unskilled	10-14	Yes	No	No	2.94444	Yes
864	20	64.4	175.9	73.1	No	No	20.8139	18.5-24.99 kg/m.sq	120	78	70.1	92.0333	0.761681	No	4.4	2	4.4	1.05	3.07936	0.59	No	No	No	No	4.19048	High PAL	male	Drinks Alcohol 3 or more times/week	No	Yes	No	0.398522	4	8.9	No	89.0328	4.48901	No	No	Yes	0.65	Primary/All Age	Skilled	0-9	No	No	No	0.693147	No
865	18	75.9	177	103.9	No	No	24.2268	18.5-24.99 kg/m.sq	112	68	76.7	94.6	0.810782	No	4.4	5.7	4.4	1.43	2.77734	0.42	No	No	No	No	3.07692	High PAL	male	Drinks Alcohol 3 or more times/week	No	No	No	0.433333	6.1	2.3	No	63.0318	4.14364	No	No	Yes	1.05	Secondary	Semi/Unskilled	10-14	No	No	No	1.74047	No
866	18	71	176.5	65.6	No	Yes	22.7913	18.5-24.99 kg/m.sq	116	35	70	91	0.769231	No	4.3	3.9	3.2	1	2.03945	0.35	No	No	No	No	3.2	High PAL	male	Rarely Drinks Alcohol	No	No	No	0.396601	4.3	8.2	No	99.5503	4.60066	No	No	No		Tertiary	Semi/Unskilled	10-14	No	No	No	1.36098	No
867	19	85.8	171.2		No		29.2738	25-29.99 kg/m.sq	127	70	84.2	104.967	0.802159		4.6		5.6			0.29	No	No	Yes	No		Low PAL	male	Rarely Drinks Alcohol	No	Yes	Yes	0.491822	4.4	11	No				No	No		Tertiary	Highly Skilled	10-14	No	No	No		No
868	19	85.5	182.3	79.3	No	Yes	25.7272	25-29.99 kg/m.sq	117	71	85.9	99.9	0.85986	No	4	6.5	3.3	0.75	2.18303	0.8	No	No	No	No	4.4	Moderate PAL	male	Drinks Alcohol 3 or more times/week	Yes	No	Yes	0.471201	7.5	12.3	No	85.058	4.44333	No	No	Yes	3.65	Primary/All Age	Skilled	15-17	No	No	No	1.8718	No
869	19	83.6	173.1	91.8	No	No	27.9005	25-29.99 kg/m.sq	104	69	86.8	109.933	0.789569	Yes	4.4	8.8	6.5	1.32	4.84055	0.74	No	No	Yes	No	4.92424	High PAL	male	Drinks Alcohol 1-2 times/week	No	No		0.501444	3.4	13.6	No	69.768	4.24517	No	No	Yes	1.25	Secondary	Skilled	10-14	No	No	No	2.17475	No
870	20	68.1	183.7	70	No	No	20.1804	18.5-24.99 kg/m.sq	108	70	70.5	89.3333	0.789179	No	4.3	2	4.2	1.13	2.85899	0.46	No	Yes	No	No	3.71681	Low PAL	male	Rarely Drinks Alcohol	No	No	Yes	0.383778	4.4	2.5	No	97.0986	4.57573	No	Yes	Yes	0.3	Secondary		0-9	No	No	No	0.693147	No
871	19	64.7	176.4	73.1	No	No	20.7925	18.5-24.99 kg/m.sq	121	58	67.3667	90.5	0.744383	No	4.6	6.6	3.7	1.45	1.94266	0.67	No	No	No	No	2.55172	Moderate PAL	male	Drinks Alcohol 1-2 times/week	No	Yes	No	0.381897	4.6	20	No	89.2859	4.49184	No	Yes	No	0.3	Secondary	Semi/Unskilled	10-14	No	No	No	1.88707	No
872	19	73.4	179.7	98	No	No	22.73	18.5-24.99 kg/m.sq	127	67	72.9333	97.5333	0.747779	No	4.8	11.5	3.9	1.01	2.70651	0.4	No	No	No	No	3.86139	Moderate PAL	male	Drinks Alcohol 3 or more times/week	No	Yes	No	0.405862	3.8	2.5	No	67.8459	4.21724	No	No	No	0.55		Semi/Unskilled	10-14	No	No	No	2.44235	Yes
873	19	60	170.6	94.9	No	No	20.6155	18.5-24.99 kg/m.sq	109	66	69.8667	88	0.793939	No	4.1		4.6	1.34	3.01229	0.54	No	No	No	No	3.43284	Low PAL	male	Rarely Drinks Alcohol	No	No		0.409535	5.1	5.3	No	66.5142	4.19742	No	No	Yes	0.3	Tertiary	Highly Skilled	10-14	No	No	No		No
874	19	99	184.5	60.6	Yes	Yes	29.0832	25-29.99 kg/m.sq	121	60	94.5	110	0.859091	No	4.5	3.7	4.4	0.98	3.06679	0.77	No	No	No	No	4.4898	Low PAL	male	Drinks Alcohol 1-2 times/week	Yes	Yes	Yes	0.512195	6.1	2.7	No	112.649	4.72427	No	Yes	Yes	0.3	Tertiary	Highly Skilled	10-14	No	Yes	No	1.30833	No
875	19	52.2	172.5	63.8	No	No	17.5425	<18.5 kg/m.sq.	111	74	63.6333	84.3667	0.754247	No	4	2.3	5	1.25	3.49312	0.56	No	No	No	No	4	Moderate PAL	male	Never Drank Alcohol	No	No	No	0.368889	3.4	34.5	Yes	100.039	4.60556	Yes	No		0.3	Tertiary	Semi/Unskilled	10-14	No	No	No	0.832909	No
876	18	59.1	178	59.8	No	Yes	18.6529	18.5-24.99 kg/m.sq	113	79	68.9	86.8	0.793779	No	3.7	7.1	3.9	0.9	2.75688	0.53	No	Yes	No	No	4.33333	Moderate PAL	male	Rarely Drinks Alcohol	No	No	Yes	0.387079	3.9	1.2	No	110.134	4.7017	No	No	No	0.3	Secondary	Semi/Unskilled	0-9	No	No	No	1.96009	No
877	19	71	179.2	98	No	No	22.1097	18.5-24.99 kg/m.sq	101	79	70.5333	93.5333	0.754098	No	4.6	2	3	1.47	1.31899	0.46	No	Yes	No	No	2.04082	Moderate PAL	male	Drinks Alcohol 3 or more times/week	No	No	Yes	0.393601	2.7	2.5	No	67.6571	4.21445	No	Yes	Yes	1.1	Secondary	Skilled	0-9	No	No	No	0.693147	No
878	20	76.3	178.2	73.1	No	No	24.0275	18.5-24.99 kg/m.sq	116	61	75.0333	98.3667	0.762792	No	4.7	2	3.9	1.15	2.36009	0.85	No	No	No	No	3.3913	High PAL	male	Drinks Alcohol 1-2 times/week	Yes	No	No	0.421062	2.8	2.5	No	90.197	4.502	No	Yes	Yes	0.3	Primary/All Age	Semi/Unskilled	0-9	No	No	No	0.693147	No
879	18	71.3	176.5	89.2	No	No	22.8876	18.5-24.99 kg/m.sq	101	65	77.9333	96.9667	0.803713	No	3.8	4.1	4.4	1.33	2.8911	0.39	No	No	No	No	3.30827	High PAL	male	Rarely Drinks Alcohol	No	No	Yes	0.441549	7.3	3.3	No	73.2119	4.29336	No	No	No	0.3	Tertiary	Highly Skilled	15-17	No	No	No	1.41099	No
880	19	67.7	174.7	73.1	No	No	22.1821	18.5-24.99 kg/m.sq	109	71	72.0333	92.2	0.781273	No	4.3	7.9	3.1	1.08	1.87321	0.32	No	No	No	No	2.87037	High PAL	male	Drinks Alcohol 1-2 times/week	No	No	Yes	0.412326	4.7	7.4	No	88.4254	4.48216	No	No	No	0.5		Skilled	0-9	No	No	No	2.06686	No
881	19	63.7	173	63.7	No	Yes	21.2837	18.5-24.99 kg/m.sq	121	74	74.0667	93.7	0.790466	No	4.9	3.2	4.9	0.98	3.61266	0.67	No	No	No	No	5	Moderate PAL	male	Drinks Alcohol 3 or more times/week	No	Yes	Yes	0.428131	5.7	3	No	100.487	4.61002	No	Yes	No	0.3	Secondary	Skilled	10-14	No	No	No	1.16315	No
882	20	69.9	180	116.7	No	Yes	21.5741	18.5-24.99 kg/m.sq	114	69	75.6333	91.5	0.826594	No	4.6	5.1	4	0.76	2.89138	0.76	No	No	No	No	5.26316	Moderate PAL	male	Drinks Alcohol 3 or more times/week	Yes	No	Yes	0.420185	3.8	5.3	No	57.0694	4.04427	Yes	Yes	Yes	0.3	Secondary	Skilled	10-14	No	No	No	1.62924	No
883	20	66.8	181.2	66.9	No	Yes	20.3451	18.5-24.99 kg/m.sq	117	55	72.3667	91.7	0.789168	No	5.5	6.6	3.3	0.93	2.07183	0.65	No	No	No	Yes	3.54839	Moderate PAL	male	Drinks Alcohol 3 or more times/week	No	No	No	0.399375	5	5.3	No	100.215	4.60732	No	Yes	Yes	0.4		Semi/Unskilled	0-9	No	No	No	1.88707	No
884	18	61.7	172.5	59.8	No	No	20.7351	18.5-24.99 kg/m.sq	125	65	68.0333	87.9	0.773986	No	5		4.4	1.27	2.83184	0.65	No	No	No	Yes	3.46457	High PAL	male	Drinks Alcohol 1-2 times/week	No	Yes		0.394396		1.5	No	106.731	4.67031	No	Yes	No	0.3	Secondary	Semi/Unskilled	10-14	No	No	No		No
885	18	70	171.3	83.3	No	Yes	23.8552	18.5-24.99 kg/m.sq	100	75	71.1	93.1333	0.763422	No	4.7	3.7	2.9	0.93	1.74982	0.48	No	No	No	No	3.11828	High PAL	male	Drinks Alcohol 1-2 times/week	No	No	Yes	0.415061	5.4	2.5	No	76.0876	4.33189	No	No	No	0.6	Tertiary	Skilled	10-14	No	No	No	1.30833	No
886	19	67.3	177.2	66.8	No	No	21.4332	18.5-24.99 kg/m.sq	102	65	72.3333	90.6333	0.798088	No	5.2	5.4	5.6	1.28	3.99431	0.71	No	No	Yes	Yes	4.375	Moderate PAL	male	Drinks Alcohol 3 or more times/week	No	No		0.408202	3.2	5.7	No	98.1497	4.58649	No	No	Yes	0.3	Tertiary	Highly Skilled	15-17	No	No	No	1.6864	No
887	19	74.7	167.5	91.8	No	Yes	26.6251	25-29.99 kg/m.sq	98	68	80.6333	102.8	0.784371	No	4.3	2.8	4.5	0.95	3.36651	0.4	No	No	No	No	4.73684	Moderate PAL	male	Never Drank Alcohol	No	No	Yes	0.481393	5.9	2.5	No	67.5109	4.21229	No	No		0.7	Secondary	Highly Skilled	15-17	No	No	No	1.02962	No
888	19	78.2	189.4	79.4	No	No	21.7995	18.5-24.99 kg/m.sq	126	79	79.3667	96.4667	0.822737	No	4.1	5.6	4.3	1.27	2.64009	0.85	No	Yes	No	No	3.38583	Moderate PAL	male	Drinks Alcohol 3 or more times/week	Yes	Yes	No	0.419043	4.2	4	No	88.2594	4.48028	No	No	Yes	0.3	Secondary	Semi/Unskilled	0-9	No	No	No	1.72277	No
889	20	82.2	190.6	63.8	No	Yes	22.6269	18.5-24.99 kg/m.sq	116	75	78.9667	100.933	0.782365	No	4.8	2	3.5	0.87	2.54284	0.19	No	No	No	No	4.02299	Moderate PAL	male	Drinks Alcohol 1-2 times/week	No	No	Yes	0.414306	3	2.5	No	110.536	4.70534	No	No	No	5.15	Secondary	Semi/Unskilled	15-17	No	No	No	0.693147	No
890	19	62.9	171.7	98	No	No	21.3359	18.5-24.99 kg/m.sq	97	67	71	86.6	0.819861	No		3.7	4.8	1.42	3.11853	0.57	No	No	No		3.38028	Moderate PAL	male	Never Drank Alcohol	No	No	No	0.413512	4.3	12.4	No	64.8255	4.1717	No	No		3.1	Primary/All Age	Skilled	0-9	No	No	No	1.30833	No
891	19	66.7	174.7	76.2	No	No	21.8545	18.5-24.99 kg/m.sq	97	58	76.5667	92.1333	0.831042	No	4.7		3.6	1.14	2.21229	0.54	No	No	No	No	3.15789	Moderate PAL	male	Drinks Alcohol 3 or more times/week	No	No	Yes	0.438275	7	2.9	No	84.8281	4.44063	No	Yes	No	0.55	Tertiary	Highly Skilled	10-14	No	No	No		No
892	18	62.9	166.2	59.8	No	No	22.7713	18.5-24.99 kg/m.sq	118	74	71.4667	96.1333	0.743412	No	5.1		4.5	1.13	3.18193	0.41	No	No	No	Yes	3.9823	High PAL	male	Rarely Drinks Alcohol	No	No	Yes	0.430004	9.8	1	No	102.833	4.6331	No	No	No	0.3	Secondary	Skilled	10-14	No	No	No		No
893	20	70.9	163.8	60.7	No	No	26.4252	25-29.99 kg/m.sq	138	84	82	101.4	0.808679	No	5	3.6	4.7	1.34	2.97009	0.85	No	No	No	Yes	3.50746	Low PAL	male	Drinks Alcohol 1-2 times/week	Yes	Yes	Yes	0.50061	6.4	6.7	No	99.8451	4.60362	No	Yes	Yes	2.85	Tertiary	Highly Skilled	10-14	No	No	No	1.28093	No
894	19	74.5	185.9	82.4	No	Yes	21.5575	18.5-24.99 kg/m.sq	127	74	76.6	96.4	0.794606	No	4.9	3.1	4.1	0.95	2.50321	1.41	No	No	No	No	4.31579	High PAL	male	Drinks Alcohol 3 or more times/week	Yes	Yes	No	0.41205	4	9.9	No	83.4745	4.42454	No	No	Yes	0.4		Semi/Unskilled	10-14	No	No	No	1.1314	No
895	19	70.3	175.5	85.6	No	No	22.8245	18.5-24.99 kg/m.sq	110	66	73.5	97.4	0.75462	No	4.9	5.2	3	1.15	1.68945	0.35	No	Yes	No	No	2.6087	Moderate PAL	male	Drinks Alcohol 1-2 times/week	No	No	No	0.418803	8.2	9.6	No	75.8586	4.32887	No	No	No		Primary/All Age	Semi/Unskilled	10-14	No	No	No	1.64866	No
896	19	46.5	141	85.6	No	Yes	23.3892	18.5-24.99 kg/m.sq	132	81	64.5	74	0.871622	No	5.3	12.2	4.7	0.82	3.66899	0.46	No	No	No	Yes	5.73171	Moderate PAL	male	Rarely Drinks Alcohol	No	Yes	Yes	0.457447	9.1	8.9	No	60.9463	4.10999	No	No	No	0.6	Secondary	Highly Skilled	15-17	No	No	No	2.50144	Yes
897	18	56.4	166.3	83.3	No	No	20.3936	18.5-24.99 kg/m.sq	105	67	68.9	84.2333	0.817966	No	4.7	3.2	2.8	1.1	1.47064	0.5	No	No	No	No	2.54545	High PAL	male	Drinks Alcohol 1-2 times/week	No	No		0.414311	3.7	2	No	73.8667	4.30226	No	No	No	0.3	Secondary	Skilled	0-9	No	No	No	1.16315	No
898	18	72.6	183.7		No		21.5139	18.5-24.99 kg/m.sq	106	59	76.4	92.7	0.824164		4.1	3.2	2.7			0.57	No	Yes	No	No		High PAL	male	Rarely Drinks Alcohol	No	No	No	0.415895	5.8	4.6	No				Yes	No	1.5	Secondary	Semi/Unskilled	0-9	No	No	No	1.16315	No
899	18	80.4	178	86.2	No	No	25.3756	25-29.99 kg/m.sq	116	71	82.6	97.9	0.843718	No	4.9	6.3	3.7	1.07	2.33642	0.64	No	No	No	No	3.45794	Moderate PAL	male	Rarely Drinks Alcohol	No	No		0.464045	4.1	10.9	No	76.4037	4.33603	No	No	No	0.7	Tertiary	Highly Skilled	10-14	No	No	No	1.84055	No
900	19	68.3	178.1	73.1	No	No	21.5324	18.5-24.99 kg/m.sq	117	79	69.7667	92.8667	0.751256	No	5.2	8	4.4	1.08	2.93927	0.83	No	No	No	Yes	4.07407	High PAL	male	Drinks Alcohol 3 or more times/week	Yes	No	Yes	0.391728	7.5	3.8	No	90.1464	4.50143	No	No	No	1.3			0-9	No	No	No	2.07944	No
901	19	60.7	179.7	68.6	No	Yes	18.7972	18.5-24.99 kg/m.sq	106	66	67.1	85.7	0.782964	No	4.2	6.6	4.2	0.51	3.3322	0.78	No	No	No	No	8.23529	High PAL	male	Drinks Alcohol 1-2 times/week	Yes	No		0.3734	3.7			96.9227	4.57391		No	No		Secondary	Highly Skilled	10-14	No	No	No	1.88707	No
902	19	53.6	170.5	79.3	No		18.4381	<18.5 kg/m.sq.	117	72	64.5667	83.5333	0.772945								No	No	No			Moderate PAL	male	Drinks Alcohol 3 or more times/week		No		0.37869	3.5	7.5	No	79.5523	4.37642	No	No	No	0.3			10-14	No	No	No		No
[truncated: 6 more columns]
